# Supplementary material for: Adaptive loss of shortwave sensitive opsins during genomic evolution in cartilaginous fish
Source: Research Square preprint supplement (doi:10.21203/rs.3.rs-4794293/v1), 2024-08-14
Supplement: Supplementary file 1 [file 2e6cdac42dd1c173c7ed2586.xlsx]

## Sheet: Gene expression 
Supplementary Data 1: Gene expression (FPKM) level of the 3,530 genes in eight samples
ID	Gene symbol	Eye	Liver	Skin of of back	Skin of the belly	Ovary-1	Ovary-2	Testic-1	Testic-2
Rajpo04826	gnb1a	3036.07	55.37	77.74	90.87	163.33	179.94	268.56	75.21
Rajpo01472	rpl4	1677.57	2118.24	4624.17	5490.8	3768.28	5667.35	4609.74	3316.81
Rajpo09661	rps5	1367.87	1775.28	8615.79	11792.1	4388.32	1834.41	6624.48	2898.77
Rajpo08659	tubulin alpha-3 chain-like (A)	1334.44	396.37	145.87	125.89	2382.29	327.19	975.16	140.9
Rajpo11158	prph2	1222.96	0.67	1.63	0.47	1.52	0	0.22	0
Rajpo05701	slc25a5	1198.85	490.55	1436.83	1473.37	1035.25	780.93	1983.66	348.19
Rajpo07616	rps12	1170.99	1542.12	5794.87	8509.74	3202.19	2120.55	5585.78	2188.79
Rajpo21490	pkm	1033.23	56.88	5090.87	3961.48	869.62	237.21	324.79	2934.03
Rajpo14479	LOW QUALITY PROTEIN: ubiquitin carboxyl-terminal hydrolase isozyme L1-like (A)	957.99	0.24	10.72	3.82	1311.18	52.6	0.1	0
Rajpo02774	ENO1	900.32	206.42	2229.34	1727.64	282.61	9	74.05	464.49
Rajpo12544	eukaryotic initiation factor 4A-I-like (A)	810.09	397.94	762.24	629.19	1036.38	860.16	1362.47	797.84
Rajpo17943	glutamine synthetase, mitochondrial-like (A)	807.74	1105.15	255.62	130.54	146.55	115.04	161.16	76.44
Rajpo16797	peroxiredoxin-1-like (A)	765.41	529.23	265.36	375.25	2280.38	58.56	1551.69	226.01
Rajpo22919	ACTC1	764.25	4.69	22759.8	18885.6	46	38.5	16.07	10237.3
Rajpo18584	dcn	626.97	3.23	121.64	212.23	27.17	5.66	827.13	113.91
Rajpo06129	syt5a	624.2	0.08	2.48	1.91	5.52	0.84	0.04	1.94
Rajpo09202	tryptophan 5-hydroxylase 1 isoform X1 (A)	613.04	1.69	0.34	0.28	0.03	0	0.13	0.16
Rajpo18634	calmodulin-like (A)	576.4	164.73	292.99	335.82	679.64	1092.79	783.66	192.09
Rajpo15022	calr	554.03	1544.39	441.87	569.02	1122.84	3089.74	1562.22	420.63
Rajpo22428	insulin-like growth factor-binding protein-like 1 (A)	488.86	0.35	79.95	158.17	119.6	6.25	746.79	307.7
Rajpo18013	nucleosome assembly protein 1-like 1 isoform X1 (A)	400.15	138.01	132.66	204.42	433.22	205.1	336.82	101.77
Rajpo12846	slc2a1	381.45	44.88	253.9	66.05	4.44	14.63	48.18	67.66
Rajpo17207	fkbp1b	358.46	92.65	562.99	673.19	272.7	383.92	569.99	586.83
Rajpo15508	eukaryotic translation initiation factor 4E-binding protein 2 (A)	347.81	172.5	783.88	716.15	406.38	559.88	578.03	1212.47
Rajpo05083	cpe	340.5	0.4	6.63	2.04	13.02	1.63	2.92	4.13
Rajpo08935	nlk2	329.72	36.85	89.77	57.22	124.53	57.6	40.27	156.56
Rajpo16323	ube2z	326.74	213.91	2386.42	1357.41	422.44	282.14	834.23	682.47
Rajpo08535	atp5po	320.83	170.3	1604.97	1299.33	537.68	365.18	1234.11	824.77
Rajpo00832	atp5d	316.45	180.82	2260.8	1344.15	416.35	341.75	575.47	1040.78
Rajpo19917	14-3-3 protein beta/alpha-1-like (A)	309.19	67.97	69.3	52.99	203.68	104.45	110.3	82.76
Rajpo20118	LOW QUALITY PROTEIN: 14-3-3 protein zeta (A)	283.17	85.77	58.94	50.96	347.1	106.86	137.46	64.08
Rajpo21819	ywhae1	282.82	86.52	222.91	256.84	367.04	110.57	649.6	223.34
Rajpo15675	ndrg4	271.5	0.76	5.69	5.48	48.16	0.39	0.16	17.87
Rajpo01980	ass1	265.67	1690.48	1192.38	2322.42	321	355.77	3365.13	346.35
Rajpo11887	mdk	257.89	0.52	0	0	11.62	1.5	0.3	1.54
Rajpo22851	serine/threonine-protein phosphatase 2A 65 kDa regulatory subunit A alpha isoform (A)	256.42	50.27	66.64	69.18	197.83	69.86	261.25	61.42
Rajpo19764	tubulin beta-5 chain-like (A)	250.95	20.67	84.66	45.95	316.17	35	72.14	80.84
Rajpo01818	rab GDP dissociation inhibitor alpha (A)	237.51	1.74	1.01	0.18	24.12	1.79	4.31	1.88
Rajpo08916	laptm4a	232.7	255.08	180.7	270.08	207.69	505.13	613.93	155.01
Rajpo10483	LOW QUALITY PROTEIN: ornithine decarboxylase antizyme 2 (A)	232.42	75.59	477.32	601.59	246.84	141.1	352.68	162.53
Rajpo16220	LOW QUALITY PROTEIN: gamma-aminobutyric acid receptor subunit alpha-1-like (A)	231.22	0	0.49	0.17	0	0	0.03	0.07
Rajpo13737	tspan7	230.8	1.15	28.72	13.76	30.12	3.04	0.36	37.31
Rajpo14935	ppp1cc	222.63	133.81	127.98	116.07	475.65	402.08	646.57	129.7
Rajpo18181	btf3l4	220.62	306.2	714.11	1146.69	889.57	661.84	1316.79	1241.93
Rajpo17569	PPP1CB	219.03	76.09	216.13	129.37	114.49	58.69	74.09	373.12
Rajpo18748	tubulin alpha chain-like (A)	216.53	102.01	852.25	687.16	471.01	215.98	1056.74	825.5
Rajpo15320	tmco1	214.62	163.87	389.87	372.71	422.36	759.56	223.39	842.11
Rajpo03939	LOW QUALITY PROTEIN: plasminogen activator inhibitor 1 RNA-binding protein-like (A)	210.53	129.14	212.26	224.92	308.81	252.76	593.79	216.4
Rajpo20160	nsg2	210.47	0.82	0.22	0.35	8.84	0	0.3	0.21
Rajpo15473	rod cGMP-specific 3',5'-cyclic phosphodiesterase subunit alpha-like (A)	209.92	0	0	0	0.09	0.11	0	0.07
Rajpo22099	ADP-ribosylation factor 1-like (A)	207.97	91.13	87.38	89.8	194.3	112.99	326.07	96.39
Rajpo16631	glutamate decarboxylase 1 (A)	207.74	0.03	0	0.04	4.84	0	0.07	0
Rajpo14040	got2	206.14	85.25	637.28	240.58	346.32	95.71	232.52	198.14
Rajpo16219	gabrg2	204.21	0	1.1	0.84	0.07	0	0	0
Rajpo19412	ndufv2	202.3	125.59	1167.1	776.36	326.47	296	547.65	410.53
Rajpo20613	rpn1	201.85	178.81	121.52	81.82	442.31	435.51	297.36	144.85
Rajpo18981	tmem59	198.96	99.42	234.73	506.26	365.83	269.05	645.65	152.17
Rajpo05917	mapk1	197.89	130.55	48.89	39.96	379.27	107.96	375.38	75.19
Rajpo21886	st13	192.76	108.97	157.45	162.54	286.21	283.38	389.5	221.22
Rajpo13226	btf3	192.1	145.18	208.85	360.18	733.14	263.69	523.04	211.7
Rajpo16768	histone H3.3 (A)	191.75	93.55	202.11	249.11	156.1	191.94	400.67	118.83
Rajpo05299	non-histone chromosomal protein HMG-14A-like (A)	191.15	81.66	161.81	128.03	390.23	273.95	241.04	42.48
Rajpo13483	gpm6bb	189.4	5.93	8.75	5.51	6.38	1.34	10.53	24.5
Rajpo15312	regulator of G-protein signaling 5-like (A)	188.73	74.57	155.94	26.85	58.41	24.64	111.35	59.82
Rajpo07912	cnn3	188.1	40.94	31.53	19.19	105.37	33.67	56.57	58.95
Rajpo02917	rab GDP dissociation inhibitor beta-like (A)	187.39	50.89	98.67	136.08	364.19	88.82	400.28	109.87
Rajpo12357	actin, non-muscle 6.2 (A)	186.61	274.28	173.35	141.27	826.42	41.23	994.04	132.31
Rajpo15940	basigin-like isoform X1 (A)	185.57	61.87	72.45	39.22	143.54	122.52	83.93	50.3
Rajpo08870	psmb7	185.44	84.64	509.13	613.93	735.33	304.14	1215.69	687.83
Rajpo19429	pfn2	182.42	54.91	72.26	53.34	400.29	54.35	13.05	90.62
Rajpo14767	glutathione S-transferase 3-like (A)	180.12	602.91	234.11	307.71	75.33	230.29	929.9	633.73
Rajpo02121	AHCY	175.8	3624.5	214.2	229.56	322.82	287.98	261.3	143.41
Rajpo21035	rpn2	175.58	259.3	145.22	225.75	386.94	449.24	585.28	119.89
Rajpo02868	thop1	173.93	18.98	23.68	22.75	94.93	17.07	131.74	31.9
Rajpo19934	srrm1	173.86	89.23	135.55	111.2	245.12	327.92	107.9	97.15
Rajpo08296	V-type proton ATPase subunit B, brain isoform-like (A)	172.08	27.26	35.23	25.07	121.1	69.11	99.02	32.63
Rajpo17007	sumo3a	171.79	132.4	366.45	683.78	482.48	138.99	995.8	379.01
Rajpo07408	tfg	171.09	150.86	92.19	87.34	320.53	390.1	259.98	98.79
Rajpo06209	PRKACB	169.37	36.34	19.18	6.72	63.27	49.66	28.21	29.05
Rajpo16451	slc38a3	168.1	151.58	58.18	26.5	1.27	11.13	0.12	152.31
Rajpo04673	ADP-ribosylation factor 4-like (A)	167.93	85.57	81.68	63.33	178.24	194.79	187.66	75.04
Rajpo10089	hmgcs1	167.22	2245.56	113.92	51.16	162.89	185.5	128.48	53.75
Rajpo14177	vesicle-trafficking protein SEC22b (A)	163.89	135.66	352.78	448.6	359.63	599.3	643.27	701.26
Rajpo02728	ube2e3	161.77	46.83	49.19	63.67	289.91	74.01	120.69	46.79
Rajpo03933	insulin-induced gene 1 protein-like (A)	161.03	166.46	16.49	16.91	90.92	48.64	65.95	9.13
Rajpo08988	superoxide dismutase [Cu-Zn]-like (A)	160.69	250.1	316.36	400.57	621.06	267.82	613.92	195.33
Rajpo00308	GNB3	159.75	0	0.39	0.32	0.07	1.01	0.24	0.62
Rajpo21695	hnrnpr	159.5	69.93	68.14	87.31	150.35	170.76	399.82	83.61
Rajpo05059	hsp90aa1	158.59	684.19	117	253.4	490.04	201.82	284.19	258.58
Rajpo06343	atp6v0d1	158.42	53.31	35.5	35.97	211.19	114.1	167.82	39.68
Rajpo17535	fstl5	157.72	0	0.11	0.06	4.97	0	0.2	0.1
Rajpo04634	poly(U)-binding-splicing factor PUF60 isoform X1 (A)	156.79	72.6	124.43	114.45	321.15	182	282.28	73.12
Rajpo00358	sec61b	153.6	206.12	365.33	649.48	332.87	828.73	1699.58	153.26
Rajpo15242	myosin regulatory light polypeptide 9 (A)	151.87	35.49	94.23	67.1	117.3	145.52	107.97	64.92
Rajpo17006	hn1	151.46	38.27	107.2	140.38	545.41	73.15	137.08	44.78
Rajpo10602	msi1	151.13	0.21	0.23	0.31	4.95	10.71	0.97	0.81
Rajpo16015	CAMK2G	150.06	12.26	23.82	15.88	55.71	31.76	12.82	30.43
Rajpo03436	eif3g	149.9	126.96	582.56	706.16	330.14	390.8	472.04	888.11
Rajpo12598	ATP1A1	147.58	21.98	100.86	64.83	145.41	76.01	128.02	79.55
Rajpo04806	GYG1	144.9	48.1	235.41	190.66	168.24	100.75	32.8	345.84
Rajpo02678	wsb1	143.27	130.15	226.86	327	199.84	153.28	227.71	108.02
Rajpo22583	microtubule-associated proteins 1A/1B light chain 3A isoform X1 (A)	142.82	77	135.13	117.14	125.53	1008.83	226.14	119.03
Rajpo09207	TSG101	140.69	89.49	157.41	240.21	366.54	248.68	479.41	141.91
Rajpo22944	vesicular glutamate transporter 1 (A)	139.85	0	0	0	1.39	0.25	0	0
Rajpo09375	slc6a15	138.65	0.02	1.46	0.41	3.64	0	6.96	0.08
Rajpo21868	protein NDRG1-like isoform X1 (A)	136.87	278.79	13.06	16.11	14.48	103.53	256.83	45.84
Rajpo15159	ras-related protein Rab-2A (A)	136.69	92.57	99.28	160.49	203.58	233.07	632.73	107.28
Rajpo01745	sf3b1	135.7	119.99	105.65	127.85	95.91	414.6	154.12	136.57
Rajpo14068	syntaxin-binding protein 4-like (A)	135.29	0.05	0.13	0.21	0.46	0.07	0.4	0
Rajpo05666	regulator of G-protein signaling 9 isoform X1 (A)	134.31	0	0	0.06	0.04	0.11	0.03	0
Rajpo00144	rab5a	134.04	85.35	75.01	115.2	292.9	145.78	230.01	74.66
Rajpo10592	non-POU domain-containing octamer-binding protein-like isoform X1 (A)	133.9	86.54	58.93	64.44	243.7	208.93	326.28	97.41
Rajpo15713	hars	133.78	145.93	274.53	349.51	860.24	118.44	2110.48	127.27
Rajpo12345	osbpl1a	131.31	7.18	6.77	4.94	28.17	5.03	1.4	16.84
Rajpo19464	ADP-ribosylation factor 1-like (A)	130.22	52.06	69.12	149.4	271.14	145.65	806.76	97.57
Rajpo12395	cct6a	129.36	56.63	78.27	94.15	197.85	31.5	354.1	157.66
Rajpo15718	ndufa2	126.92	42.99	2475.34	1680.69	201.78	145.16	287.13	893.6
Rajpo18021	SYT1	125.67	3.51	0	0	4.92	0.12	0.04	0.07
Rajpo16819	A-kinase anchor protein 8-like (A)	122.09	68.18	73.03	93.4	212.59	151.52	285.36	100.5
Rajpo21269	DNAJB6	121.58	59.21	116.58	121.98	335.52	243.26	167.03	307.8
Rajpo02556	phyhiplb	120.85	0.14	8.02	11.04	52.53	2.87	23.65	1.1
Rajpo14490	suclg1	120.61	121.69	719.94	386.29	139.89	221.14	190.11	342.8
Rajpo12529	stt3a	120.32	199.94	129.87	138.46	223.91	604.03	261.34	207.16
Rajpo08835	wdr1	120.22	59.1	104.64	143.9	186.04	99.08	403.07	91.43
Rajpo01747	hspd1	120.21	132.26	93.45	76.02	317.71	56.11	358.12	80.37
Rajpo04300	nmt1a	120.04	28.67	77.97	51.21	141.77	36.99	126.18	146.95
Rajpo05060	dync1h1	119.25	25.19	40.04	52.18	52.81	88.48	93.35	34.87
Rajpo01476	ras-related protein Rab-11A (A)	119.13	90.11	186.3	543.64	426.38	157.12	1435.6	136.17
Rajpo06583	grtp1	119.06	1.35	9.93	17.84	26.1	42.3	35.83	1.75
Rajpo13668	GNB5	119.02	0.2	7.04	1.8	6.3	2.16	1.68	8.33
Rajpo06031	psma1	117.9	102.12	284.36	361.02	386.83	124.38	634.55	254.59
Rajpo22666	lypla1	117.77	42.46	85.38	64.29	137.36	60.73	234.09	55.1
Rajpo17779	atp6v1e1	117.54	38.14	87.05	97.01	277.44	102.17	135.87	98.65
Rajpo01533	tkt	116.55	34.72	14.42	15.22	69.87	41.91	81.1	8.04
Rajpo10446	sptbn1	116.24	4.48	21.52	10.5	25.16	15.94	25.45	53.81
Rajpo06580	mcf2la	116.21	0	7.27	3.76	6.23	0	0.85	0.27
Rajpo19480	psmd3	116.2	53.67	241.43	177.45	256.97	229.14	217.66	302.26
Rajpo20067	timp2a	115.85	14.95	33.01	19.38	27.02	5.53	36.7	55.13
Rajpo09822	LOW QUALITY PROTEIN: coxsackievirus and adenovirus receptor homolog (A)	114.7	31.65	13.08	17.06	13.53	75.23	59.87	2.15
Rajpo14788	LOW QUALITY PROTEIN: atypical kinase COQ8A, mitochondrial-like (A)	113.18	96.23	490.46	150.24	124.91	240.26	142.52	191.54
Rajpo19937	hippocalcin-like protein 1 (A)	112.89	0.33	0	0.51	3.28	0.65	1.65	0
Rajpo15304	rpa3	112.28	46.99	154.08	281.42	1147.95	289.89	482.68	160.07
Rajpo20626	TOM1-like protein 2 isoform X1 (A)	111.47	36.79	60.59	40.32	174.48	109.73	101.43	322.8
Rajpo13719	LOW QUALITY PROTEIN: 26S protease regulatory subunit 4-like (A)	111.46	49.87	180.49	132.71	203.41	131.85	211.87	358.15
Rajpo19858	LOW QUALITY PROTEIN: aldose reductase-like (A)	110.74	5.57	358.02	905.93	22.98	7.31	1097.67	521.35
Rajpo19538	btbd10	110.73	14.07	50.73	37.27	254.47	44.13	65.87	114.56
Rajpo00801	serine/threonine-protein phosphatase 2A catalytic subunit beta isoform (A)	110.7	43.1	110.44	150.79	296.43	111.67	323.44	134.9
Rajpo11912	vapb	110.37	53.43	71.54	83.49	98.93	95.46	150.35	134.33
Rajpo15293	26S proteasome complex subunit DSS1 (A)	110.05	91.79	872.27	1051.02	837.25	369.01	1046.64	585.75
Rajpo16222	gabrb2a	109.85	0	0.14	0	0.62	0.11	0	0
Rajpo12069	eif3a	108.75	54.17	50.31	41.91	231	213.98	113.59	69.8
Rajpo02181	timm23	108.1	44.11	103.78	71	194.65	101.33	96.98	107.98
Rajpo14021	ube2h	107.76	43.8	62.54	60.74	242.87	164.8	127.34	54.44
Rajpo07063	dnaja1	105.46	78.84	147.2	240.23	426.55	135.44	276.19	107.57
Rajpo15227	rad21	104.96	74.6	100.91	149.41	211.61	177.8	225.15	87.38
Rajpo15841	ssu72	104.62	81	349.35	458.77	541.48	565.95	456.21	658.57
Rajpo05810	pgd	104.49	46.45	78.95	94.58	195.4	90.69	308.11	44.4
Rajpo22042	vopp1	104.18	1.66	11.12	4.04	16.3	50.93	3.43	21.06
Rajpo12158	clcn3	103.8	4.9	6.15	3.99	36.31	201.33	15.9	9.61
Rajpo16706	sdcbp	103.2	120.54	101	266.47	144.63	85.97	480.74	64.9
Rajpo03951	srsf11	102.9	58.03	307.73	256.23	333.41	282.02	257.85	99.91
Rajpo10479	lman2	102.17	156.29	37.26	30.91	283.74	344.46	114.53	66.45
Rajpo05166	cct2	101.66	44.31	114.79	183.96	293.39	81.03	369.42	222.53
Rajpo16072	GTP-binding protein SAR1a (A)	101.65	37.24	257.81	200.23	126.87	45.96	44.72	212.92
Rajpo16288	kdelr2	100.85	90.16	73.8	108.89	125.28	293.87	477.96	67.03
Rajpo00997	glutaminase kidney isoform, mitochondrial-like isoform X1 (A)	100.75	12.9	27.69	11.83	14.5	6.04	12.8	15.65
Rajpo14944	sarcoplasmic/endoplasmic reticulum calcium ATPase 2 isoform X1 (A)	99.91	39.98	810.35	136.07	95.71	65.58	49.19	21.89
Rajpo20365	PSMA3	99.64	93.51	242.01	375.1	480.97	217.61	651.18	440.84
Rajpo08140	PRKAR2A	99.07	11.71	12.92	20.1	45.54	62.26	28.82	11.83
Rajpo12845	rap1gapa	98.67	6.22	24.05	17.4	61.51	10.97	23.67	2.11
Rajpo16773	CSC1-like protein 2 isoform X1 (A)	98.63	10.9	12.79	2.78	83.63	18.27	18.89	9.67
Rajpo10626	serine/threonine-protein phosphatase 2A 55 kDa regulatory subunit B alpha isoform (A)	98.23	44.77	184.9	242.19	205.96	127.99	411.62	192.19
Rajpo21597	mapre3	98.16	17.6	56.87	70.84	92.83	151.79	73.67	55.07
Rajpo19078	smap1	98.07	45.43	29.72	26.08	89.09	62.12	91.77	40.04
Rajpo01994	dynamin-1 isoform X2 (A)	97.95	0.04	0.18	0	0.45	0	0.2	0.07
Rajpo02945	F-actin-capping protein subunit alpha-2 (A)	97.48	52.87	558.39	583.09	196.55	99.91	547.78	543.56
Rajpo16919	eml1	97.19	0.6	21.54	13.73	20.43	5.42	8.95	20.07
Rajpo00127	pcyt2	96.98	123.34	93.65	138.89	36.4	43.84	93.91	69.74
Rajpo10770	rtn1a	96.74	0	62.82	76.82	28.91	1.38	12.25	5.78
Rajpo11300	sphingolipid delta(4)-desaturase DES1-like (A)	96.45	97.56	50.6	62.33	292.3	69.71	148.85	64.79
Rajpo07868	rheb	96.04	17.24	64.48	55.94	84.05	77.22	84.22	56.37
Rajpo20513	pdcd6ip	94.85	70.26	84.46	94.71	174.43	234	209.91	73.41
Rajpo10444	reticulon-4 isoform X1 (A)	94.42	17.96	184.75	200.44	42.12	44.63	80.09	264.97
Rajpo16995	pfkfb3	94.26	20.87	21.48	14.21	72.22	13.31	32.3	4.17
Rajpo19323	EH domain-containing protein 1 (A)	94.08	40.05	15.04	7.05	156.01	63.32	23.01	16.59
Rajpo09463	hk1	93.13	2.57	79.23	46.52	41.33	16.57	49.26	51.4
Rajpo16979	prpf18	92.96	47.08	97.68	141.76	231.1	99.33	299.55	75.64
Rajpo04085	G1/S-specific cyclin-D2 isoform X1 (A)	91.77	19.22	14.72	12.83	177.2	27.22	40.64	21.98
Rajpo16680	ogn	91.72	8.93	25.17	59.83	1.17	9.82	110.77	385.89
Rajpo20928	dldh	91.26	55.42	293.26	177.97	185.02	76.59	248.42	88.39
Rajpo17739	actin, aortic smooth muscle (A)	90.98	57.52	1233.88	1070.39	219.61	104.85	96.09	912.87
Rajpo21258	idi1	90.34	68.47	95.21	93.12	134.94	135.66	98.93	68.1
Rajpo02021	endophilin-B2 isoform X1 (A)	89.87	11.4	21.31	10.38	20.42	197.99	44.48	13.81
Rajpo10624	dihydropyrimidinase-related protein 2 isoform X1 (A)	89.75	0.02	1.02	0.19	68.87	0.86	0.28	1.92
Rajpo08150	coatomer subunit gamma-1 isoform X3 (A)	89.51	38.25	50.16	43.86	152.5	130.09	131.93	52.33
Rajpo06830	col4a5.S	89.36	0.5	1.26	2.17	12.53	1.41	17.99	1.81
Rajpo12825	SAMD11	89.33	4.06	1.42	1.91	13.18	1.68	11.76	4.42
Rajpo03912	serine/threonine-protein phosphatase 4 regulatory subunit 2 (A)	89.33	39	35.96	42.28	104.05	94.87	102.52	28.96
Rajpo10665	hdlbp	89.25	129.75	24.7	12.32	186.31	116.17	74.93	26.51
Rajpo10044	protein ABHD17B-like (A)	89.1	20.49	40.85	23.39	109.87	41.87	40.24	46.44
Rajpo08539	calcipressin-1-like (A)	89.05	60.48	121.67	71.83	106.44	57.04	116.89	70.74
Rajpo11101	LOW QUALITY PROTEIN: sodium/potassium-transporting ATPase subunit alpha-2-like (A)	88.74	310.57	139.68	81.39	10.29	49.63	0.53	101.56
Rajpo20634	ndfip2	88.52	41.66	44.79	46.67	33.04	69.61	105.35	72.29
Rajpo12863	snx14	88	47.13	36.67	42.57	139	170.19	44.39	39.66
Rajpo00287	insulin-like growth factor 2 mRNA-binding protein 2 (A)	87	4.58	18.77	15.45	92.41	1.53	24.96	5.96
Rajpo02903	chchd3a	86.62	89.01	471.93	314.01	349.12	176.45	308.54	260.37
Rajpo11420	clathrin heavy chain 1 isoform X2 (A)	86.29	34.56	16.39	20.48	248.53	36.72	82.98	11.66
Rajpo13016	IKZF4	85.71	121.96	653.54	1082.82	514.84	183.68	789.5	124.46
Rajpo05103	arglu1	85.52	33.39	82.56	105.74	155.74	125.19	163.7	58.92
Rajpo21016	ncoa5	85.25	38.53	27.99	18.82	81.01	47.65	68.37	33.42
Rajpo06106	emc10	85.08	46.77	276	290.01	229.18	171.22	163.99	255.43
Rajpo06166	csnk1db	84.58	28.15	52.35	42.83	224.99	67.22	106.65	83.26
Rajpo12149	endophilin-A1 isoform X1 (A)	84.08	1.24	5.97	7.33	64.33	7.62	11.86	2.6
Rajpo14778	ick	84.06	31.4	16.89	9.85	25.86	22.38	43.08	12.56
Rajpo09199	cd81	83.95	26.16	13.17	8.83	12.33	3.23	36.87	70.4
Rajpo21706	ethanolamine kinase 1-like (A)	83.94	23.6	32.53	29.09	103.83	127.83	34.12	15.66
Rajpo21185	2024-09-07	83.42	55.18	53.11	52.9	219.43	95.62	236.7	92.87
Rajpo18074	psmd1	83.42	26.01	69.23	70.65	189.18	68.67	140.32	173.88
Rajpo13594	peptidyl-prolyl cis-trans isomerase FKBP1B isoform X1 (A)	82.96	51.19	29.27	16.75	79.82	51.28	103.59	24.39
Rajpo14849	actin-related protein 2-B isoform X1 (A)	82.86	49.79	36.3	25.68	84.11	90.83	185.43	54.07
Rajpo01905	LOW QUALITY PROTEIN: alpha-actinin-1 (A)	82.78	34.39	12.08	11.89	94.97	69.11	236.47	18.91
Rajpo21909	fscn1a	82.7	5.06	11.16	4.47	290.05	3.21	41.75	18.79
Rajpo20311	rybp	82.66	14.68	54.58	44.14	43.19	28.51	93.71	29.42
Rajpo10558	ogt	82.63	43.49	60.36	55.84	55.38	255.52	63.2	59.17
Rajpo14094	engulfment and cell motility protein 1 isoform X1 (A)	82.51	32.1	7.07	3.46	19.86	21.14	22.12	9.81
Rajpo22344	LOW QUALITY PROTEIN: C-terminal-binding protein 2 (A)	82.43	18.91	8.31	3.88	39.9	33.99	24.46	14.56
Rajpo07731	ywhab	82.29	28.2	50.98	74.69	87.53	76.47	1125.13	39.76
Rajpo22844	dlat	82.23	13.22	154.02	41.65	52.74	57.62	35.01	91.5
Rajpo13935	gars	82.2	37.82	128.44	126.32	161.72	97.42	174.65	205.95
Rajpo22515	PRDX4	82.14	238.59	64.98	74.64	233.14	933.13	152	69.37
Rajpo08733	TM9SF3	81.66	53.44	39.95	69.14	113.44	117.45	184.39	36.21
Rajpo00226	tprg1l	81.33	10.57	29.56	30.56	45.81	52.89	71.73	95.77
Rajpo20098	lsm14a	81.03	31.37	30.76	14.87	301.1	55.87	78.06	61.68
Rajpo08447	EGF-like repeat and discoidin I-like domain-containing protein 3 (A)	80.59	32.83	2.99	2.45	5.95	2.16	19.63	68.42
Rajpo12172	tubulin beta-3 chain (A)	80.41	0.04	1	4.04	7.68	0.11	5.07	0
Rajpo11400	ulk2	79.62	87.11	71.24	14.17	28.35	88.72	10.39	29.64
Rajpo15011	LOW QUALITY PROTEIN: retinal guanylyl cyclase 2 (A)	79.52	0	0.29	0.17	0.08	0.04	0.01	0
Rajpo14407	beta-soluble NSF attachment protein (A)	79.43	0.64	1.9	1.84	9.82	10.15	1.55	0.34
Rajpo12582	atg3	79.26	55.79	78.41	85.06	330.37	151.13	142.95	119.64
Rajpo07490	ube2ql1	78.79	37.66	23.13	15.73	426.95	91.84	6.71	25.46
Rajpo18360	LOW QUALITY PROTEIN: nidogen-1-like (A)	78.71	5.72	48.27	16.16	80.53	7.8	19.99	62.61
Rajpo22670	atp6v1h	77.92	25.47	35.27	46.29	67.61	82.07	63.35	47.74
Rajpo11603	foxo3	77.89	20.56	30.9	8.99	11.58	23.69	11.65	34.7
Rajpo04291	ddx42	77.87	40.05	65.98	64.87	108.41	155	83.77	99.74
Rajpo04364	heparan-sulfate 6-O-sulfotransferase 1 (A)	77.69	25	3.76	2.82	6.8	3.85	22.27	6.7
Rajpo00820	rab10	76.84	50.82	120.21	166.33	156.75	74.27	393.79	135.57
Rajpo20123	azin1	76.69	35.17	64.07	56.26	205.26	48.63	104.5	50.69
Rajpo07333	GTP-binding protein SAR1b-like (A)	76.68	76.12	133.06	152.22	106.79	288.63	269.61	82.28
Rajpo22113	mrps9	76.67	8.27	20.94	21.42	99.17	26.14	30.15	20.61
Rajpo09773	ahsa1	76.45	211.92	72.92	64.37	202.32	56.07	145.16	121.3
Rajpo12340	proteasome subunit alpha type-7 (A)	76.06	40.86	172.67	172.86	163.88	93.15	148.25	180.2
Rajpo13627	RERE	76.05	17.98	14.64	5.99	57.46	50.06	13.66	14.85
Rajpo02655	Golgi reassembly-stacking protein 2 isoform X1 (A)	76	10.9	7.24	4.31	50.69	69.35	14.19	5.9
Rajpo22102	cul3	75.95	43.95	81.42	101.22	176.27	68.38	105.92	124
Rajpo01062	prrc2c	75.79	41.8	20.3	14.64	85.41	71.23	32.75	26.17
Rajpo20461	PDHX	75.48	26.56	201.18	114.03	251.15	159.34	93.71	89.32
Rajpo09353	tubulointerstitial nephritis antigen-like (A)	75.25	25.81	41	5.16	127.45	77.75	7.49	12.67
Rajpo22626	rab40c	74.85	14.15	23.76	23.5	109.56	47.63	49.81	27.34
Rajpo04577	cAMP-dependent protein kinase type I-alpha regulatory subunit (A)	74.78	35.88	20.71	18.82	104.56	47.37	91.02	25.72
Rajpo06349	nup62l	74.7	28.41	71.34	63.84	274.8	84.28	101.36	85.2
Rajpo13652	clpx	74.44	56.42	37.83	28.79	126.79	66.43	35.15	23.76
Rajpo02934	GNAO1	74.43	3.93	0.85	0.12	0.76	0.11	0.83	0.07
Rajpo16730	ogdh	74.42	35.48	159.78	63.4	179.8	71.29	65.9	41.72
Rajpo05940	PPP3R1	74.22	8.8	29.32	32.61	43.6	55.99	37.43	51.31
Rajpo06949	tumor necrosis factor receptor superfamily member 19-like isoform X1 (A)	74.21	1.1	3.61	15.58	47.75	78.79	98.24	1.97
Rajpo11312	LOW QUALITY PROTEIN: synaptoporin-like (A)	74.02	0.62	0	0	0.57	11.35	0.35	0
Rajpo17653	cysteine-rich secretory protein LCCL domain-containing 2-like isoform X1 (A)	73.91	12.12	4.62	3.79	11.07	2.45	10.19	4.25
Rajpo02955	wscd2	73.91	0.04	1.46	0.66	0.15	0	0.54	0.77
Rajpo14169	leptin receptor gene-related protein (A)	73.65	31.71	33.79	50.4	81.78	41.05	160.41	66.18
Rajpo06445	transitional endoplasmic reticulum ATPase (A)	73.49	34.08	46.5	47.35	147.57	48.26	179.49	40.49
Rajpo13696	LOW QUALITY PROTEIN: syntabulin-like (A)	73.36	0	2.4	2.49	81.9	5.45	4.77	1.57
Rajpo21198	snrka	73.19	11.37	10.6	7.01	12.7	4.48	15.88	3.76
Rajpo07197	pde6d	72.97	4.77	23.31	30.47	100.84	25.85	61.18	12.04
Rajpo13348	waca	72.7	43.55	25.64	22.91	161.89	139.34	82.99	33.9
Rajpo03731	dynlrb2	72.26	26.79	177.36	404.49	308.11	134.15	296.06	278.34
Rajpo07547	wdr61	72.25	25.4	65.45	87.35	204.62	156.31	157.78	79.07
Rajpo04687	psmc2	72.15	32.82	118.82	163.16	174.36	89.04	264.43	193.52
Rajpo14532	znf330	72.08	23.82	72.51	92.7	271.98	240.99	86.42	96.01
Rajpo01380	mthfd1l	71.66	0.44	4.14	6.66	40.09	0.18	42.66	0.95
Rajpo21191	emc2	71.52	17.9	109.41	51.46	89.16	23.14	69.43	77.33
Rajpo09802	dlst	71.35	47.08	129.76	65.86	110.92	43.43	168.05	71.24
Rajpo17029	itfg1	71.28	50.25	31.08	69.86	59.2	173.75	107.41	22.95
Rajpo09320	ras-related protein ORAB-1-like (A)	70.58	25.13	13.22	12.78	132.12	24.23	55.11	14.23
Rajpo19453	fam168a	70.2	19.34	18.23	9.37	20.23	24.77	47.89	46.4
Rajpo05669	arhgdia	70.15	50.75	79.62	119.23	231.66	178.87	561	54
Rajpo07526	ankmy2	70.09	15.71	79.7	136.78	260.96	82.71	137.77	122.95
Rajpo02530	transmembrane 9 superfamily member 2 (A)	69.94	32.87	35.06	26.12	124.26	102.65	59.5	75.19
Rajpo19935	calcipressin-3-like (A)	69.91	12.56	38.06	25.57	230.61	54.88	23.2	9.59
Rajpo15440	ppm1b	69.65	23.19	25.94	22.75	62.25	39.1	40.11	27.64
Rajpo12302	rhobtb1	69.46	20.82	16	17.23	12.35	61.08	44	2.91
Rajpo11250	got1	69.36	186.29	202.43	78.32	9.17	37.73	54.76	75.34
Rajpo16694	nt5dc2	69.15	17.71	13.19	17.77	124.19	14.76	27.26	8.66
Rajpo22388	tial1	69.11	47.19	117.64	133.7	99.66	91.91	193.41	113.08
Rajpo19606	cyrib	68.61	41.11	52.43	72.55	287.85	33.69	127.78	48.17
Rajpo02978	serine/arginine-rich splicing factor 1B (A)	68.46	43.15	123.23	259.67	270.45	98.87	499.77	81.46
Rajpo00740	psmd12	68.28	42.93	72.72	109.2	173.88	115.68	281.55	165.39
Rajpo05939	PNO1	67.98	34.12	253.58	293.85	214.14	135.96	192.1	294.81
Rajpo16290	rac1	67.91	69.85	71.7	63.52	135.48	68.95	492.66	91.89
Rajpo16938	psmd2	67.82	25.51	74.84	74.53	119.82	75.33	170.11	99.03
Rajpo20687	fmnl2	67.72	2.86	5.58	4.19	22.75	5.22	10.5	11.96
Rajpo22302	nomo	67.7	40.85	22.57	31.44	71.61	117.82	58.08	16.02
Rajpo07524	tspan13a	67.23	1.57	28.52	33.54	317.2	72.62	78.61	4.31
Rajpo10526	tada2a	66.88	125.48	84.06	95.08	214.99	69.23	108.49	69.19
Rajpo12095	gnptg	66.88	78.65	78.21	84.69	187.85	146.89	101.78	59.78
Rajpo17093	Uba3	66.87	9	21	30.67	63.53	30.76	62.55	26.55
Rajpo18986	ssbp3	66.55	14.18	16.2	9.05	149.9	49.69	25	24.5
Rajpo18656	COLGALT2	66.28	0	1.52	3.32	2.87	7.3	5.74	0.05
Rajpo05342	cuedc1	66.12	6.82	17.39	10.91	10.12	36.89	9.74	19.35
Rajpo12843	PPIH	66.04	30.71	86.73	84.53	205.15	56.56	138.08	157.97
Rajpo07257	rerg	65.77	0.32	0.59	0.32	2.93	0.31	2.87	1.15
Rajpo09229	serine/threonine-protein phosphatase 2A 55 kDa regulatory subunit B beta isoform (A)	65.62	0.2	0.61	0.1	1	0.38	0.45	4.34
Rajpo14547	hspa4l	65.6	86.76	62.04	163.67	245.5	39.28	155.39	53.1
Rajpo22005	dnaja3	65.26	26.01	64.82	54.78	199.57	115.2	109.17	83.03
Rajpo08320	kars	65.25	51.09	89.07	127.96	151.6	75.5	417.11	98.22
Rajpo11891	dusp8a	65.23	196.86	111.78	45.63	19.79	104.07	36.9	42.68
Rajpo11650	collagen alpha-1(V) chain-like isoform X1 (A)	65.23	2.11	30.31	27.14	5.95	0.87	58.59	39.55
Rajpo03184	aacs	65.05	16.74	12.88	15.55	34.21	21.04	22.43	10.28
Rajpo19803	pttg1ip	64.89	128.67	168.96	209.67	186.17	195.33	363.9	76.19
Rajpo15978	adenosine kinase-like isoform X1 (A)	64.81	349.81	47.8	54.25	67.51	96.09	115.11	70.92
Rajpo02970	rab18	64.79	40.8	45.13	48.81	103.09	124.71	91.33	99.78
Rajpo13894	uso1	64.62	53.39	49.22	37.85	85.79	157.51	60.64	70.6
Rajpo22890	arhgef12	64.59	11.23	9.2	4.93	17.85	27.02	13.75	12.7
Rajpo05859	med15	64.57	24.91	34.3	24.32	180.89	123.17	74.13	40.57
Rajpo08186	cplx4a	64.56	0	0	0	0	0	0	0
Rajpo07335	ubiquitin-conjugating enzyme E2 A-like (A)	64.51	103.35	93.95	66.64	57.75	53.39	71.27	147.74
Rajpo16108	mitogen-activated protein kinase 14 isoform X2 (A)	64.21	81.41	100.91	141.87	206.99	180.17	167.05	107.81
Rajpo22601	plod2	64.18	6.59	28.66	15.39	22.36	21.28	25.31	21.58
Rajpo06054	mtdha	64.06	160.26	82	69.14	115.08	137.54	110.67	95.07
Rajpo16491	coiled-coil domain-containing protein 3-like (A)	63.66	0.3	3.9	2.26	2.69	2.64	11.89	10.54
Rajpo03000	acyl-CoA (8-3)-desaturase (A)	63.43	0	0.6	1.71	1.26	0.23	10.44	0.86
Rajpo12497	3-methyl-2-oxobutanoate dehydrogenase [lipoamide] kinase, mitochondrial-like (A)	62.94	109.72	88.86	41.14	21.95	79.67	22.4	124.84
Rajpo12593	casq2	62.81	0.16	1147.91	333.38	1.99	0.12	0.64	4289.92
Rajpo01681	mbnl2	62.7	37.57	24.98	16.02	8.57	31.47	72.83	49.83
Rajpo11593	zmp:0000000755	62.68	0.65	15.86	14.34	6.66	6.56	24.69	44.35
Rajpo20342	cnih1	62.53	27.69	68.46	126.55	94.64	64.16	150.46	74.16
Rajpo18681	sppl3	62.46	7.61	12.66	7.51	121.22	25.18	41.8	15.21
Rajpo13507	znf423	62.37	4.93	17.2	9.79	33.05	13.87	10	19.29
Rajpo09519	immunoglobulin superfamily member 21 (A)	62.29	0.15	2.29	0.45	2.87	0.54	0.78	1.54
Rajpo05014	uchl5	62.04	39.28	85.07	100.7	151.45	289.68	110.73	79.4
Rajpo11752	dhx15	61.75	37.25	32.14	41.23	80.75	82.3	97.6	28.83
Rajpo15005	rraga	61.54	54.47	84.34	80.22	233	200.66	103.27	219.62
Rajpo04914	ube2g1	61.36	14.72	142.02	118.99	298.68	26.53	100.84	518.09
Rajpo16346	sel1l	61	50.87	31.19	34.14	60.38	252.19	68.86	32.66
Rajpo13399	LOW QUALITY PROTEIN: phosphatidylinositol 3-kinase regulatory subunit alpha (A)	60.95	105.32	26.35	14.26	46.01	91.47	18.14	34.47
Rajpo01979	fubp3	60.81	39.44	26.64	20.62	54.17	91.23	116.65	42.76
Rajpo01332	LOW QUALITY PROTEIN: solute carrier family 12 member 7-like (A)	60.55	3.08	3.1	2.97	25.68	2.31	28.66	8.25
Rajpo20815	cars2	60.28	37.73	71.59	96.69	300.6	206.23	130.01	69.19
Rajpo06032	copb1	60.1	38.42	48.17	57.08	90.63	166.33	135.39	67.24
Rajpo18290	nucks1a	59.97	49.95	83.19	78.12	239.77	62.86	149.48	81.51
Rajpo11777	napa	59.86	41.9	27.69	22.43	113.57	96.42	47.49	40.82
Rajpo01545	cyhr1	59.67	23.59	22.06	12.5	86.86	88.18	7.19	42.09
Rajpo11506	rhot1	59.55	9.79	25.94	11.65	59.12	26.72	16.27	19.93
Rajpo12663	tropomyosin alpha-1 chain-like isoform X1 (A)	59.52	12.01	18.41	26.15	109.24	27.3	105.25	23.86
Rajpo02300	adamts15	59.42	3.35	21.89	9.65	4.03	0.74	20.71	24.48
Rajpo12352	LOW QUALITY PROTEIN: Niemann-Pick C1 protein-like (A)	58.85	157.02	24.59	21.93	176.77	26.02	44.68	24.44
Rajpo10014	BICD family-like cargo adapter 1 isoform X1 (A)	58.72	0.13	11.64	11.01	1.37	248.7	25.08	2.29
Rajpo09836	gss	58.69	81.6	70.88	78.02	179.29	193.65	124.1	56.57
Rajpo15023	farsa	58.33	42.15	42.69	34.32	140.42	76.53	71.28	52.28
Rajpo19992	eif4b	58.32	45.62	26.37	15.8	77.87	51.59	54.95	47.23
Rajpo20490	LOW QUALITY PROTEIN: succinate dehydrogenase [ubiquinone] flavoprotein subunit, mitochondrial-like (A)	57.94	32.26	196.73	119.66	107.68	43.72	136.29	65.7
Rajpo05105	ephrin-B2-like (A)	57.85	1.62	3.32	3.46	5.1	3.6	47.09	3.98
Rajpo11893	LOW QUALITY PROTEIN: N-acetyl-beta-glucosaminyl-glycoprotein 4-beta-N-acetylgalactosaminyltransferase 1 (A)	57.82	0.19	0.53	0.27	2.87	2.02	0.97	0.31
Rajpo05234	rassf8b	57.79	6.08	36.35	13.91	2.91	4.58	6.21	29.52
Rajpo10132	calnexin-like (A)	57.68	3.15	2.86	2.24	77.74	1.13	14.19	2.34
Rajpo11254	slc25a28	57.58	45.3	98.12	100.56	166.03	125.46	209.68	72.88
Rajpo10723	rac3a	57.33	0	3.13	0	37.36	9.8	1.17	3.43
Rajpo14903	ap1b1	57.27	80.56	16.15	12.64	62.32	28.1	41.26	19.47
Rajpo07118	emc3	57.04	27.01	23.3	37.07	79.95	80.32	94.11	20.61
Rajpo08505	dual specificity protein phosphatase CDC14A-like isoform X1 (A)	57.03	7.12	9.98	8.63	52.01	47.45	33.22	15.01
Rajpo16436	serine/threonine-protein phosphatase 2B catalytic subunit alpha isoform (A)	56.76	11.84	79.39	58.24	49.78	14.52	39.38	45.08
Rajpo00054	ras GTPase-activating-like protein IQGAP1 (A)	56.68	18.84	54.68	44.88	132.85	234.08	218.37	31.14
Rajpo07085	ezrin-like (A)	56.58	40.74	37.13	42.09	60.52	205.92	176.85	18.08
Rajpo09060	ube2v1	56.58	34.88	40.98	70.05	188.29	76.24	187.35	38.56
Rajpo02116	myosin-7-like (A)	56.52	0.34	184.38	113.93	13.22	3.57	0.03	2.01
Rajpo05122	SGIP1	56.12	88.93	0.81	0.44	3.46	9.44	1.01	1.41
Rajpo02789	psmd14	55.94	19.17	102.56	108.19	139.9	72.37	182.82	190.03
Rajpo18035	mybpc1	55.93	0	518.59	158.65	0.13	0.61	0.05	455.6
Rajpo13203	fsd1	55.88	0.17	6.44	4.6	81.63	2.96	1.9	5.64
Rajpo19251	LOW QUALITY PROTEIN: signal recognition particle 54 kDa protein-like (A)	55.85	56.3	54.35	97.29	140.23	267.52	160.19	64.67
Rajpo14926	LOW QUALITY PROTEIN: TBC1 domain family member 10A-like (A)	55.84	9.51	12.43	23.39	171.18	21.31	63.91	11.3
Rajpo13499	msl3	55.81	27.56	53.48	48.66	191.54	77.6	64.1	59.16
Rajpo00056	MFAP1	55.63	29.5	103.07	84.45	131.97	147.97	106.18	154.43
Rajpo17827	eif4ebp3	55.36	450.07	354.53	375.6	133.8	1139.35	190.29	476.59
Rajpo04166	clptm1l	55.27	58.64	38.36	56.05	88.62	212.27	113.03	28.11
Rajpo07328	ddx46	55.26	47.26	61.43	97.96	98	78.12	164.56	92.71
Rajpo20708	protein phosphatase 1 regulatory subunit 14C-like (A)	55.19	0	105	196.86	22.53	40.04	115.72	91.92
Rajpo11918	pigt	55.14	15.44	31.36	26.33	99.07	78.59	54.09	58.53
Rajpo07621	serine/threonine-protein kinase Sgk1-like isoform X1 (A)	54.91	737.16	28.04	19.88	191.28	5.06	40.02	23.82
Rajpo17241	snrnp200	54.9	20.65	14.52	9.09	42.03	56.26	33.27	21.59
Rajpo18903	gtpbp1	54.68	26.96	33.46	28.73	72.3	57.93	62.88	31.25
Rajpo08765	ctnna1	54.61	30.59	37.86	92.32	76.91	80.99	313.19	43.19
Rajpo18761	excitatory amino acid transporter 1-like (A)	54.59	32.3	0.34	0.18	0.06	4.01	1.21	1.84
Rajpo17417	cdk17	54.19	12.25	5.86	13.24	19.33	18.78	37.29	6.44
Rajpo07795	dihydropteridine reductase (A)	53.92	327.2	15.83	11.3	48.76	24.7	45.55	15.13
Rajpo16175	fh	53.91	108.42	145.71	82.65	107.96	94.47	83.13	126.15
Rajpo14900	thoc5	53.86	19.96	48.87	64.3	67.13	60.4	120.73	76.59
Rajpo09992	gbas	53.84	4.39	307.52	201.07	58.54	52.02	113.6	127.32
Rajpo08204	mdm1	53.83	0.5	1.47	2.11	7.76	14.27	1.81	2.24
Rajpo01553	maf1	53.77	21.27	68.87	49.71	88.35	68.22	64.37	94.25
Rajpo14782	gclc	53.73	15.32	46.4	60.68	43.36	26.88	141.98	16.3
Rajpo06256	akirin-1-like (A)	53.61	21.26	29.39	19.87	186.68	31.7	57.84	40.3
Rajpo14250	rpap3	53.6	17.75	48.03	51.63	65.44	76.86	56.78	90.08
Rajpo20828	naa50	53.49	39.06	199.12	229.07	192.75	44.23	137.04	357.23
Rajpo10997	enpp2	53.49	170.22	2.8	1.84	0.18	0.69	20.76	15.49
Rajpo14779	fbxo9	53.27	37.96	91.61	88.01	56.84	243.49	113.51	112.35
Rajpo14348	gata3	52.76	7.3	27.49	8.69	65.47	403.42	17.14	12.7
Rajpo06809	taf3	52.74	20.08	40.19	26.03	131.58	104.64	26.86	38.05
Rajpo12614	col5a2b	52.19	1.89	43.04	49.25	13.29	1.3	112.28	53.96
Rajpo13351	prolyl endopeptidase isoform X1 (A)	52.17	12.7	13.98	6.06	30.55	27	21.27	21.2
Rajpo05698	UBE2A	52.15	12.16	46.83	53.19	149.93	67.58	61	77.99
Rajpo21260	larp4b	52.07	47.27	11.47	6.06	167.55	48.53	23.9	14.11
Rajpo14341	ASB13	51.78	5.19	14.57	14.76	103.36	30.32	13.14	23.63
Rajpo21293	tmem248	51.7	21.41	21.68	19.61	123.62	69.46	35.31	27.74
Rajpo05075	LOW QUALITY PROTEIN: probable ATP-dependent RNA helicase DDX60 (A)	51.49	25.25	34.46	37.79	110.28	65.23	105.62	35.32
Rajpo16143	UBE2D2	51.45	38.78	144.67	136.56	136.03	74.89	159.57	85.52
Rajpo22770	abl interactor 2 isoform X1 (A)	51.32	7.6	5.92	1.96	61.24	39.84	4.61	16.56
Rajpo21004	ctnnbl1	51.28	14.28	21.46	24.37	51.5	40.18	61.26	27.23
Rajpo08518	biogenesis of lysosome-related organelles complex 1 subunit 1 (A)	51.26	47.73	169.28	176.19	189.36	82.81	87.37	72.51
Rajpo09606	wee1	51.24	40.67	29.61	28.28	38.14	57.83	58.41	33.58
Rajpo21820	ncbp3	51.1	22.22	68.19	56.65	59.8	104.16	67.7	68.16
Rajpo18453	NENF	51.02	6.35	72.19	99.19	186.25	13.73	152.08	23.53
Rajpo19815	trim2a	51.01	0.19	0.81	0.3	33.44	23.2	1.93	2.45
Rajpo15717	ik	50.5	26.39	32.46	19.51	166.04	86.76	63.31	48.18
Rajpo18121	eif4e	50.41	45.91	44.66	74.74	140.28	56.9	147.17	43.29
Rajpo19708	ifrd1	50.4	59.51	74.2	119.78	88.81	47.94	236.6	72.8
Rajpo01909	sae1	50.39	25.07	28.67	24.6	57.81	42.57	71.09	61.82
Rajpo21790	pak5	50.37	0.18	0.54	0.07	28.08	0.13	0.02	0.12
Rajpo13356	spag9b	50.25	7.35	17.16	11.42	28.45	21.28	16.16	44.7
Rajpo00824	hadhb	50.23	158.69	75.23	73.49	120.03	73.83	109.31	73.24
Rajpo04156	galnt1	49.98	24.15	14.05	34.43	83.92	8.46	142.9	19.42
Rajpo06096	rars	49.86	27.91	46.25	34.69	78.99	92.68	55.67	42.93
Rajpo05633	cog6	49.77	33.96	33.89	22.55	127.57	77.82	58.44	40.59
Rajpo12695	snrkb	49.63	12.25	37.38	14.99	15.64	5.03	11.31	20.88
Rajpo18014	osbpl8	49.62	5.2	2.62	3.04	28.59	7.35	9.84	4.63
Rajpo13604	ubiquinol-cytochrome-c reductase complex assembly factor 1 (A)	49.55	13.22	63.59	24.78	43.38	32.73	24.16	80.08
Rajpo05656	atad1b	49.34	30.61	53.57	46.11	95.19	80.71	52.18	45.69
Rajpo14372	Bardet-Biedl syndrome 4 protein isoform X1 (A)	49.23	7.75	14.55	13.07	80.36	34.67	26.72	20.19
Rajpo22225	asmt	49.08	0	0	0	0.15	1.37	0	0
Rajpo16927	cytoplasmic dynein 1 intermediate chain 2-like isoform X1 (A)	48.85	15.79	54	52.28	60.47	45.38	95.87	57.62
Rajpo18942	protein-L-isoaspartate(D-aspartate) O-methyltransferase-like (A)	48.83	29.43	125.1	137.66	86.6	81.72	53.17	273.65
Rajpo14841	BCKDHB	48.82	35.74	155.27	100.84	130.4	50.01	169.62	49.96
Rajpo14893	tax1bp1	48.76	41.45	31.34	32.3	87.26	67.64	47.45	56.45
Rajpo11536	mtss1	48.64	31.16	10.53	5.27	15.71	35.28	3.88	11.14
Rajpo10480	programmed cell death protein 4-like (A)	48.59	54.29	103.07	97.66	108.27	253.19	46.5	149.3
Rajpo18107	calcium/calmodulin-dependent protein kinase type II subunit delta (A)	48.51	24.97	29.7	36.53	4.57	18.98	59.13	10.9
Rajpo04229	calcium/calmodulin-dependent protein kinase type II subunit beta (A)	48.44	5.36	65.04	42.05	12.52	9.94	11.1	93.07
Rajpo06516	atpaf2	48.43	23.03	93.89	107.16	127.41	66.62	120.38	51.67
Rajpo15457	fam53a	48.35	4.9	8.81	8.29	253.88	15.67	12.4	22.8
Rajpo05747	cdk9	48.3	39.41	19.94	25.72	134.06	51.79	77.69	29.22
Rajpo00549	pum1	48.27	16.96	12.59	6.63	25.43	26.45	19.82	24.23
Rajpo04438	CCR4-NOT transcription complex subunit 3 isoform X1 (A)	48.15	26.47	25.77	24.31	383.46	97.39	59.39	22.39
Rajpo12066	gpam	48.07	10.22	4.48	2.47	15.52	17.01	3.18	8.01
Rajpo10221	zfyve27	48.02	14.63	32.35	32.72	46.87	82.7	54.33	51.37
Rajpo02553	ccdc6b	47.97	16.24	25.88	20.39	235.79	106.43	39.07	54.56
Rajpo16292	cyth3a	47.97	17.2	22.97	22.73	30.83	46.76	50.03	31.91
Rajpo10297	GTPase HRas (A)	47.93	9.67	8.74	8.51	65.63	3.01	33.82	21.23
Rajpo14159	pgm1	47.89	30.7	1030.99	888.45	44.56	17.95	31.81	286.14
Rajpo17836	dual specificity protein kinase CLK4-like (A)	47.81	26.55	56.33	106.05	133	156.96	103.14	59.67
Rajpo02802	pkp4	47.78	8.17	14.23	31.18	13.63	43.25	54.54	11.02
Rajpo07141	dync1li2	47.69	14.42	8.79	11.7	47.99	22.35	57.29	16.56
Rajpo19477	dnajc7	47.47	26.12	76.86	86.66	141.83	92.62	136.33	71.59
Rajpo12607	itgav	47.38	10.53	15.19	9.15	25.85	43.74	19.94	17.65
Rajpo00844	rab8a	47.3	37.34	3.78	4	64.8	26.6	30.56	4.01
Rajpo07884	histone deacetylase 2 (A)	47.25	24.3	13.45	18.4	87.87	49.71	70.71	16.45
Rajpo09493	plpp3	47.15	0.98	7.06	11.55	18.39	2.65	24.77	30.49
Rajpo03745	clint1	47.12	50.27	36.56	35.63	210.25	215.76	111.19	40.08
Rajpo05042	atl1	47.03	45.35	16.72	17.18	88.79	45.72	65.5	30.92
Rajpo10744	slc39a9	46.83	26.77	45.26	49.27	56.37	48.15	90.15	19.49
Rajpo00478	vps37b	46.75	42.57	40.44	44.3	192.53	144.11	188.29	53.35
Rajpo19969	zinc finger CCCH domain-containing protein 18-like (A)	46.7	17.45	41.53	33.77	121.89	41.86	57.55	61.49
Rajpo11438	flot2	46.64	18.84	23.5	11.33	15.9	22.49	21.82	39.31
Rajpo14916	GATS-like protein 2 (A)	46.62	16.14	20.72	20.17	177.62	60.25	55.94	19.26
Rajpo21429	sh3kbp1	46.62	24.08	8.69	4.41	42.62	42.35	19.56	10.61
Rajpo04256	homeodomain-interacting protein kinase 1 isoform X1 (A)	46.59	12.21	2.05	1.12	6.06	7.14	3.96	4.84
Rajpo14688	prpf6	46.55	14.48	26.16	31.97	50.76	32.22	55.75	39.56
Rajpo03217	ubiquitin-conjugating enzyme E2 E1 (A)	46.54	13.86	26.72	36.88	130.85	57.3	98.02	39.36
Rajpo15157	tox	46.52	11.54	0.72	0.46	44.75	2.58	1.2	0.49
Rajpo04505	WD repeat domain phosphoinositide-interacting protein 1-like isoform X1 (A)	46.24	18.62	76.15	58.58	50.62	65.02	22.25	218.18
Rajpo12373	abcf2	46.03	11.55	21.25	21.1	200.44	13.99	56.44	18.04
Rajpo15571	strn	45.74	17.91	12.11	14.68	26.57	28.78	50.2	15.61
Rajpo01449	transducin-like enhancer protein 3 isoform X1 (A)	45.61	8.95	15.37	11.03	26.27	72.84	25.48	39.64
Rajpo09227	tcerg1	45.59	26.2	34.05	37.39	88.76	99.6	58.68	44.33
Rajpo18120	metap1	45.5	59.78	104.49	93.53	140.65	162.05	144.97	103.4
Rajpo17756	apeh	45.35	18.94	15.23	16.12	103.22	21.89	56.09	9.55
Rajpo02234	znf608	45.33	6.04	2.43	0.67	29.73	17.49	1.88	5.5
Rajpo16041	calcium-activated potassium channel subunit alpha-1-like (A)	45.26	0.16	14.72	20.85	7.31	1.43	12.42	22.24
Rajpo01617	atp6v0a1	45.24	23.16	36.28	36.92	116.7	26.9	58.12	30.1
Rajpo13724	caska	45.23	33.82	10.22	29.55	29.44	54.21	76.47	11.57
Rajpo12661	aph1a	45.09	35.02	82.88	182.56	106.92	56.58	177.4	51.77
Rajpo15058	cyfip1	45.07	10.54	11.98	14.75	57.64	28.01	69.52	17.63
Rajpo02873	rgmd	45.02	0.57	59.07	32.2	130.37	19.76	7.86	18.69
Rajpo17824	ankhd1	44.78	15.62	21.45	17.2	148.15	38.74	21.56	13.62
Rajpo19142	med8	44.77	20.1	51.21	54.43	154.01	128.89	74.05	84.12
Rajpo06698	cherp	44.61	25.69	20.75	11.9	148.42	97.35	34.59	30.64
Rajpo02013	col27a1b	44.6	2.26	2.32	1.69	2.43	1.39	1.75	0.77
Rajpo10207	mgea5	44.52	15.6	23.03	18.07	67.93	62.81	27.59	14.87
Rajpo10477	etf1	44.39	23.65	24.98	25.71	66.52	30.21	99.26	18.1
Rajpo13751	arl6	44.14	4.51	11.62	12.79	17.8	19.49	6.11	14.98
Rajpo09719	smad7	44.1	47.9	10.21	11.94	65.62	187.43	22.26	38.57
Rajpo00861	csnk2a1	43.99	21.78	67.15	45.36	151.67	49.71	77.21	114.53
Rajpo19933	chloride intracellular channel protein 4 isoform X1 (A)	43.91	18.67	27.4	9.31	11.79	1.8	35.59	33.8
Rajpo21145	LSM2	43.73	27.39	69.94	68.52	320.47	63.92	114.55	72.5
Rajpo17698	prkcsh	43.52	66.33	12.74	5.58	115.56	109.76	55.4	12.84
Rajpo00790	aimp1	43.43	37.16	151.4	222.57	212.71	118.58	165.39	281.64
Rajpo06485	arhgap21	43.26	8.11	11.09	23.32	16.28	32.19	37.04	16.91
Rajpo13385	ADP/ATP translocase 1 (A)	43.19	0	3057.46	1641.78	46.75	3.63	0	1003.35
Rajpo16407	vps35l	43.19	12.38	15.61	20.08	105.57	42.01	33.9	15.09
Rajpo17039	SRSF protein kinase 2-like (A)	43.16	16.36	15.41	21.08	79.34	30.33	45.59	19.44
Rajpo11936	rtfdc1	43.08	26.05	65.99	81.98	113.25	87.71	137.62	83.66
Rajpo20337	fermt2	43.06	21.94	63.22	33.31	73.27	7.43	28.18	178.52
Rajpo19583	protein lin-7 homolog C (A)	43	8.12	4.56	3.88	8.2	8.69	35.6	14.55
Rajpo13141	bcas2	42.96	17.12	23.77	54.67	60.56	22.49	120.24	18.59
Rajpo14647	cadherin-4 isoform X1 (A)	42.95	4.26	6.57	2.23	0.26	0.61	0.29	11.49
Rajpo14637	guanine nucleotide-binding protein G(i) subunit alpha-2 (A)	42.8	11.28	4.66	2.85	30.95	5.2	44.98	7.39
Rajpo12749	fibrillin-1-like (A)	42.72	2.38	7.95	4.85	4.76	1.98	29.81	14.83
Rajpo05957	cytosolic purine 5'-nucleotidase isoform X1 (A)	42.72	40.88	38.44	12.45	21.23	20.23	12.1	15
Rajpo13330	cab39	42.54	23	17.32	11.42	58.29	44.72	31.42	52.05
Rajpo05414	IPO4	42.47	17.34	19.03	14.11	50.22	32.37	31.56	8.24
Rajpo08665	cltcl1	42.28	4.92	16.23	8.06	147.64	11.32	10.79	17.41
Rajpo21368	dars1	42.19	23	53.31	91.61	119.1	89.33	234.57	49.1
Rajpo02826	pex14	42.16	19.91	12.2	9.54	67.06	19.47	13.74	24.77
Rajpo10647	LOW QUALITY PROTEIN: AP-3 complex subunit mu-2-like (A)	42.15	10.22	9.54	4.25	52.66	13.7	11.87	9.29
Rajpo11133	ISOC1	42.11	22.83	66.37	113.58	73.39	149.64	157.69	46.3
Rajpo08540	chloride intracellular channel protein 4 isoform X1 (A)	42.07	0	2.67	4.11	0.56	0	2.72	3.03
Rajpo20985	ube2q1	41.98	10.6	24.97	31.42	76.25	59.09	43.49	88.46
Rajpo10334	LOW QUALITY PROTEIN: beta-1-syntrophin-like (A)	41.89	78.99	53.44	32.96	39.47	45.61	33.93	61.08
Rajpo08491	LOW QUALITY PROTEIN: lamin-B1-like (A)	41.59	14.28	39.6	72.6	108.84	26.89	128.58	12.66
Rajpo22525	tetraspanin-7-like (A)	41.5	348.18	23	16.39	176.33	44.31	45.8	20.63
Rajpo20479	lzic	41.4	15.3	74.41	114.47	120.9	39.22	136.84	82.62
Rajpo19278	zfyve21	41.22	23.49	16.49	17.68	46.65	51.89	37.02	28.41
Rajpo06992	PLS3	41.2	71.28	16.53	35.08	49.84	4.87	232.92	16.08
Rajpo15528	matrin-3-like isoform X1 (A)	41.16	15	11.06	14.34	66.13	17.66	35.37	15.23
Rajpo18287	probable carboxypeptidase PM20D1 precursor (A)	41.14	4.82	20.98	7.26	5.38	8.43	12.27	25.54
Rajpo09650	pid1	41.12	256.08	18.38	8.72	56.23	9.39	37.37	20.29
Rajpo16014	ndst2	41.06	51.99	16.94	6.95	76.18	6.67	12.22	11.01
Rajpo18728	pi4ka	41	11.54	11.05	7.35	39.06	37.12	13.6	8.4
Rajpo15469	ergic1	40.99	22.78	31.89	71.17	57.55	78.96	134.18	13.96
Rajpo18123	rap1gds1	40.86	3.74	14.84	11.75	83.38	11.47	24.25	10.28
Rajpo18122	tspan5	40.72	6.15	7.86	5.66	12.12	5.81	30.01	30.33
Rajpo08324	GABARAPL2	40.69	10.55	48.6	68.02	55.04	47.3	50.72	61.17
Rajpo11194	ADP-ribosylation factor-like protein 8A (A)	40.64	34.99	14.83	27.89	35.64	53.06	79.13	28.48
Rajpo11383	LOW QUALITY PROTEIN: IQ motif and SEC7 domain-containing protein 1-like (A)	40.61	26.42	1.52	0.48	13.09	3.99	2.72	4.8
Rajpo16529	luc7l2	40.58	19.79	29.16	23.03	49.67	76.13	34.7	55.02
Rajpo10271	spsb3	40.47	22.31	56.87	83.39	152.81	66.01	135.29	46.37
Rajpo10970	peptidyl-prolyl cis-trans isomerase FKBP5-like (A)	40.42	9.99	47.76	64.56	39.21	11.19	51.66	10.07
Rajpo15072	ube3a	40.41	15.08	75.73	60.63	73.33	41.29	50.84	90.3
Rajpo11638	VAV2	40.34	4.79	8.65	5.67	18.74	8.62	4.92	3.6
Rajpo14892	hibadh	40.28	15.93	146.22	98.5	41.46	34.4	53.17	49.74
Rajpo06930	znf148	40.01	19	10.19	6.64	16.06	18.11	13.83	22.5
Rajpo00602	adam17b	40	18.55	25.19	37.76	46.33	38.32	75.39	22.31
Rajpo05935	c1d	39.98	26.52	224.94	246.25	177.88	141.25	113.6	342.92
Rajpo07871	fragile X mental retardation syndrome-related protein 1-like (A)	39.87	10.23	124.86	72.35	32.41	17.02	13.62	240.18
Rajpo11695	thoc2	39.84	21.49	46.32	41.82	78.77	89.14	71.24	23
Rajpo14972	sec23b	39.84	62.83	38.32	83.72	102.63	231.38	183.77	12.51
Rajpo14309	homeobox protein Meis1-like isoform X1 (A)	39.82	1.17	26.02	19.05	39.61	2.83	2.51	1.04
Rajpo03655	adcy8	39.79	0.85	3.31	2.64	0.89	15.67	1.31	0.05
Rajpo14576	nuclear factor NF-kappa-B p105 subunit-like (A)	39.79	16.89	42.48	41.89	144.92	54.65	74.97	59.02
Rajpo18641	ilvbl	39.75	60.04	30.5	34.85	74.79	253.83	52.17	26.39
Rajpo22965	mrpl3	39.75	15.35	45.37	36.51	189.04	56	56.77	44.34
Rajpo19101	slc35b1	39.65	44.58	28.02	36.43	48.32	160.74	88.28	30.74
Rajpo01211	rtf1	39.64	18.56	51.41	47.57	117.82	29.65	53.61	33.62
Rajpo16578	protein tyrosine phosphatase type IVA 1-like (A)	39.5	44.55	308.86	188.62	37.75	16.65	66.94	131.35
Rajpo19249	sec23a	39.43	49.81	24.88	27.35	85.8	38.54	110.57	27.65
Rajpo00228	glycoprotein endo-alpha-1,2-mannosidase-like protein isoform X1 (A)	39.39	1.06	24.2	17.26	40.02	17.32	7.75	28.52
Rajpo21977	RBBP6	39.38	14.07	50.09	49.8	51.58	68.91	24.88	16.74
Rajpo01977	si:dkey-234i14.6	39.3	3.79	2.06	2.62	75.17	16.64	3.94	2.71
Rajpo12688	nup93	39.13	6.57	14.25	19.99	77.86	16.86	50.8	12.34
Rajpo10940	rcan2	39.09	2.59	10.26	1.4	2.06	1.45	2.18	2.25
Rajpo07532	ras-related protein Rab-8B (A)	39.07	17.36	7.83	4.65	12.86	15.26	11.09	22.09
Rajpo11827	zeb2	38.84	5.48	18.48	10.24	6.68	1.72	12.7	27
Rajpo17652	usp10	38.81	25.15	14.19	18.16	85.48	13.32	82.46	13.21
Rajpo01730	washc2c	38.79	24.74	13.74	9.89	86.12	41.5	27.38	25.59
Rajpo12405	poldip2	38.76	21	118.08	80.93	140.07	110.58	74.51	98.49
Rajpo21327	tRNA selenocysteine 1-associated protein 1-like isoform X1 (A)	38.67	14.2	34.55	31.55	472.3	56.32	43.88	59.56
Rajpo12519	pknox2	38.59	2.1	36.04	18.65	9.02	1.61	8.17	73.63
Rajpo19849	tmem178b	38.49	0	0	0	56.36	3.4	0.11	1.4
Rajpo15279	eftud2	38.47	18.17	22.6	25.33	87	43.93	84.14	30.99
Rajpo21912	fbxl18	38.43	22.12	13.1	9.06	38.39	47.03	22.58	20.38
Rajpo13672	fam214a	38.38	15.45	20.63	24.81	62.21	17.6	34.05	18.4
Rajpo08715	arl8ba	38.21	10.37	12	20.25	91.22	37.31	57.07	24.05
Rajpo02253	OLA1	38.16	24.12	82.57	80.89	73.3	59.13	106.29	86.18
Rajpo01397	dtd1	38.09	20.41	6.19	1.53	5.56	12.62	7.28	9.06
Rajpo02791	RNA-binding motif, single-stranded-interacting protein 1 isoform X2 (A)	38.06	21.31	28.52	23.16	39.25	17.43	72.91	46.27
Rajpo22420	nsg1	38.04	0	0.22	0	13.93	0	0.1	0
Rajpo19161	cwc15	38	26.06	53.81	68.49	187.55	78.45	103.68	99.02
Rajpo06702	calreticulin-like (A)	37.95	359.57	21.29	20.01	50.44	1002.21	168.38	32.32
Rajpo13655	sema6d	37.88	28.71	15.69	10.78	15.63	40.45	53.04	22.33
Rajpo20510	clasp2	37.88	5.44	8.29	6.46	7.88	11.95	12.99	9.99
Rajpo07060	aco1	37.76	42.2	22.07	25.37	53.93	31.1	36.53	28.61
Rajpo03369	etfa	37.74	123.43	193.26	107.93	90.33	63.75	60.53	167.92
Rajpo21284	appbp2	37.68	9.01	17.18	21.64	51.98	19.42	35.56	15.69
Rajpo02847	proton-coupled amino acid transporter 1-like (A)	37.68	9.46	14.73	16.84	22.71	31.64	58.24	16.9
Rajpo05696	2024-09-06	37.64	4.48	8.07	5.92	99.25	4.81	13.12	11.21
Rajpo08718	sumf1	37.61	11.97	7.6	7.9	18.13	44.49	27.28	12.79
Rajpo01946	Lmo3	37.56	0.17	1.6	3.11	60.54	0	0.15	0
Rajpo04878	LOW QUALITY PROTEIN: radixin-like (A)	37.47	11.29	12.85	8.74	144.55	15.92	2.31	12.01
Rajpo08852	mapkap1	37.44	13.29	31.78	34.58	101.74	32.91	61.65	45.1
Rajpo07856	sf3b3	37.41	18.98	41.28	53.01	65.96	36.26	78.1	22.37
Rajpo14406	gpcpd1	37.4	32.58	76.93	82.03	55.13	211.54	161.15	41.04
Rajpo06812	kin	37.32	17.97	24.63	28.22	132.23	64.77	62.19	28.51
Rajpo02731	znf385b	37.23	0.07	1.22	3.15	1.67	32.1	11.14	1.85
Rajpo02837	serine/threonine-protein phosphatase 2A 55 kDa regulatory subunit B gamma isoform isoform X2 (A)	37.19	0.68	2.13	0.87	92.49	0.99	1.53	4.59
Rajpo15868	emc1	37.1	17.89	17.33	11.59	58.04	25.84	28.17	38.98
Rajpo14808	klc1b	37.02	15.13	21.37	14.49	15.01	31.98	71.74	26.32
Rajpo19099	ubtf	36.96	11.63	8.16	5.6	65.98	18.45	18.86	12.32
Rajpo07093	fmr1	36.83	8.45	10.88	13.08	40.31	21.02	34.04	18.81
Rajpo17917	imp3.L, imp3	36.79	25.58	94.13	100.47	188.58	92.56	171.87	92.47
Rajpo07100	LOW QUALITY PROTEIN: semaphorin-3F (A)	36.73	1.28	1.17	0.43	5.09	0.27	3.06	1.46
Rajpo21401	fez2	36.69	13.58	8.13	4.57	20.53	3.5	10.84	10.75
Rajpo21628	E3 ubiquitin-protein ligase RMND5A isoform X1 (A)	36.67	18.67	29.64	53.61	124.55	43.55	64.78	36.06
Rajpo01829	ehbp1	36.65	19.53	10.83	8.72	21.14	18.38	19.16	22.41
Rajpo08849	MVB12B	36.64	20.55	20.43	12.38	30.89	27.29	13.08	28.6
Rajpo08728	anxa7	36.58	12.72	31.25	15.07	9.5	20.99	66.76	41.3
Rajpo04980	tbl1xr1a	36.52	11.09	3.45	1.95	27.4	9.67	15.25	7.67
Rajpo12862	LOW QUALITY PROTEIN: heterogeneous nuclear ribonucleoprotein Q-like (A)	36.42	29.96	15.02	12.19	53.37	31.58	60.69	12
Rajpo22039	blvra	36.4	8.39	26.35	19.73	28.86	12.26	57.58	13.94
Rajpo01610	becn1	36.4	10.29	11.14	10.6	83.69	16.25	24.85	9.47
Rajpo20463	SLC1A2	36.36	1.39	0.06	0	0.17	0	0.75	0.05
Rajpo08871	serine/threonine-protein kinase Nek6 (A)	36.33	47.83	16.79	13.3	64.3	50.61	9.03	46.33
Rajpo10164	DNM2	36.13	23.5	17.72	9.69	53.04	54.45	40.76	12.25
Rajpo21390	NADP-dependent malic enzyme (A)	36.02	2.54	141.05	71.93	221.36	62.02	56.42	117.65
Rajpo12633	cds1	36	2.61	3.88	7.36	7.79	7.35	8.05	3.04
Rajpo19269	MARK3	35.98	11.91	16.54	21.57	53.39	36.55	33.05	22.47
Rajpo13989	tnpo3	35.96	9.93	30.43	20.55	58.63	23.86	38.74	28.83
Rajpo17026	lon protease homolog 2, peroxisomal isoform X1 (A)	35.86	39.68	26.95	27.39	76.53	38.91	38.79	29.94
Rajpo22533	srprb	35.84	39.19	53.05	88.65	191.49	167.28	135.22	35.67
Rajpo05306	CHMP1B	35.79	36.07	46.04	79.4	64.21	57.63	222.94	91.08
Rajpo19460	gosr2	35.75	35.68	30.6	35.48	135.19	57.63	80.73	39.11
Rajpo03919	crbn	35.75	18.98	16.69	10.38	75.24	51.49	27.92	26.44
Rajpo07996	neprilysin-like (A)	35.74	0.09	3.32	2.39	0.56	17.32	4.15	2.61
Rajpo06401	ER lumen protein-retaining receptor 3 (A)	35.69	62.91	7.88	11.4	26.36	108.16	44.41	7.1
Rajpo08906	ephb3	35.63	0.57	1.07	1.42	0.62	1.08	11.04	2.46
Rajpo08550	abhd12	35.54	10.34	14.07	11.15	28.48	30.02	13.45	10.76
Rajpo12760	ptpn21	35.53	8.09	19.11	8.59	15.66	14.88	6.54	26.7
Rajpo18590	atp2b1	35.51	15.68	19.38	15.52	49.75	9.65	20.39	53.39
Rajpo19409	microtubule cross-linking factor 1 isoform X1 (A)	35.5	0.58	10.07	3.79	1.07	0.86	0.75	4.75
Rajpo16024	zmiz1	35.49	12.97	12.22	3.89	18.84	24.2	10.76	14.32
Rajpo01460	golm2	35.48	35.37	13.09	16.24	58.66	51.1	41.83	12.88
Rajpo07671	glb1l2	35.44	56.92	24.17	31.99	57.27	62.49	28.38	47.5
Rajpo22738	voltage-dependent calcium channel gamma-2 subunit (A)	35.36	8.58	2.44	1.48	73.32	0	2.58	0
Rajpo13664	tropomodulin-3-like isoform X1 (A)	35.33	14.53	10.56	14.68	54.81	18.36	80.37	25.39
Rajpo03021	atp2c1	35.32	12.68	8.35	14.79	34.64	15.85	43.81	7.47
Rajpo15451	ctbp1	35.3	19.8	19.5	20.2	45.42	20.96	38.78	14.91
Rajpo01292	LOW QUALITY PROTEIN: phosphatidylinositide phosphatase SAC1-like (A)	35.29	18.24	13.3	24.72	93.56	49.36	143.46	12.83
Rajpo03189	sart3	35.25	13.24	15.04	20.38	42.78	32	39.29	18.29
Rajpo00603	cpsf3	35.14	15.52	23.38	25.73	75.77	46.38	79.13	25.46
Rajpo21889	LOW QUALITY PROTEIN: histone acetyltransferase p300-like (A)	35.14	16.14	9.3	6.37	43.25	33.89	13.23	12.11
Rajpo21255	wdr37	35.04	11.55	34.2	22.56	62.4	20.16	14.87	52.81
Rajpo13504	heatr3	35.03	5.89	32.34	26.34	108.73	31.8	25.07	31.75
Rajpo05913	rab35	34.99	14.54	17.39	21.5	128.62	15.91	91.95	29.08
Rajpo22834	fam98b	34.99	15.12	17.42	22.28	110.73	49.18	81.5	24.2
Rajpo05799	gtf2a1	34.96	11.78	10.39	7.35	61.31	40.99	22.85	28.49
Rajpo19714	immp2l	34.91	19.34	46.83	41.06	108.96	136.81	32.35	98.88
Rajpo22350	lhpp	34.91	1	151.07	172.62	64.94	28.92	60.3	118.94
Rajpo13874	eipr1	34.9	7.58	38.36	40.31	81.82	23.58	58.97	27.05
Rajpo17117	glycogen synthase kinase-3 beta (A)	34.89	13.91	4.4	1.39	12.12	10.89	18.56	5.94
Rajpo12523	slc37a2	34.77	35.85	42.88	54.37	128.62	70.64	94.57	13.36
Rajpo06033	rras2	34.75	8.37	11.64	13.92	56.38	27.65	32.41	11.44
Rajpo15382	dcps	34.73	24.75	28.45	19.25	80.15	51.28	63.77	48.65
Rajpo14691	uridine-cytidine kinase-like 1 isoform X1 (A)	34.72	31.38	29.39	20.53	29.86	20.87	6.07	27.25
Rajpo14969	exportin-1 (A)	34.68	14.66	8.85	12.32	62.4	32.88	33.04	12.31
Rajpo13799	probable acyl-CoA dehydrogenase 6 (A)	34.67	143.46	13.29	13.26	24.74	67.79	33.99	25.87
Rajpo11648	col5a1	34.59	1.95	13.44	6.4	1.44	0.59	19.38	23.89
Rajpo22200	pigk	34.58	24.04	31.09	64.57	91.13	116.52	64.03	66.3
Rajpo17447	atp11a	34.45	5.44	3.26	3.84	24.05	6.49	8.24	0.87
Rajpo20733	ptgr2	34.4	53.72	20.61	13.45	155.41	65.14	25.45	21.58
Rajpo17835	ras-GEF domain-containing family member 1C-like (A)	34.3	0.07	0.34	0.51	1.58	0.32	5.61	0.59
Rajpo19465	psmd11	34.28	23	47.66	54.64	138.32	20.04	137.79	112.62
Rajpo14168	DNAJC6	34.22	0.51	0.35	0.1	143.32	0.05	0.35	0.14
Rajpo08876	spermatid perinuclear RNA-binding protein isoform X1 (A)	34.19	6.65	18.45	32.25	40.57	15.84	40.56	6.42
Rajpo17559	LOW QUALITY PROTEIN: fragile X mental retardation syndrome-related protein 1-like (A)	34.16	9.26	128.96	82.44	82.39	24.45	44.26	169.16
Rajpo12738	wars1	34.07	16.58	34.45	41.77	99.05	153.11	110.37	35.35
Rajpo19658	meis2a	34.07	0.1	1.48	2.58	11.91	2.09	4.47	2.78
Rajpo13184	fip1l1	34.06	16.59	20.55	25.01	128.48	81.9	48.92	64.91
Rajpo13136	F-actin-capping protein subunit alpha-1-like (A)	34.02	38.52	25.17	32.13	71.23	63.62	109.37	26.04
Rajpo22582	edem2	34.01	5.17	12.59	18.83	28.71	35.89	35.21	5.44
Rajpo01780	wasl	33.99	19.38	38.62	29.97	109.96	61.64	45.62	42.47
Rajpo17028	PHKB	33.92	7.27	145.65	136.48	35.25	41.4	33.53	68.54
Rajpo12554	pam	33.9	13.24	11.87	25.01	78.42	251.95	116.47	14.56
Rajpo09732	polb	33.89	6.84	22.25	14.29	24.66	20.18	31.77	28.72
Rajpo07472	cstf2	33.89	12.15	17.77	16.25	130.44	34.25	61.75	15.14
Rajpo19087	adhesion G protein-coupled receptor B3-like isoform X1 (A)	33.82	0.14	0.87	1.01	3.2	0.32	0.43	0.25
Rajpo02258	wipf1	33.8	34.37	33.48	25.41	426.91	283.16	88.58	27.24
Rajpo22309	ccdc12	33.76	12.93	45.55	30.11	108.85	19.17	71.98	80.25
Rajpo15739	wwc3	33.76	10.54	12.86	9.33	13.73	13.8	18.69	16.69
Rajpo13816	gabbr2	33.71	2.52	0.48	2.47	30.84	0	0.45	0
Rajpo12059	smc3	33.47	15.14	16.97	23.39	87.4	42.98	63.03	20.57
Rajpo14099	EEPD1	33.39	83.56	51.33	44.9	9.03	13.13	17.38	40.55
Rajpo21578	vps4b	33.31	16.76	35.17	66.35	96.95	37.42	212.2	31.72
Rajpo21783	jag1	33.23	0.2	6.83	3.25	24.31	2.88	25.33	8.48
Rajpo14766	LOW QUALITY PROTEIN: myomesin-2-like (A)	33.22	0.6	1075.83	753.95	15.34	1.36	0.58	667.05
Rajpo12030	probable E3 ubiquitin-protein ligase TRIM8 (A)	33.18	12.17	15.68	15.53	116.93	32	67.98	23.88
Rajpo02606	RNA/RNP complex-1-interacting phosphatase-like (A)	33.08	20.31	17.97	18.42	132.13	32.23	73.74	27.38
Rajpo22147	LOW QUALITY PROTEIN: ankyrin repeat domain-containing protein 33B-like (A)	33.04	10.05	0.32	0.21	1.02	0	0.6	0.25
Rajpo04479	MMEL1	33.04	14.63	21.59	24.18	39.61	2.49	28.63	0.11
Rajpo08513	insulin-like growth factor-binding protein 5 (A)	32.88	234.56	34.26	168.81	146.84	5.95	614.18	23.83
Rajpo00322	ARMC8	32.83	6.49	19.38	21.71	70.48	19.3	40.2	18.99
Rajpo07866	5'-AMP-activated protein kinase subunit gamma-2 (A)	32.82	13.95	19.98	10.91	97.89	27.16	3.92	9.97
Rajpo15656	nubp1	32.82	23.24	14.85	40.28	85.52	49.61	146.82	16.96
Rajpo02567	wdr3	32.82	12.4	23.89	23.99	48.4	32.24	39.27	71.23
Rajpo18006	AP-1 complex subunit sigma-2 (A)	32.77	18.33	20.27	19.9	56.45	30.21	39.45	25.92
Rajpo12259	adam10a	32.76	57.53	18.58	29.34	36.44	24.67	109.17	29.71
Rajpo11879	cat	32.71	838.42	29.73	22.9	268.61	59.67	18.62	50.65
Rajpo17109	OSCP1	32.69	0.19	2.96	3.06	33.41	6.34	5.04	13.07
Rajpo11371	vsnl1	32.6	0	1.18	0	11.25	5.86	1.2	0
Rajpo02867	sgta	32.6	11.94	26.93	23.45	53.08	9.37	43.05	41.4
Rajpo17807	forkhead box protein O3 (A)	32.51	7.98	19	6.55	1.11	20.23	11.6	22.59
Rajpo21148	plppr1	32.43	0.4	2.07	3.16	0.91	9.19	0.7	1.27
Rajpo22709	rbbp4	32.36	12.68	48.19	82.69	197.7	30.23	227.89	27.38
Rajpo21951	cadherin-18-like isoform X1 (A)	32.32	0.02	0	0	6.33	0	0.04	0.04
Rajpo11983	tcf25	32.29	26.63	65.24	65.53	108.77	72.69	65.65	117.53
Rajpo22706	bsdc1	32.27	13.62	24.71	24.42	93.69	36.85	37.07	27.56
Rajpo11997	ndel1	32.27	53.03	47.18	36.37	86.58	24.26	53.6	57.64
Rajpo12330	smad6	32.21	4.01	4.07	6.28	67.7	17.22	5.09	5.25
Rajpo19771	guanine nucleotide-binding protein G(s) subunit alpha-like isoform X1 (A)	32.2	4.76	9.34	7.36	48.42	17.19	5.01	14.79
Rajpo08776	cpeb4b	32.13	8.52	13.47	5.75	3.78	29.87	7.45	28.59
Rajpo21095	kpna3	32.1	13.39	29.04	20.43	24.04	25.52	37.15	79.59
Rajpo19276	klc1	32.08	9.08	10.87	8.57	10.53	16.4	23.41	14.58
Rajpo13094	DACH1	32.06	1.08	4.46	1.39	1.99	28.78	0.83	28.4
Rajpo17567	mccc1	32.04	13.81	35.62	14.24	13.52	6.8	15.91	14.98
Rajpo13205	sh3gl1	31.99	16.4	5.28	3.13	26.28	10.44	23.14	10.16
Rajpo04089	rad51ap1	31.96	42.94	37.38	40.08	53.21	47.09	77.01	60.45
Rajpo06324	ripor1	31.94	15.86	10.18	5.31	31.45	23.28	54.65	10.87
Rajpo16720	ubap1	31.86	23.37	18.24	24.29	130.82	35.33	98.87	21.08
Rajpo14943	anapc7	31.86	7.59	11.72	14.52	57.51	25.75	50.02	13.77
Rajpo13928	LOW QUALITY PROTEIN: E3 ubiquitin-protein ligase UHRF1 (A)	31.84	8.48	10.97	13.87	53.62	53.92	42.33	10.79
Rajpo14967	usp34	31.83	12.36	10.36	8.22	48.09	45.4	20.03	9.39
Rajpo00823	hadha	31.71	100.66	46.87	39.96	110.7	55.47	60.48	36.1
Rajpo17443	sugt1	31.66	29.38	56.81	78.86	100.69	92.27	84.74	70.38
Rajpo14294	SWI/SNF-related matrix-associated actin-dependent regulator of chromatin subfamily D member 2 isoform X1 (A)	31.63	4.15	1.51	1.8	24.73	18.25	15.04	1.57
Rajpo09039	snRNA-activating protein complex subunit 3-like (A)	31.58	12.59	30.94	48.35	87.92	41.78	53.2	21.73
Rajpo19775	NAPG	31.53	14.4	13.49	17.76	99.68	17.13	23.16	18.74
Rajpo15485	complexin-2 (A)	31.49	0	2.93	3.85	1.86	1.16	0.34	2.84
Rajpo06629	transcription factor 12-like isoform X1 (A)	31.48	10.28	21.19	12.21	35.93	13.13	46.53	24.58
Rajpo14827	b3gat2	31.46	0.22	10.61	9.23	72.15	2.6	5.75	4.37
Rajpo12237	afdn	31.42	13.24	12.5	10.75	19.58	44.12	18.41	9.92
Rajpo22078	CELF1	31.28	9.74	14.39	5.79	64.99	51.68	9.05	15.49
Rajpo15123	micu2	31.22	47.54	101.41	125.3	113.37	120.18	178.02	56.97
Rajpo12487	gtf2ird1	31.18	7.92	22.1	24.16	50.7	19.14	16.52	27.29
Rajpo16046	erlin1	31.18	131.89	41.92	60.21	83.23	37.31	140.01	44.75
Rajpo16066	dnajb12a	31.13	7.61	19.15	16.76	32.78	25.88	29.44	24.27
Rajpo08203	RAP1B	31.02	5.87	5.32	2.35	28.06	5.91	16.6	11.79
Rajpo22296	limbic system-associated membrane protein (A)	30.89	0.32	0.4	1.06	5.38	0.15	1.72	0
Rajpo07808	acsl3	30.83	16.34	8.38	11.62	52.58	32.19	59.78	12.23
Rajpo10790	megf10	30.79	4.69	5.73	2.97	2.45	0.24	1.09	9
Rajpo18864	anapc10	30.78	8.91	83.1	76.81	62.52	18.98	69.25	57.2
Rajpo09262	plexin domain-containing protein 2-like (A)	30.76	1.86	11.99	12.27	3.72	0	17.58	10.46
Rajpo03953	cth	30.68	454.95	95.29	84.18	57.9	208.32	132.41	22.94
Rajpo06546	med17	30.65	16.82	14.34	24.58	105.18	23.92	59.06	22.85
Rajpo09263	plxdc2b	30.6	1.92	7.41	9.08	3.79	0.63	24.26	10.43
Rajpo05259	plaa	30.58	7.91	27.03	38.24	86.35	29.15	61.86	39.48
Rajpo09318	synaptosomal-associated protein 25 (A)	30.57	0	0	0.15	1.13	0	0.09	0.18
Rajpo00718	slc49a4	30.57	4.25	12.28	6.8	21.52	8.02	6.56	23.28
Rajpo07255	eps8	30.54	27.21	2.06	3.42	28.96	93.08	9.14	1.68
Rajpo00795	hadh	30.53	216.3	122.08	88.8	133.06	190.65	60.83	160.8
Rajpo09995	tbl2	30.51	30.14	18.6	23.76	77.42	24.55	53.6	18.22
Rajpo11399	LOW QUALITY PROTEIN: fatty aldehyde dehydrogenase-like (A)	30.48	38.61	11.43	7.45	25.17	120.63	20.32	11.61
Rajpo14706	E3 ubiquitin-protein ligase RNF149 (A)	30.47	9.96	8.43	30.92	28.62	9.71	73	3.86
Rajpo13002	tecr	30.43	0.05	1168.2	581.07	0.44	0	0.04	331.99
Rajpo00641	LOW QUALITY PROTEIN: seizure 6-like protein (A)	30.43	0	0.55	0.1	0	0.46	0	0.08
Rajpo13842	colgalt1b	30.43	4.89	7.75	4.34	30.37	14.17	12.68	12.2
Rajpo10711	ube2g2	30.39	10.23	19.11	22.01	28.55	36.14	33.18	52.74
Rajpo01906	PAK4	30.38	11.75	14.87	9.68	32.64	28	12.79	20.67
Rajpo08851	pbx3	30.37	3.73	6.32	3.23	11.56	10.83	4.61	3.79
Rajpo15495	faf2	30.32	16.81	22.09	25.67	168	38.1	53.35	10.8
Rajpo19433	eif2a	30.31	23.14	53.15	61.6	68.02	43.03	80.48	57.64
Rajpo20100	uba2	30.27	9.89	13.75	11.95	51.71	16.92	49.62	15.15
Rajpo18788	ras-related protein Rab-11B (A)	30.23	7.16	7.41	11.07	100.6	12.77	41.37	12.26
Rajpo22198	pigk	30.22	19.16	29.44	31.92	65.63	98.42	38.71	42.02
Rajpo05888	eif4enif1	30.21	18.67	11.27	10.84	703.68	31.73	17.82	14.34
Rajpo10802	rnaseh2b	30.11	32.75	27.78	57.19	154.1	40.07	204.82	16.17
Rajpo10998	taf2	30.09	8.9	15.41	17.2	32.9	35.71	25.5	8.81
Rajpo08187	protein ERGIC-53-like (A)	30.07	29.06	12.84	10.27	37.42	102.03	19.9	14
Rajpo10662	thap4	30.05	13.97	37.09	59.88	87.8	85.38	120.66	25.23
Rajpo19329	supt6h	30.05	18.48	11.57	5.92	32.88	41.96	16.73	11.95
Rajpo07259	cald1	30.05	6.67	9.23	2.72	15.26	3.57	14.92	5.96
Rajpo13413	homer1	30.04	126.88	45.72	19.71	42.57	8.57	14.76	60.09
Rajpo04470	gfpt1	29.99	22.91	11.83	29.83	11.81	11.79	88.4	7.51
Rajpo17413	lta4h	29.99	25.83	20.21	15.91	170.47	35.52	38.98	29.18
Rajpo19005	prpf38b	29.99	15.09	75.19	88.65	133.6	59.02	89.71	24.74
Rajpo13018	ras-related protein Rab-5B (A)	29.99	4.65	8.5	4.54	52.66	15.67	20.66	18.49
Rajpo18387	ppp2r5ea	29.85	6.09	7.66	8.66	19.03	11.01	21.97	5.38
Rajpo13683	cops2	29.78	13.64	24.23	28.04	147.21	34.55	50.85	28.99
Rajpo08959	parn	29.69	12.06	14.12	20.47	91.32	43.81	76.61	20.27
Rajpo07116	usp4	29.67	14.28	33.98	39.5	75.58	43.02	110.21	32.2
Rajpo19655	fxn	29.64	22.46	72.23	77.73	88.36	44.53	57.54	54.93
Rajpo15949	aes	29.61	13.99	9.58	7.16	39.23	21.26	16.62	18.71
Rajpo17187	opa1	29.58	10.78	28.09	19.9	63.91	32.14	28.07	33.79
Rajpo17777	bcl2l13	29.56	7.04	19.34	22.17	73.54	20.94	45.71	15.71
Rajpo19109	zinc finger protein 652-like (A)	29.56	45.27	14.42	9.75	31.98	26.83	20.47	17.16
Rajpo14123	dhx9	29.55	12.35	7.69	7.08	23.39	18.8	35.44	5.35
Rajpo15314	ddr2	29.49	1.74	2.54	2.09	4.06	6.5	16.34	13.58
Rajpo09938	ptprfa	29.46	28.4	11.32	41.67	9.01	37.77	97.91	6.69
Rajpo09459	RUN and FYVE domain-containing protein 2-like (A)	29.38	15.13	6.05	6.43	41.72	25.71	9.19	8.49
Rajpo21317	galnt17	29.32	0.08	1.34	0.47	0.55	1.35	2.84	0.69
Rajpo06142	BRCA2-interacting transcriptional repressor EMSY-like (A)	29.3	15.43	12.09	7.91	66.09	25.61	14.2	15.97
Rajpo16215	rnf14	29.27	20.72	30.82	18.68	75.44	10.53	23.27	25
Rajpo01968	LOW QUALITY PROTEIN: cadherin-11 (A)	29.22	39.22	2.81	0.19	3.72	2.31	1.68	2.81
Rajpo04023	rcl1	29.2	11.8	27.84	31.91	88.41	29.53	42.64	27.83
Rajpo13763	slc12a4	29.16	5.06	14.29	17.56	35.74	17.81	23.77	14.19
Rajpo20487	kinesin-like protein KIF1B (A)	29.14	1.33	7.6	2.77	2.38	0.89	0.89	11.3
Rajpo07939	cln5	29.14	8.05	2.49	3.4	5.83	10.96	14.14	4
Rajpo20541	trafd1	29.13	21.48	8.36	7.96	84.49	12.16	47.43	11.95
Rajpo01298	ankhb	29.11	10.74	3.05	1.01	20.51	0	1.54	0.5
Rajpo16020	zcchc24	29.1	25.68	18.85	7.7	7.55	19.13	2.28	33.97
Rajpo08865	olfml2a	29.1	2.03	6.79	2.53	10.85	2.11	6.34	6.15
Rajpo04136	stag2b	29.06	14.55	20.69	23.51	23.9	40.41	68.38	20.23
Rajpo14577	serine/threonine-protein phosphatase 2B catalytic subunit alpha isoform-like isoform X1 (A)	28.95	0.03	0.53	0.14	1.99	0.91	0.27	0.11
Rajpo19144	vps35	28.81	14.32	10.4	7.52	58.3	15.32	30.38	16.08
Rajpo11837	kif5c	28.79	0.23	0.3	0.22	12.07	0.05	0.14	0.06
Rajpo16809	cdc42-interacting protein 4 homolog (A)	28.74	1.89	13.28	12.81	91.1	8.02	61.28	8.06
Rajpo08856	rabepk	28.73	11.12	43.7	31.17	73.39	53.44	17.68	60.14
Rajpo02355	ugcg	28.72	10.44	19.35	26.99	26.1	8.79	161.96	12.52
Rajpo19086	lmbrd1	28.71	17.09	26.73	39.46	90.45	51.73	32.45	29.48
Rajpo04934	xrcc5	28.71	16.82	33.58	33	75.92	89.67	52.05	37.6
Rajpo19167	dnajb11	28.69	60.15	13.96	17.34	102	98.69	88.27	10.98
Rajpo04397	supt5h	28.61	10.58	6.69	5.21	42.65	19.96	17.36	14.2
Rajpo00125	aspscr1	28.6	14.45	33.25	30.16	90.68	64.21	28.59	86.45
Rajpo10118	foxk2	28.58	16.34	24.23	16.72	79.73	54.23	35.75	53.75
Rajpo13375	cadherin-related family member 2-like (A)	28.57	0.06	0.02	0.07	0.19	0.88	0	0
Rajpo11192	lgr6	28.55	0.11	0.21	5.53	0.09	1.31	8.02	0.03
Rajpo05475	septin-11-like isoform X1 (A)	28.55	20.66	20.56	55.69	63.72	22.88	267.8	23.54
Rajpo14501	constitutive coactivator of PPAR-gamma-like protein 1 homolog (A)	28.54	11.28	6.23	4.41	14.07	17.15	11.31	10.37
Rajpo01239	cacna2d4a	28.53	0	0.13	0.07	0.48	0	0.04	0.1
Rajpo06374	luc7l	28.52	13.87	27.93	46.68	82.49	28.07	97.97	22.87
Rajpo12775	paraspeckle component 1-like (A)	28.5	10.77	25.05	48.71	52.72	26.84	57.94	9.25
Rajpo12901	tensin-3 isoform X1 (A)	28.5	20.49	3.92	2.1	10.92	112.53	13.72	4.95
Rajpo20787	calcium-binding protein 39-like (A)	28.48	54.17	21.8	66.05	127.88	64.47	114.61	15.29
Rajpo13472	LOW QUALITY PROTEIN: serine/threonine-protein kinase 33-like (A)	28.47	8.83	11.17	10.5	34.26	41.58	7.93	22
Rajpo15008	dkc1	28.47	20.79	34.93	24.07	188.3	49.31	56.2	23.1
Rajpo08196	ing3	28.47	14.98	14.01	17.35	185.9	40.75	53.45	26.29
Rajpo12120	ern2	28.46	9.82	18.52	35.92	10.31	57.64	57.96	27.02
Rajpo09115	lias	28.41	15.27	51.05	55.58	88.27	24.28	85.15	50.95
Rajpo00188	slc4a1ap	28.38	8.41	9.46	3.52	30.39	22.77	8.93	22.53
Rajpo09608	LOW QUALITY PROTEIN: importin-7-like (A)	28.37	16.98	23.47	22.71	122.54	33.83	42.06	40.17
Rajpo15059	nipa2	28.36	16.86	70.08	84.4	154.94	70.83	91.89	89.85
Rajpo05053	klhdc2	28.35	8.91	31.04	35.68	67.67	29.31	34.59	53.64
Rajpo12171	def8	28.2	10.82	5.95	4.88	18.05	9	14.43	4.33
Rajpo18203	psmd10	28.19	12.16	49.45	52.63	136.74	52.12	63.69	116.46
Rajpo19862	uncharacterized protein LOC103177277 (A)	28.19	18.89	11.14	9.37	73.73	17.81	22.94	17.77
Rajpo18813	paraspeckle component 1-like (A)	28.14	14.05	15.72	14.76	44.81	37.5	38.71	9.92
Rajpo16013	zswim8	28.13	15.7	9.46	3.13	26.46	28.04	9.82	7.01
Rajpo01972	LOW QUALITY PROTEIN: hypoxanthine-guanine phosphoribosyltransferase-like (A)	28.11	0	9.26	3.2	3.55	0	0	9.63
Rajpo12579	xrcc6	28.05	25.87	55.29	40.88	88.79	45.09	68.28	33.94
Rajpo20069	cyth1	28.04	12.27	24.74	62.49	20.95	1.91	114.69	17.03
Rajpo19580	lgr4	27.98	24.37	12.92	13.98	29.52	88.6	87.88	7.62
Rajpo14938	pptc7	27.97	26.41	31.81	13.2	14.83	14.45	26	12.52
Rajpo11003	LOW QUALITY PROTEIN: activin receptor type-1-like (A)	27.96	11.48	10.66	14.46	17.91	17.57	30.83	18.24
Rajpo16352	transcription factor 4 (A)	27.94	4.15	22.59	12.76	23.29	2.03	34.29	25.87
Rajpo13494	ribose-phosphate pyrophosphokinase 2 (A)	27.92	19.56	10.45	19.57	45.43	14.56	47.83	11.52
Rajpo17053	PRKAR1B	27.91	3.29	6.15	8.79	23.75	34.09	29.62	12.31
Rajpo10735	zfyve1	27.91	12.38	13.73	16.55	44.66	34.05	22.96	10.22
Rajpo19428	rnf13	27.79	8.69	7.28	6.73	51.04	9.85	23.55	16.13
Rajpo08802	fam219b	27.79	5.22	1.66	3.35	12.24	7.27	8.17	7.66
Rajpo05631	lhfpl6	27.78	42.91	9.51	7.92	6	32.36	7.39	30.91
Rajpo01729	zfand4	27.65	16.76	12.69	8.96	33.03	24.57	17.76	26.43
Rajpo22776	orc2	27.61	24.48	31.52	31.81	94.2	49.49	35.85	68.56
Rajpo06964	cdk8	27.61	8.73	13.01	24.96	125.98	53.37	34.55	6.86
Rajpo21048	guanine nucleotide-binding protein G(i) subunit alpha-3 (A)	27.6	22.46	3.81	1.19	20.8	11.12	18.42	5.4
Rajpo02939	mbtps1	27.55	12.4	12.65	9.69	62.1	23.69	32.23	11.33
Rajpo09314	capns1	27.54	9.33	22.13	15.92	21.23	18.92	247.58	60.37
Rajpo02485	probable palmitoyltransferase ZDHHC8 isoform X1 (A)	27.5	13.92	12.53	6.35	47.4	10.75	14.27	7.98
Rajpo05204	fibroblast growth factor 12-like (A)	27.49	0	6.3	0	33.23	4.63	1.62	0
Rajpo21595	tmem214	27.44	31.19	9.68	13.82	131.88	81.18	43.34	11.73
Rajpo18802	tmem259	27.43	21.08	12.32	15.2	90.41	88.78	28.24	28.5
Rajpo06004	wdr25	27.4	12.16	22.56	18.36	21.86	41.71	11.48	32.9
Rajpo09571	atrial natriuretic peptide receptor 2-like (A)	27.37	1.12	0.31	0.62	9.36	1.21	6.25	1.21
Rajpo22448	dennd6a	27.34	12.58	22.59	22.6	41.14	59.15	47.18	22.63
Rajpo03173	beta-1,4-galactosyltransferase 3-like isoform X1 (A)	27.34	36.89	18.51	12.7	37.36	33.25	14.84	16.71
Rajpo22426	polr2b	27.32	16.84	22.47	30.41	94.14	54.45	53.41	39.38
Rajpo20272	glrb	27.29	0.1	0.24	0.25	0.53	0.28	0.4	0.41
Rajpo00084	dyrk1a	27.24	6.47	6.54	4.69	45.84	10.04	10.8	10.05
Rajpo05009	cdc73	27.23	16.66	15.85	11.43	95.91	72.52	28.31	25.77
Rajpo10736	wdr21	27.21	11.88	57.29	56.51	57.65	56.43	30.84	233.97
Rajpo14344	celf2	27.14	3.76	25.9	11.12	9.39	1.09	7.73	18.32
Rajpo10491	nit2	27.02	300.45	55.12	44.58	65.55	67.16	34.39	45.05
Rajpo00998	stat1	26.99	55.54	6.4	4.39	13.98	7.96	58.25	10.06
Rajpo17235	protein quaking-B isoform X1 (A)	26.98	2.87	3.19	1.94	4.16	7.68	3.56	9.52
Rajpo00959	taok3	26.96	19.06	29.45	46.88	29.78	30.12	98.51	25.36
Rajpo00265	prickle2b	26.96	9.98	5.54	4.6	49.8	5.18	15.38	2.42
Rajpo17584	slc25a40	26.96	58.38	46.08	44.15	232.53	55.8	41.33	47.51
Rajpo19573	alx4	26.88	0	0	0.83	0.42	0	14.24	0.09
Rajpo11125	serine palmitoyltransferase 1 (A)	26.8	15.48	8.92	15.34	33.1	18.3	53.04	17.22
Rajpo18455	ppp2r5a	26.76	6.52	13.26	23.14	16.09	19.4	33.21	7.04
Rajpo08036	wdr35	26.74	1.69	7.54	10.51	72.5	32.9	11.39	4.72
Rajpo05135	small ubiquitin-related modifier 1 isoform X1 (A)	26.7	21.59	37.19	66.37	65.76	22.16	146.68	29.52
Rajpo09652	dner	26.69	0.09	0.59	0.13	5.16	0.25	2.14	0
Rajpo14871	scamp1	26.63	13.84	8.96	9.69	43.11	12.95	21.06	16.56
Rajpo19662	single-stranded DNA-binding protein 2 isoform X1 (A)	26.6	2.04	5.52	4.03	9.6	1.58	6.06	13
Rajpo07110	twf2	26.59	3.74	36.43	12.13	11.24	24.93	4.46	44.84
Rajpo20308	wdr43	26.57	19.85	24.46	23.92	117.05	42.24	36.51	36.65
Rajpo16690	nisch	26.56	7.78	11.44	21.26	22.31	19.91	33.43	14.14
Rajpo11021	pik3c3	26.56	13.95	24.94	28.16	66	34.1	27.71	27.24
Rajpo05215	DNA topoisomerase 1-like (A)	26.56	16.56	43.2	39.8	52.07	17.89	29.49	12.75
Rajpo05658	ptenb	26.54	18	7.43	3.21	49.05	15.2	10.75	13.21
Rajpo12361	actin, non-muscle 6.2 (A)	26.53	15.46	537.4	656.08	55.79	119.67	2362.17	138.37
Rajpo14262	ppm1h	26.47	0.53	1.8	1.58	26.59	4.22	6.4	1.01
Rajpo03585	rassf1	26.47	24.28	7.18	6.13	24.84	6.86	71.84	7.72
Rajpo19638	tmem2	26.42	8.14	9.47	8.28	110.8	29.28	15.13	8.07
Rajpo00658	gnl2	26.41	12.46	37.62	49.87	112.76	37.54	60.4	55.53
Rajpo19131	agl	26.39	22.87	160.59	97.43	19.11	9.1	9.57	89.39
Rajpo03096	htt	26.33	4.15	3.09	2.48	6.91	9.27	5.46	3.52
Rajpo02480	autism susceptibility gene 2 protein-like (A)	26.3	19.14	9.31	6.76	197.25	46.69	12.25	13.81
Rajpo09698	segment polarity protein dishevelled homolog DVL-3 (A)	26.3	24.38	9.98	4.1	28.38	29.21	7.1	10.33
Rajpo16490	LOW QUALITY PROTEIN: calcium/calmodulin-dependent protein kinase type 1-like (A)	26.28	3.25	6.67	1.09	2.29	1.13	2.04	6.07
Rajpo18999	dbt	26.27	13.82	33.17	21.87	46.43	35.56	65.74	24.37
Rajpo21728	map4k3b	26.22	6.89	9.57	7.12	18.98	12.98	17.81	8.75
Rajpo14569	annexin A5-like (A)	26.22	37.04	8.12	9.1	80.6	8.97	54.61	23.07
Rajpo10905	pfdn4	26.21	10.18	88.5	129.96	91.9	36.63	140.08	105.25
Rajpo05804	ddb1	26.15	9.78	11.02	7.86	28.89	11.76	24.34	21.3
Rajpo20372	ppp5c	26.14	5.48	28.94	5.11	23.83	20.19	9.33	19.6
Rajpo09782	lin52	26.13	9.98	13.35	9.23	19.91	13.01	18.17	19.08
Rajpo00175	mthfd1b	26.07	98.01	23.97	14.31	112.13	60.8	22.34	22.68
Rajpo14459	arfip1	26.06	13.79	20.64	28.05	49.6	52.31	72.16	31.2
Rajpo19808	cluha	26.04	54.2	39.62	12.4	92.81	9.37	13.94	19.41
Rajpo05983	mrpl45	25.98	10.02	24.98	13.56	36.13	17.41	27.88	16.73
Rajpo07180	RANBP9	25.92	9.51	7.82	4.62	80.9	24.72	17.17	11.83
Rajpo03179	rab38a	25.92	0	0.73	0.74	0.19	0	0.59	0.18
Rajpo20811	rho guanine nucleotide exchange factor 7 isoform X1 (A)	25.85	11.4	30.82	25.92	99.03	43.96	25.56	29.29
Rajpo13791	api5	25.85	10.27	7.52	11.7	65.96	10.45	61.98	10.17
Rajpo22360	bub3	25.77	16.41	22.32	30.07	84.4	35.66	111.5	19.57
Rajpo00793	bifunctional 3'-phosphoadenosine 5'-phosphosulfate synthase 1 isoform X1 (A)	25.73	13.29	15.39	19.57	30.83	34.34	71.93	7.42
Rajpo05585	ireb2	25.73	33.14	20.9	12.13	97.07	16.8	25.18	19.67
Rajpo08576	receptor-type tyrosine-protein phosphatase kappa-like (A)	25.71	7.67	19.45	41.08	61.15	29.98	50.96	10.89
Rajpo09473	peroxisomal multifunctional enzyme type 2-like (A)	25.7	81.1	5.42	0	111.74	15.88	40.22	12.12
Rajpo08951	epn2	25.68	4.63	5.27	4.32	5.61	3.9	16.71	12.45
Rajpo21784	SNAP25	25.67	1.01	4.73	6.74	11.17	4.13	6.78	1.98
Rajpo22716	tmem39b	25.65	16.68	30.51	40.57	137.91	82.96	41.82	70.62
Rajpo19785	cops5	25.61	8.15	42.01	36.54	53.98	20.5	45.3	39.3
Rajpo15075	tmem131	25.6	17.79	23.62	27.36	169.8	37.35	65.25	38.46
Rajpo08456	cunh18orf21	25.6	3.26	3.21	1.08	30.96	20.1	3.71	4.93
Rajpo10122	tbcd	25.56	6.52	18.89	23.01	44.42	18.22	44.74	31.2
Rajpo18762	ranbp3	25.54	7.99	7.62	6.41	76.74	12.24	21.86	14.6
Rajpo07504	tm9sf2	25.53	30.97	19.28	37.21	56.53	55.96	92.35	29.98
Rajpo02109	U2 snRNP-associated SURP motif-containing protein-like isoform X1 (A)	25.51	16.32	37.99	39.97	58.96	107.36	55.85	35.65
Rajpo06368	flr	25.45	4.49	6.57	10.63	83.59	73.39	16.5	10.14
Rajpo08089	Golgi phosphoprotein 3-like (A)	25.44	32.32	22.52	12.28	22.23	98.58	62.99	30.31
Rajpo12471	baz1b	25.37	9.39	17.94	15.79	38.47	19.04	23.48	12.97
Rajpo14516	hspb7	25.37	0	535.43	86.28	0	0	0.11	1866.95
Rajpo11303	PPP2R5D	25.35	12.08	7.32	2.94	40.34	5.13	10.45	6.3
Rajpo06396	anion exchange protein 2 (A)	25.33	17.77	6.08	2.15	17.15	41.53	8.39	7.19
Rajpo06839	radil	25.3	0.49	0.35	0.08	2.44	5.14	0.09	0.61
Rajpo08729	ppp3cc.L	25.26	7.01	52.31	30.35	18.65	87.05	12.94	16.5
Rajpo19306	dhps	25.23	4.64	38.51	52.84	46.1	32.85	124.26	24.78
Rajpo07106	camkva	25.21	0.04	0.25	0.34	0.21	2.92	0	0
Rajpo07695	transcription factor Dp-2 isoform X1 (A)	25.19	16.29	17.26	13.89	101.22	8.52	39.17	12.86
Rajpo19747	exoc2	25.18	5.87	8.97	12.35	27.79	23.17	32.49	13.79
Rajpo11368	fam49a	25.13	3.9	2.71	0.85	16.71	4.04	1.99	4.21
Rajpo21015	SLC12A5	25.11	0	1.33	0.07	0.11	0	0	0
Rajpo22384	mcmbp	25.09	10.36	14.51	18.53	168.58	39.44	65.38	11.61
Rajpo09128	ruvbl1	25.06	12.11	32.98	49.15	126.03	70.51	67.77	44.75
Rajpo17772	borcs5	25.05	4.09	7.98	6.34	9.88	11.88	4.95	28.54
Rajpo16518	myh9a	25.05	31.3	12.47	13.55	36.29	24.35	100.77	8.97
Rajpo05161	cnot2	25.03	10.61	10.87	13.84	120.71	27.28	64.13	14.62
Rajpo18354	tbce	24.97	2.63	5.75	4.81	20.52	13.07	9	4.01
Rajpo04359	gpc4	24.96	14.9	10.65	12.73	19.47	29.09	54.43	17.27
Rajpo18601	host cell factor 2-like (A)	24.94	7.63	3.63	2.37	9.35	12.51	8.85	9.17
Rajpo06292	nrbp1	24.93	14.64	10.06	10.1	130.31	22.26	43.16	15.24
Rajpo03561	RBFOX1	24.92	0.09	1.84	0.85	6.45	1.36	0.48	4.61
Rajpo15102	zcrb1	24.92	15.21	38.89	42.52	110.52	56.21	42.6	35.37
Rajpo10489	tbc1d23	24.9	10.53	28.68	30.56	34.46	34.19	40.2	34.29
Rajpo13921	PTPRD	24.88	16.05	2.36	1.01	4.89	0.89	1.51	6.06
Rajpo18196	faf1	24.87	9.71	24.83	21.42	80.67	16.81	38.34	59.11
Rajpo14769	agpat5	24.87	31.35	19.16	18.83	54.55	63.43	47.63	24.78
Rajpo19096	tmub2	24.84	17.92	16.02	18.19	78.54	24.21	47.17	26.87
Rajpo00835	stk11	24.84	12.35	13.57	17.13	74.16	12.86	29.19	9.99
Rajpo19750	LOW QUALITY PROTEIN: FH1/FH2 domain-containing protein 3 (A)	24.83	0.33	7.53	3.55	10.41	5.99	0.1	18.94
Rajpo18865	abce1	24.82	11.24	27.89	33.42	86.9	32.03	104.31	22.43
Rajpo19763	afg3l2	24.81	16.1	40.42	27.23	45.64	37.27	31.99	26.8
Rajpo11281	homeobox protein Meis1 isoform X1 (A)	24.8	3.13	3.94	11.78	9.29	0.29	7.9	3.26
Rajpo17757	apeh	24.76	30.7	34.53	34.65	46.5	11.22	33.22	35.65
Rajpo13917	olfm2	24.71	0	0	0	2.03	0	0	0
Rajpo19136	LOW QUALITY PROTEIN: AP-1 complex subunit mu-1-like (A)	24.71	0.12	2.53	2.32	7.4	6.17	4.9	0.59
Rajpo06642	nfic	24.71	31.17	7.41	1.95	9.17	23.05	3.52	16.21
Rajpo04871	WWP1	24.7	7.45	7.35	4.65	10.61	7.77	16.14	11.52
Rajpo13406	cdk7	24.7	10.08	26.64	42.83	110.53	33.79	70.45	17.95
Rajpo22235	TRIM9	24.69	0	1.68	0.28	11.83	0	0.04	0.04
Rajpo06733	ELAV-like protein 1 (A)	24.69	12.07	15.4	20	64.09	9.1	85.61	13.2
Rajpo11318	receptor-type tyrosine-protein phosphatase gamma isoform X1 (A)	24.68	13.99	6.04	3.94	5.43	5.17	8.79	3.3
Rajpo07908	ATP-binding cassette sub-family D member 3 isoform X1 (A)	24.67	14.09	10.78	17.69	42.49	27.45	57.81	9.67
Rajpo01821	nup133	24.61	13.52	20.17	26.22	81.66	43.13	41.66	15.09
Rajpo08701	LOW QUALITY PROTEIN: probable global transcription activator SNF2L1 (A)	24.61	8.79	6.99	9.44	21.03	13.7	21.07	8.5
Rajpo13927	gldc	24.59	36.95	62.12	35.09	11.19	26.1	116.88	33.15
Rajpo02187	cuedc2	24.57	4.61	12.47	8.6	16.28	9.07	13.4	5.08
Rajpo06868	mgat4b	24.55	98.95	24.4	13.4	50.26	11.04	20.51	79.11
Rajpo04558	smarcad1	24.49	13.42	13.85	17.31	95.47	48.79	26.09	25.96
Rajpo10732	srp68	24.48	19.95	26.32	25.67	164.3	121.35	81.7	46.06
Rajpo13625	SAMD11	24.42	1.46	0.81	0.36	7.63	0.38	3.36	1.14
Rajpo03504	aldh1l1	24.41	128.15	28.75	10.85	16.93	28.77	0.81	23.7
Rajpo21363	r3hdm1	24.4	6.48	21.08	12.1	54.06	22.27	10.01	27.34
Rajpo14894	JAZF1	24.37	10.32	7.11	5.19	47.75	9.91	16.96	11.23
Rajpo01318	sh3bp5	24.35	1.26	1.57	0.9	9.46	4.15	5.95	5.53
Rajpo04208	beta,beta-carotene 9',10'-oxygenase-like isoform X1 (A)	24.35	0.68	3.6	4.64	1.52	1.96	0.05	0.51
Rajpo14127	nmnat2	24.32	0	0.12	0	0.86	0.19	0.79	0.12
Rajpo04696	ptpn12	24.27	16.04	11.93	12.55	183.18	15.68	61.21	13.86
Rajpo00489	dnajc17	24.26	13.69	36.7	63.26	171.03	36.24	98.52	64.82
Rajpo22383	sec23ip	24.24	22.86	13.24	10.5	84.24	58.36	25.77	13.12
Rajpo13137	suppressor of tumorigenicity 7 protein homolog isoform X1 (A)	24.21	106.17	30.7	23.24	152.64	98.46	40.6	60.42
Rajpo22645	cul1b	24.17	11.06	25.31	35.39	58.79	25.36	42.34	25.55
Rajpo20688	prpf40a	24.16	11.86	11.95	20.32	94.51	20.65	49	32.83
Rajpo01154	ilrun	24.16	11.78	40.49	35.57	60.31	19.52	35.85	59.46
Rajpo21100	fam91a1	24.1	17.11	4.05	2.44	30.36	17.77	12.14	5.29
Rajpo14248	slc38a4	24.09	119.33	27.12	10.34	0.27	0.09	0.08	46.12
Rajpo16781	retreg1	24.04	11.38	49.47	12.05	27.13	11.49	4.74	28.75
Rajpo05321	casein kinase I (A)	24.04	7.62	3.56	2.98	6.72	8.22	10.9	8.69
Rajpo02519	taf9	24.04	14.87	27.27	37.76	122.04	64.75	88.89	38.03
Rajpo11998	MYH10	24.02	12.4	9.16	4.38	22.19	21.98	8.15	20.41
Rajpo04829	cyclin-dependent kinase 11B-like isoform X1 (A)	23.95	11.54	27.72	35.93	75.35	30.2	47.81	48.8
Rajpo20933	appl2	23.95	4.06	11.41	11.53	37.6	46.17	43.08	28.17
Rajpo07029	GARNL3	23.94	4.14	4.87	1.09	10.25	9.71	0.28	0.06
Rajpo10821	gnas	23.93	10.72	15.96	19.97	75.01	21.53	64.66	18.87
Rajpo16272	otud6b	23.87	16.41	40.04	46.73	106.36	113.46	39.19	65.36
Rajpo18964	kinesin-1 heavy chain isoform X1 (A)	23.86	7.15	10.9	13.57	17.03	5.28	74.48	9.64
Rajpo21526	glb1	23.83	160.48	40.54	101.42	158.91	212.66	113.34	18.82
Rajpo16385	arf-GAP domain and FG repeat-containing protein 1-like (A)	23.83	44.34	26.9	12.74	53.19	65.97	39.27	78.76
Rajpo01377	usta	23.82	6.55	11.31	15.88	24.13	19.82	31.1	13.59
Rajpo02747	pyruvate carboxylase, mitochondrial-like (A)	23.77	35.61	5.74	2.66	19.16	9.79	8.88	5.43
Rajpo19011	nek7	23.77	8.64	29.37	34.97	81.26	21.68	50.6	21.03
Rajpo01592	LOW QUALITY PROTEIN: ATP-dependent RNA helicase DHX8-like (A)	23.75	5.58	7.29	6.03	23.62	11.17	17.55	14.99
Rajpo21616	PIK3R3	23.74	18.64	14.02	8.13	115.46	8.61	7.3	12.84
Rajpo03657	tatdn1	23.73	5.59	15.06	20.43	29.7	21.88	17.47	7.26
Rajpo16112	TBC1 domain family member 22B isoform X1 (A)	23.73	1.18	5.61	7.13	14.47	22.13	20.84	3.21
Rajpo11738	atp13a1	23.69	13.54	21.92	18.78	64.6	85.76	34.21	30.76
Rajpo14803	SRF	23.68	22.9	44.73	20.44	42.84	19.46	14.83	38.89
Rajpo10795	pip5k1b	23.66	0.52	5.3	10.1	94.65	4.23	11.46	0.6
Rajpo12156	sh3rf1	23.63	3.31	6.25	3.73	32.08	7.32	8.15	5.74
Rajpo00398	cytoplasmic polyadenylation element-binding protein 2-like isoform X1 (A)	23.62	8.61	12.79	8.61	4.62	18.38	5.1	11.03
Rajpo07619	tbpl1	23.61	9.54	8.07	13.68	37.76	24.99	34.92	5.91
Rajpo14591	mothers against decapentaplegic homolog 2 isoform X1 (A)	23.56	7.22	4.31	3.69	75.08	12.52	9.62	7.4
Rajpo16447	rab3c	23.55	0.31	0	0.7	10.85	0	0.31	0
Rajpo17057	get4	23.54	15.7	31.06	40.03	75.64	41.35	60.27	74.94
Rajpo06320	CFDP1	23.51	6.4	18.07	27.29	38.09	26.18	37.98	24.08
Rajpo01571	catenin alpha-2-like (A)	23.48	0.19	2.06	0.83	1.4	2.18	0	1
Rajpo12316	coro2b	23.47	0.5	3.57	2.21	15.23	23.68	4.12	1.04
Rajpo18438	PROX1	23.39	26.69	0.98	0.43	16.12	5.45	1.47	0.6
Rajpo06441	protein FAM214B (A)	23.39	1.48	3.21	8.42	59.35	5.85	11.89	3.31
Rajpo18732	acad8	23.38	11.48	102.86	52.49	37.44	26.49	23	111.81
Rajpo10321	tigger transposable element-derived protein 1-like (A)	23.35	16.54	37.88	31.89	174.21	78.85	25.87	71.76
Rajpo00294	bone morphogenetic protein receptor type-2-like (A)	23.35	30.64	3.49	1.03	18.52	23.93	5.06	6.33
Rajpo11414	ska2	23.34	10.32	9.67	15.06	101.75	13.19	32.72	12.05
Rajpo20006	5'-AMP-activated protein kinase subunit gamma-1 isoform X1 (A)	23.28	2.79	8.43	7.23	21.66	8.57	21.19	5.7
Rajpo10812	LOW QUALITY PROTEIN: protein TMEPAI-like (A)	23.25	6.77	8.31	3.4	63.99	52.45	23.69	19.24
Rajpo04245	LOW QUALITY PROTEIN: protein kinase C and casein kinase substrate in neurons protein 1-like (A)	23.22	1.39	0.47	0.53	5.46	0.55	1.24	0
Rajpo19104	spop	23.16	12.05	15.89	8.86	27.85	17.33	21.59	19.58
Rajpo18226	CPSF1	23.13	12.82	19.65	14.98	53.04	22.66	26.32	13.23
Rajpo11129	chondroitin sulfate synthase 3 (A)	23.13	2.11	2.53	5.64	15.29	2.38	6.56	4.38
Rajpo04903	rabep1	23.12	7.61	6.35	5.27	58.88	15.61	10.75	9.65
Rajpo09226	rnf145	23.12	27.19	14.8	21.32	47.87	16.04	26.39	28.94
Rajpo20091	LOW QUALITY PROTEIN: brain-specific angiogenesis inhibitor 1-associated protein 2 (A)	23.07	41.33	7.76	22.16	163.27	16.43	132.13	4.13
Rajpo22630	metrn	22.98	23.52	10	2.09	1.93	0.86	3.89	6.1
Rajpo16369	CTD nuclear envelope phosphatase 1-like (A)	22.96	14.83	115.41	77.41	47.54	15.31	21.1	87.48
Rajpo14423	ckap5	22.94	3.86	11.52	6.7	71.6	12.46	9.86	12.75
Rajpo19798	disco-interacting protein 2 homolog A isoform X1 (A)	22.92	4.92	5.97	5.75	23.62	6.77	16.47	6.55
Rajpo12169	dbndd1	22.92	142.15	8.17	1.72	33.05	39.73	11.07	6.75
Rajpo20974	ras-related protein Rab-3A (A)	22.91	0.19	0	0	0	0	0	0
Rajpo06357	flii	22.89	10.56	18.44	20.56	43.4	18.89	52.79	21.26
Rajpo18992	dph5	22.87	7.06	18.05	23.56	31.27	40.6	25.18	13.8
Rajpo10612	sorcs2	22.86	0.24	0.62	0.37	0.21	0.21	1.19	1.23
Rajpo04444	ehmt1	22.86	6.93	6.77	7.11	50.92	15.12	18.4	7.46
Rajpo03558	abat	22.85	75.18	12.45	12.24	5.46	21.8	10.25	36.82
Rajpo20424	cep43	22.84	8.09	17.94	18.15	53.83	42.76	34.1	20.16
Rajpo22468	aspg	22.83	5.39	4.62	2.27	14.12	7.06	9.93	5.89
Rajpo12826	NOC2L	22.81	13.01	36.35	26.69	121.64	18.55	38.35	82.29
Rajpo06094	sgcd	22.78	0.71	142.14	108.49	6.76	18.13	22.06	316.14
Rajpo08813	PDZ and LIM domain protein 4-like (A)	22.76	1.22	7.54	7.61	30.27	3.37	144.96	19.01
Rajpo14390	KAT8 regulatory NSL complex subunit 1-like (A)	22.74	7.28	5.52	5.96	95.61	27.71	12.1	10.56
Rajpo08218	msrb3	22.74	7.7	75.93	78.56	35.81	19.46	45.31	51.6
Rajpo21241	phf10	22.68	15.15	18.06	27.23	85.47	20.03	55.49	10.18
Rajpo18699	LOW QUALITY PROTEIN: pleckstrin homology domain-containing family A member 5-like (A)	22.66	18.63	8.93	9.88	38.25	32.25	29.65	4.45
Rajpo13451	trim36	22.65	0	6.67	6.15	0.8	1.08	1.17	4.47
Rajpo16030	2-oxoglutarate dehydrogenase-like, mitochondrial isoform X1 (A)	22.63	9.25	2.41	4.94	9.3	9.97	31.65	5.58
Rajpo13388	pdlim3	22.63	2.03	126.7	67.58	2.09	1.13	3.33	1997.47
Rajpo12394	phosphorylase b kinase gamma catalytic chain, skeletal muscle/heart isoform-like (A)	22.61	4.66	71.58	45.65	10.97	17.74	4.46	69.47
Rajpo01285	potassium/sodium hyperpolarization-activated cyclic nucleotide-gated channel 1 (A)	22.59	0.02	0.37	0.1	1.14	0.57	0.06	0.03
Rajpo05345	vps53	22.58	12.53	8.19	3.91	34.05	32.75	6.87	21.4
Rajpo22381	wdr11	22.55	16.61	2.6	3.69	44.11	10.77	14.25	5.01
Rajpo02508	aifm1	22.54	19.96	31.88	19.29	53.83	24	36.42	11.64
Rajpo04831	mib2	22.54	15.59	10.12	7.24	15.98	4.51	4.81	10.92
Rajpo07760	pinx1	22.53	62.03	87.26	109.26	238.54	118.28	82.3	144.44
Rajpo18192	rnf11	22.53	8.92	4.69	4.05	57	17.61	8.11	5.12
Rajpo12784	fbxo10	22.53	12.82	6.03	5.13	27.17	53.13	8.03	15.99
Rajpo06395	ATG9B	22.51	17.34	23.76	11.4	37.63	23.49	8.8	74.8
Rajpo02627	uba6	22.5	12.62	19.74	25	54.36	39.75	35.49	31.57
Rajpo20486	ube4b	22.5	8.66	11.91	7.65	120.35	84.67	19.29	13.98
Rajpo03194	zmat5	22.49	12.94	14.45	14.39	136.29	68.59	34.06	37.14
Rajpo09759	kiaa1429	22.46	7.09	18.61	25.81	40.53	17.98	36.07	6.67
Rajpo19004	UDP-N-acetylglucosamine transporter (A)	22.43	11.31	16.3	26.51	16.56	32.14	85.05	8.76
Rajpo10108	PRKAA1	22.35	9.86	6.8	3.75	12.14	9.78	18.62	10.21
Rajpo02151	gap43	22.22	0	0.16	0.64	4.79	0.24	0.07	0
Rajpo03669	yes1	22.22	13.01	3.25	5.52	9.06	7.36	30.93	5.02
Rajpo20691	GALNT13	22.21	6.16	0.34	0.28	4.2	0.09	0.03	0.49
Rajpo12176	spg7	22.18	18.37	22.35	12.68	32.04	35.54	23.56	17.27
Rajpo00871	nfs1	22.17	12.93	10.96	9.55	32.53	12.45	23.93	18.96
Rajpo18991	dph5	22.15	5.98	16.98	9.99	19.79	17.21	18.05	10.39
Rajpo03378	dync1li1	22.12	1.31	16.86	15.39	58.74	62.53	16.12	38.41
Rajpo12280	ctu2	22.1	6.24	14.9	23.97	77.45	17.32	36.66	7.56
Rajpo12328	aagab	22.08	5.2	15.84	13.87	79.15	24.8	25.74	11.72
Rajpo05544	sema3c	22.05	1.05	27.5	18.78	14.92	0.55	14.33	61.02
Rajpo20174	ccdc25	22.04	14.07	63.77	105.38	314.32	103.76	170.21	60.89
Rajpo15216	dipeptidyl aminopeptidase-like protein 6 isoform X1 (A)	22.03	0.7	0	0.05	10.79	2.02	0	0.11
Rajpo06382	LOW QUALITY PROTEIN: E3 ubiquitin-protein ligase MGRN1-like (A)	21.99	14.54	4.92	2.6	12.64	17.05	17.72	10.17
Rajpo00735	kpna2	21.98	9.84	15.73	11.37	784.11	9.29	55.18	7.51
Rajpo02342	atf2	21.96	14.25	13.37	13.07	51.3	33.94	30.75	30.62
Rajpo03949	lrrc40	21.95	11.24	10.28	18.01	34.05	77.77	49.81	22.69
Rajpo20507	fbxl2	21.93	5.31	10.26	20.69	36.32	29.42	18.33	10.66
Rajpo11576	alg5	21.93	27.09	36.56	60.73	58.9	147.67	149.25	48.93
Rajpo06059	trappc8	21.87	22.73	9.27	5.72	30.68	17.71	16.81	11.77
Rajpo01595	nbr1	21.87	12.96	6.5	4.19	46.15	23.05	15.68	11.09
Rajpo19599	tmem65	21.86	4.02	8.87	6.79	5.73	2.81	15.15	8.28
Rajpo19966	CCDC102A	21.86	7.44	12.02	19.66	43.53	16.25	25.97	16.02
Rajpo17734	regulation of nuclear pre-mRNA domain-containing protein 2-like (A)	21.83	9.39	4.7	1.8	27	15.58	4.93	6.6
Rajpo20171	slc35f6	21.83	8.88	4.6	6.56	213.52	22.72	26.36	6.07
Rajpo14753	LOW QUALITY PROTEIN: pyrroline-5-carboxylate reductase 3-like (A)	21.78	12.6	15.53	15.4	30.09	29.76	8.18	29.12
Rajpo02834	LOW QUALITY PROTEIN: uncharacterized protein KIAA0232-like (A)	21.75	2.16	13.14	8.55	2.41	3.86	9.58	9.91
Rajpo14311	slco3a1	21.75	0	0.04	0	4.48	0.41	0	0
Rajpo09204	hps5	21.74	11.61	16.24	25.42	53.66	27.28	40.2	12.03
Rajpo20282	rapgef2b	21.71	3.27	4.42	2.39	22.68	7.08	3.53	4.39
Rajpo14957	poly(A) polymerase gamma isoform X1 (A)	21.71	9.45	14.24	29.35	47.7	37.6	61.59	15.49
Rajpo00122	pyrroline-5-carboxylate reductase 1, mitochondrial-like (A)	21.7	44.71	20.95	27.78	274.34	49.18	81.4	19.33
Rajpo11404	rpa1	21.66	11.91	15.83	22.29	98.86	32.76	47.42	16.55
Rajpo03221	zinc finger protein 385D isoform X1 (A)	21.62	0	11.08	12.32	3.6	0.49	1.55	3.66
Rajpo17217	pre-mRNA-splicing factor 38A-like (A)	21.59	12.01	12.37	27.1	137.86	34.65	70.67	30.13
Rajpo18444	rps6kc1	21.57	3.27	7.06	5.17	35.34	11.93	12.45	6.09
Rajpo20930	LOW QUALITY PROTEIN: mitochondrial 10-formyltetrahydrofolate dehydrogenase-like (A)	21.56	223.5	23.57	13.21	7.53	30.94	10.82	31.97
Rajpo06995	ribosomal protein S6 kinase alpha-6 isoform X1 (A)	21.55	8.38	16.79	22.72	74.86	34.66	37.09	20.78
Rajpo01732	rnf111	21.55	8.05	8.93	5.51	81.87	21.16	10.76	12.66
Rajpo09484	snx24	21.54	13.74	6.26	8.08	6.67	16.61	22.39	14.34
Rajpo01241	dcp1b	21.53	6.67	11.37	17.64	76.89	31.98	22.03	20.63
Rajpo19864	FGFRL1	21.52	15.31	23.48	5.8	1.86	52.96	0.23	13.48
Rajpo11645	retinoic acid receptor RXR-alpha-A-like isoform X1 (A)	21.51	41.2	8.59	3.87	20.46	12	11.73	14.36
Rajpo04287	kansl1b	21.51	7.51	3.17	2	14.87	10.06	8.36	7.3
Rajpo06344	edil3b	21.51	0.57	2.06	0.49	4.04	0.31	0.46	3.39
Rajpo18547	hydroxyacylglutathione hydrolase, mitochondrial-like isoform X1 (A)	21.51	32.73	26.23	15.3	43.41	25.8	16.26	24.03
Rajpo21614	pomgnt1	21.5	8.51	7.61	7.59	20.07	17.88	15.84	15.43
Rajpo17599	man2c1	21.47	10.04	11.63	8.34	51.77	42.27	17.29	18.17
Rajpo14927	brap	21.45	7.15	6.21	6.96	27.29	24.88	17.95	15.17
Rajpo09589	LOW QUALITY PROTEIN: MOB kinase activator 2-like (A)	21.45	87.43	9.18	9.05	36.04	26.13	23.63	10.26
Rajpo15977	AP-3 complex subunit mu-1 (A)	21.44	25.94	20.91	31.86	62.92	74.83	80.85	23.75
Rajpo22310	tbrg4	21.43	13.07	35.43	31.44	86.49	28.7	57.98	41.12
Rajpo19408	RAB12	21.42	4.05	37.25	24.04	11.78	5.65	13.62	54.68
Rajpo13584	ide	21.4	9.43	8.98	3.93	26.17	9.6	13.26	10.13
Rajpo05603	general transcription factor IIH subunit 4 (A)	21.37	14.97	8.26	4.32	27.26	27.59	14.65	10.69
Rajpo20658	tcea2	21.37	1.97	1.89	3.33	13.91	15.11	3.39	2.39
Rajpo05160	kcnmb4	21.34	0	0.55	0	6.1	0	0	0
Rajpo14439	cdkal1	21.32	12.37	44.99	45.73	59.14	42.18	76.82	49.2
Rajpo07793	lap3	21.31	11.31	49.44	36.29	59.59	30.37	43.13	30.57
Rajpo19829	LOW QUALITY PROTEIN: protein AMN1 homolog (A)	21.29	5.6	17.02	25.14	163.73	45.67	39.8	26.82
Rajpo15239	ttc8	21.28	1.64	10.35	8.64	7.22	22.71	5.33	22.14
Rajpo16986	camk1da	21.28	0.25	0.19	0	2.57	1.18	0.27	0.27
Rajpo21506	cytoplasmic dynein 2 heavy chain 1 (A)	21.26	1.49	2.7	5.06	16.41	17.82	7.83	1.82
Rajpo16186	RAB4B	21.26	59.31	5.57	1.86	13.79	22.47	5.21	5.62
Rajpo11889	activating molecule in BECN1-regulated autophagy protein 1 isoform X1 (A)	21.25	10.81	13.49	12.71	95.99	19.14	19	8.8
Rajpo04965	gmps	21.24	19.89	5.66	10.02	45.4	21.33	49.33	10.16
Rajpo21168	trappc11	21.24	9.49	8.05	9.94	79.63	24.92	21.88	7.52
Rajpo05715	mtmr1b	21.22	9.26	10.31	5.49	9.21	20.48	22.28	15.09
Rajpo10163	uridine-cytidine kinase 2-A-like isoform X1 (A)	21.2	17.07	10.43	5.29	107.34	8.84	12.09	13.24
Rajpo05907	gnaz	21.19	0.05	0.19	0.39	4.1	0	0	0
Rajpo21642	nt5dc1	21.18	4.77	5.86	7.37	3.64	4	15.65	8.12
Rajpo03014	cpsf7	21.17	7.67	6.3	5.17	67.28	13.65	19.66	21.45
Rajpo14310	synaptic vesicle glycoprotein 2B-like (A)	21.17	0.03	0	0.1	0	0	0	0
Rajpo06483	si:ch211-207d6.2	21.15	10.79	13.39	11.38	8.73	27.85	29.33	27.65
Rajpo18997	cdc14ab	21.15	9.58	5.25	4.39	20.68	41.9	9.97	7.32
Rajpo00335	WD repeat-containing protein 48 (A)	21.13	6.79	5.44	7.51	28.77	24.02	18.89	11.19
Rajpo10257	sema3e	21.12	0.06	0.39	0.06	7.77	0.32	0.67	0.13
Rajpo17166	syn2	21.11	0.03	0.66	0.54	5.03	0	0.38	0.48
Rajpo04787	LOW QUALITY PROTEIN: F-actin-uncapping protein LRRC16A (A)	21.09	9.76	1.44	1	2.76	41.52	5.17	0.68
Rajpo02351	hsdl2	21.06	71.8	22.47	20.97	50.61	43.64	37.65	19.32
Rajpo04463	SLC23A2	21.03	24.02	1.31	0.28	31.03	2.85	1.61	1.12
Rajpo10507	iars2	20.99	14.38	13.36	14.18	41.02	29.01	29.27	22.43
Rajpo13733	BCL-6 corepressor-like (A)	20.96	13.94	7.22	8.14	22.1	13.17	10.15	6.29
Rajpo12742	mitochondrial basic amino acids transporter (A)	20.92	11.93	53.82	43.28	33.96	18.38	17.15	11.5
Rajpo06978	NLGN4X	20.88	0.55	0.71	0.12	0.14	0.33	0.18	0.17
Rajpo05681	eri1	20.87	11.05	19.26	20.25	91.26	16.28	32.45	13.45
Rajpo04506	sirt7	20.84	2.96	6.34	2.85	24.59	2.49	4.75	4.3
Rajpo11016	EH domain-containing protein 3 (A)	20.83	5.65	2	3.52	49.1	0.73	10.67	6.22
Rajpo08284	sec22a	20.8	6.68	7.36	4.41	28.49	59.76	6.96	26.36
Rajpo16380	golph3	20.77	13.38	6.69	4.28	30.73	16.85	13.53	9.74
Rajpo13423	RNA binding protein fox-1 homolog 2-like isoform X1 (A)	20.76	7.78	63.15	37.59	15.11	11.06	30.74	88.34
Rajpo03468	stam	20.72	9.76	6.8	3.95	12.25	20.95	0.73	12.09
Rajpo11680	commd10	20.71	12.27	17.04	16.8	67.99	23.59	20.59	22.18
Rajpo18605	chst11	20.69	0.88	0.1	0.08	6.64	2.26	0.32	8.12
Rajpo06083	lancl1	20.69	12.72	24.77	21.89	59.35	43.94	26.38	48.31
Rajpo20728	bahd1	20.56	13.94	4.79	2.97	29.4	18.64	7.4	3.69
Rajpo17821	rufy1	20.56	12.84	19.37	38.18	71.77	72.37	63.82	30.73
Rajpo19970	LOW QUALITY PROTEIN: zinc finger CCCH domain-containing protein 18-like (A)	20.56	8.92	12.43	7.48	56.9	17.71	16.73	27.06
Rajpo18362	ero1b	20.53	63.02	12.59	14.02	50.08	149.08	41.41	10.44
Rajpo18341	fam219a	20.52	5.63	2.22	1.44	25.11	2.78	8.51	5.36
Rajpo17350	lrsam1	20.5	7.48	12.9	8.55	42.33	26.02	13.62	28.16
Rajpo05991	wdr91	20.47	12.66	7.53	7.7	42.21	13.36	20.91	5.42
Rajpo16595	ppil4	20.45	13.84	14.28	20.49	64.82	36.13	58.58	20.23
Rajpo17955	scfd1	20.44	17.46	14.02	25.36	37.75	52.44	68.77	9.25
Rajpo19530	pip4k2b	20.41	19.37	5.6	4.07	85.74	10.03	28.77	13.37
Rajpo05251	sodium/potassium-transporting ATPase subunit beta-1-interacting protein 3-like isoform X1 (A)	20.37	3.41	5.03	0.91	74.41	1.46	1.31	2.34
Rajpo21583	dfna5	20.34	1.85	7.16	7.95	24.7	1.62	16.97	13.48
Rajpo07758	mtmr9	20.27	6.16	4.97	4.78	20.8	16.34	21.47	5.71
Rajpo12351	ankrd29	20.27	11.83	16.03	13.21	72.03	2.35	21.43	3.47
Rajpo07403	senp7	20.26	9.45	14.29	20.05	59.77	36.79	25.79	12.57
Rajpo07726	LOW QUALITY PROTEIN: death-inducer obliterator 1-like (A)	20.19	9.17	7.25	4.68	65.07	23.01	11.77	9.54
Rajpo12969	kif21a	20.19	5.37	9.21	14.69	22.35	12.32	15.76	10.69
Rajpo10668	ppp1r7	20.17	8.53	21.36	32.26	82.33	44.05	51.06	51.19
Rajpo01661	S-methyl-5'-thioadenosine phosphorylase (A)	20.14	26.88	50.99	83.18	68.98	41.42	147.52	43.25
Rajpo08040	lsm4	20.14	6.68	31.3	35.74	123.19	11.91	65.59	47.06
Rajpo16344	epc1a	20.07	16.1	5.53	10.33	86.65	22.06	19.19	9.45
Rajpo12864	nt5e	20.07	0.43	0.81	0.22	3.64	1213.11	2.21	2.49
Rajpo04919	mybbp1a	20.04	6.89	11.18	8.47	45.7	21.45	19.69	21.19
Rajpo18804	mfsd14a2	19.98	7.22	5.78	5.04	13.17	2.5	26.59	4.04
Rajpo15535	LOW QUALITY PROTEIN: lysine-specific demethylase 3B-like (A)	19.97	8.25	8.21	3.36	30.36	9.57	6.18	10.5
Rajpo06780	nfia	19.94	12.87	5.92	3.08	3.09	13.25	5.77	11.23
Rajpo15676	bbs2	19.87	5.32	3.3	1.84	16.69	40.65	3.65	3.46
Rajpo20731	dnal1	19.87	1.17	2.36	3.05	39.19	3.39	13.62	2.85
Rajpo11384	acad9	19.86	61.61	23.28	25.04	65.79	33.84	38.18	30.68
Rajpo15735	dhrs12	19.8	28.77	32.93	54.96	43.93	244.84	88.19	3.92
Rajpo05474	E3 ubiquitin-protein ligase SH3RF3 (A)	19.78	0.63	2.3	2.25	7	0.63	3.18	2.56
Rajpo10272	nubp2	19.76	15.72	20.27	25.55	62.03	18.12	74.48	14.37
Rajpo03237	alpha-1,6-mannosylglycoprotein 6-beta-N-acetylglucosaminyltransferase A-like (A)	19.74	3.7	12.59	15.82	18.56	18.68	18.03	13.22
Rajpo16925	BBS5	19.72	1.76	486.81	161.56	15.9	48.3	9.13	301.23
Rajpo00521	KDM1A	19.7	7.9	3.75	3.27	42.6	70.63	12.55	3.95
Rajpo17591	DLGAP4	19.68	2.21	3.41	4.17	9.43	5.45	12.11	2.29
Rajpo19787	arfgef1	19.58	4.54	7.39	14.57	20.62	22.66	21.31	8.86
Rajpo12325	map2k5	19.57	16.76	13.98	17.5	19.81	16.47	25.66	12.61
Rajpo17170	atg7	19.57	11.99	16.57	12.28	52.9	24.99	42.38	10.41
Rajpo12494	probable E3 ubiquitin-protein ligase DTX2 isoform X1 (A)	19.47	6.69	9.42	13.05	27.87	18.14	22.43	10.79
Rajpo14611	letm1	19.47	9	10.77	8.15	48.83	15.41	28.15	10.28
Rajpo00512	rad1	19.46	11.38	6.65	4.93	18.28	17.58	12.37	8.11
Rajpo15054	slc9a7	19.45	11.06	5.06	1.63	12.75	3.06	2.75	3.47
Rajpo16448	GNAI2	19.43	5.18	2.07	2.1	15.55	1.63	18.27	3.5
Rajpo11614	arnt2	19.43	4.51	3.9	0.69	11.03	2.78	4.23	9.23
Rajpo15357	protein NPAT isoform X1 (A)	19.41	9.64	9.21	12.74	78.08	27.88	22.4	8.74
Rajpo22669	rgs20	19.4	0	0	0	0.09	0	0	0
Rajpo16839	tdrd3	19.35	16.81	24.45	26.64	105.36	55.46	31.66	24.53
Rajpo14508	ptpdc1	19.34	5.3	4.7	3.22	11.69	22.55	2.36	19.96
Rajpo11577	dnajc3a	19.33	81.69	15.09	21.54	102.47	178.32	73.84	16.99
Rajpo02748	pyruvate carboxylase, mitochondrial (A)	19.32	32.06	5.82	3.52	16.55	8.57	4.33	3.79
Rajpo11126	cdc42se2	19.31	3.5	0	7.79	8.04	0	11.21	7.96
Rajpo04703	usp19	19.29	7.82	20.26	10.13	40.95	12.01	6.34	29.77
Rajpo12626	hibch	19.28	10.22	43.41	40.73	67.26	23.07	51.1	23.89
Rajpo17699	ELAVL4	19.24	0	0	0	0.04	0	0	0
Rajpo02171	cwc27	19.24	15.8	29.39	48.23	104.48	69.61	54.05	27.62
Rajpo20014	ndufaf6	19.24	14.41	86.73	91.16	95.45	42.63	54.33	69.83
Rajpo18374	UBR7, C14orf130, LICAS	19.24	6.33	3.59	2.07	62.87	108.51	9.55	5.81
Rajpo03753	RNF123	19.23	6.57	60.46	34.85	30.46	30.41	5.23	46.93
Rajpo07617	eya4	19.23	0.19	18.09	14.92	1.94	3.05	0.17	32.99
Rajpo10673	AMMECR1-like protein (A)	19.19	14.99	19.04	13.08	75.49	38.28	19.8	9.78
Rajpo12180	ppp1r1c	19.18	185.74	1.46	0.71	0.52	39.53	4.29	4.08
Rajpo04697	rsbn1l	19.18	12.4	30.01	26.07	76.98	15.15	24.95	13.2
Rajpo11903	receptor-type tyrosine-protein phosphatase alpha isoform X1 (A)	19.17	4.2	7.69	7.94	10.65	10.29	19.61	9.55
Rajpo21120	gabra2a	19.13	0	0.07	0	2.11	0	0.03	0
Rajpo22615	STE20-related kinase adapter protein alpha-like (A)	19.12	6.79	22.33	18.03	22.57	16.55	20.71	39.78
Rajpo22082	nup160	19.1	7.8	12.93	9.66	78.99	20.87	44.5	11.66
Rajpo16068	ascc1	19.09	8.88	8.73	6.05	67.34	30.82	12.32	26.24
Rajpo17937	RABGAP1L	19.06	13.88	9.03	4.36	11.58	8.32	9.25	14.19
Rajpo09051	dpm1	19.03	10.11	15.97	27.45	33.41	38.49	76.8	15.8
Rajpo10247	scap	19.02	26.03	5.33	2.91	22.54	11.33	8.43	10.16
Rajpo06304	fam76b	19.01	4.15	3.51	5.92	6.92	14.29	27.51	8.46
Rajpo13407	serinc5	18.96	11.91	2.7	0.99	5.69	4.28	6.6	5.38
Rajpo09756	LIM domain-binding protein 1-like isoform X3 (A)	18.96	15.85	6.8	4.47	27.74	17.91	26.57	8.7
Rajpo16662	oxysterol-binding protein-related protein 5-like isoform X1 (A)	18.93	1.76	4.55	4.48	42.46	54.07	11.56	8.28
Rajpo17105	NIPA-like protein 3 (A)	18.92	5.31	24.3	16.03	125.4	38	32.61	20.45
Rajpo19309	fbxw9	18.89	4.01	8.25	7.38	7.95	9.82	9.52	9.65
Rajpo14412	CLPB	18.89	15.58	10.98	4.75	18.07	16.71	7.2	5.78
Rajpo00262	magi1b	18.87	11.53	8.44	4.04	9.5	14.79	6.58	4.29
Rajpo16663	CARS	18.86	12.85	27.54	39.74	70.42	166.28	98.45	22.89
Rajpo04841	ephrin type-B receptor 2 isoform X1 (A)	18.82	0	0.67	3.83	3.72	0.23	5.28	0.35
Rajpo18860	ints1	18.8	2.15	2.3	1.4	16.85	4.23	3.79	2.67
Rajpo19572	protein ENL (A)	18.77	4.76	17.23	15.83	106.74	31.34	20.12	35.48
Rajpo18700	aebp2	18.75	3.37	6.57	6.45	17.7	7.38	17.56	8.18
Rajpo15558	ddc	18.74	13.8	6.46	6.39	1.29	0	0.84	4.42
Rajpo12873	rab proteins geranylgeranyltransferase component A 1-like (A)	18.74	7.15	14.63	20.54	90.54	48.21	40.48	44.7
Rajpo12946	btbd8	18.73	0.54	1.44	1.89	28.35	2.47	1.16	2.44
Rajpo11154	utp25	18.68	7.72	12.8	13.91	77.34	14.67	24.98	20
Rajpo16388	CHD3	18.64	8.2	9.34	4.59	30.93	12.62	6.03	11.63
Rajpo10589	LOW QUALITY PROTEIN: cullin-4B-like (A)	18.64	6.11	17.94	19.25	56.84	19.88	19.79	15.09
Rajpo21052	transmembrane protein 39A (A)	18.61	16.53	14.18	20.1	84.81	69.36	49.44	13.2
Rajpo12437	LON peptidase N-terminal domain and RING finger protein 3-like (A)	18.61	3.72	2.42	2.35	6.56	39.09	1.88	7.28
Rajpo02947	ST7	18.61	6.29	69.39	42.43	55.26	174.01	27.34	102
Rajpo08603	hsf2	18.58	10.71	4.75	8.2	220.04	18.12	15.56	7.43
Rajpo01226	fbln1	18.57	2.13	3.09	0.87	1.08	3.56	25.08	47.48
Rajpo04354	hprt1	18.53	12.47	36.68	63.66	78.31	22.83	51.73	25
Rajpo05479	ccdc93	18.51	18.06	27.65	35.7	83.89	40.84	28.46	56.01
Rajpo07310	rbbp7	18.48	6.25	10.85	9.99	32.1	18.66	54.87	7.69
Rajpo13345	wrnip1	18.46	4.56	4.25	3.31	26.84	8.67	3.62	6.15
Rajpo01686	farp1	18.46	11.41	4.3	1.87	19.29	6.5	11.78	10.92
Rajpo15063	herc2	18.45	4.75	2.23	1.22	5.71	5.75	1.9	3.13
Rajpo21197	ano10a	18.42	23.28	50.87	44.88	150.13	28.85	41.2	170.84
Rajpo16339	cul2	18.42	9.69	40.08	35	39.88	18.2	33.04	50.35
Rajpo02294	sorting nexin-19-like isoform X1 (A)	18.41	4.25	4.94	3.78	21.95	23.83	6.54	5.81
Rajpo10119	wdr45b	18.4	15.78	12.54	18.84	57.03	20.22	53.64	12.92
Rajpo20649	LOW QUALITY PROTEIN: nucleolar protein 4-like (A)	18.39	0.46	1.37	0.39	6.72	10.57	0.4	1.07
Rajpo00324	ras-related protein Rab-5B-like (A)	18.36	9.91	6.58	5.52	22.47	7.9	13.92	11.84
Rajpo12241	igf2r	18.35	9.3	7.4	4.88	56.79	42.98	11.73	9.48
Rajpo19856	LOW QUALITY PROTEIN: ATP-dependent DNA helicase DDX11-like (A)	18.33	5.32	10.62	12.42	43.86	16.23	27.48	10.26
Rajpo10506	rab3gap2	18.32	6.35	9.43	7.94	29.44	13.99	13.31	18.16
Rajpo07124	semaphorin-3A-like (A)	18.31	0.08	13.37	4.4	7.36	0.85	7.88	7.55
Rajpo13198	slain2	18.29	11.13	19.25	14.25	36.43	18.66	21.02	33.57
Rajpo05278	E3 ubiquitin-protein ligase RNF38 (A)	18.28	8.45	9.24	7.46	4.7	11.26	25.84	16.72
Rajpo11208	AATF	18.28	7.94	7.01	4.1	46.78	19.45	11.5	14
Rajpo15732	scap	18.26	20.19	8.49	7.47	21.12	14.13	13.95	10.78
Rajpo17773	lrp6	18.26	37.29	2.77	1.26	7.64	11.33	4.82	6.59
Rajpo20020	ints8	18.24	4.82	6.02	5.76	39.17	24.64	11.85	14.21
Rajpo11688	nampt	18.24	104.76	25.69	18.87	14.44	8.38	37.44	27.53
Rajpo22130	tmod1	18.24	0.25	220.05	69.2	264.07	5.74	0.47	696.61
Rajpo22605	sodium/hydrogen exchanger 9 (A)	18.24	13.1	0	3.1	10.93	36.44	5.96	1.62
Rajpo04966	slc33a1	18.21	14.97	10.53	17.36	31.67	29.21	34.54	6.05
Rajpo08070	serine/threonine-protein kinase PAK 3 isoform X1 (A)	18.21	4.48	3.71	1.45	32.86	1.27	4.08	5.39
Rajpo10888	arhgap21	18.19	4.32	1.99	1.79	6.6	6.74	10.67	5.79
Rajpo17782	ada2a	18.16	16.58	28.53	28.48	107.05	5.33	14.57	31.58
Rajpo12942	evi5	18.16	15.26	15.23	14.82	32.05	20.12	20.13	15.46
Rajpo02602	2024-03-05	18.16	4.77	10.21	10.16	31.77	18.93	10.52	9.14
Rajpo22327	ebf3a	18.13	0.08	1.75	1.78	2.74	0.08	2.05	14.27
Rajpo08169	agps	18.12	15.22	6.9	14.49	71.65	17.03	72.38	11.07
Rajpo00544	tRNA selenocysteine 1-associated protein 1 isoform X1 (A)	18.11	5.65	36.21	39.89	18.7	11.39	50.33	51
Rajpo06709	E3 ubiquitin/ISG15 ligase TRIM25-like (A)	18.1	17.96	48.49	64	106.99	69	72.24	59.1
Rajpo22495	strn3	18.07	7.62	11.42	6.98	23.97	13.72	10.89	19.58
Rajpo12205	mtpap	18.05	7.61	28.81	25.63	50.13	23.63	24.8	32.87
Rajpo15354	cul5	18.05	6	8.95	5.86	20.65	7.42	12.28	14.33
Rajpo02169	ppwd1	18.01	12.09	29.03	36.84	77.36	29.1	50.6	24.59
Rajpo04888	proto-oncogene tyrosine-protein kinase Yrk-like (A)	17.96	8.9	17.37	5.4	44.61	3.52	16.26	14.07
Rajpo10347	KCNAB2	17.93	1.8	3.72	4.82	43.87	3.49	10.37	10.49
Rajpo16438	zinc finger SWIM domain-containing protein 6 (A)	17.92	3.69	2.11	4.7	7.6	3.42	13.5	3
Rajpo18880	prmt9	17.89	5.84	23.49	34.48	57.32	15.71	32.97	23.36
Rajpo19560	LOW QUALITY PROTEIN: serine/threonine-protein phosphatase 4 regulatory subunit 3B-like (A)	17.89	8.01	10.23	13.15	46.19	14.04	21.41	8.92
Rajpo21430	rps6ka3	17.88	12.14	25.72	50.68	66.07	43.61	89.39	34.19
Rajpo21033	manbal	17.88	7.55	3.35	5.34	29.76	9.63	13.44	7.43
Rajpo14620	DCX	17.86	0.1	0.82	0.3	3.18	5.26	2.27	0.35
Rajpo00488	zfyve19	17.85	2.85	5.25	5.68	22.97	5.11	21.22	4.02
Rajpo20932	washc4	17.84	15.04	6.71	5.31	46.38	21.41	15.92	7.34
Rajpo22079	CHID1	17.82	34.65	28.95	25.85	24.18	23.49	26.43	33.05
Rajpo08176	atp8b1	17.81	13.28	32.95	51.43	50.43	29.81	170.36	16.27
Rajpo03191	mtmr3	17.81	4.42	3.94	3.95	8.63	5.05	7.27	9.07
Rajpo11202	sez6b	17.78	0.02	0.65	0.04	10.8	0.13	0.1	0.04
Rajpo19602	arf-GAP with SH3 domain, ANK repeat and PH domain-containing protein 1 isoform X1 (A)	17.77	4.1	3.09	1.79	27.23	6.17	4.41	4.34
Rajpo13781	cdc40	17.73	3.58	7.56	5.36	22.28	17.13	18.62	14.65
Rajpo14733	aasdhppt	17.72	3.45	7.78	9.18	8.46	28.15	12.51	15.52
Rajpo18913	rnf38	17.69	13.27	6.08	4.74	3.68	14.34	20.76	13.4
Rajpo22175	larp1	17.67	23.59	7.37	3.1	16.98	56.31	7.4	9.68
Rajpo05167	frs2	17.63	2.62	5.15	15.56	30.49	12.96	15.86	5.43
Rajpo07556	nelfb	17.61	5.21	8.14	8.4	34.7	20.6	16.9	5.91
Rajpo01791	ttll12	17.57	8.01	19.54	16.47	35.76	29.15	23.01	5.23
Rajpo16211	2024-09-08	17.57	3.99	0.24	0.11	1.45	1.2	0.78	1.92
Rajpo17297	hpse	17.53	6.42	15.61	21.26	88.22	12.73	36.83	19.07
Rajpo04785	pard6ga	17.53	13.74	4.47	3.66	13.98	23.86	40.16	4.22
Rajpo07610	ras-related GTP-binding protein D-like isoform X1 (A)	17.52	16.85	51.97	37.94	39.16	15.08	3.65	79.87
Rajpo06362	gid4	17.49	9.56	5.48	7.24	69.24	19.5	19.25	13.5
Rajpo07256	ptpro	17.48	0.35	0.31	0.26	20.21	0.97	0.54	0.23
Rajpo08557	LOW QUALITY PROTEIN: atlastin-2-like (A)	17.47	7.29	56.26	30	77.52	9.99	7.77	79.66
Rajpo04667	eyes absent homolog 1 (A)	17.45	0	46.72	28.47	10.54	0.08	5.35	252.71
Rajpo00047	pacrg	17.45	6.56	13.1	19.54	134.37	106.46	4.54	32.18
Rajpo20153	maml3	17.44	1.75	1.34	1.77	9.88	15.55	1.35	7.09
Rajpo03656	rnf139	17.44	17.01	38.38	51.75	65.96	36.32	37.42	21.36
Rajpo01471	zwilch	17.44	6.29	19.9	13.69	39.19	8.68	33.57	26.3
Rajpo20145	elf2	17.42	6.4	5.13	2.69	7.92	6.74	6.03	12.77
Rajpo11121	auh	17.41	24.31	49.26	44.87	30.07	40.87	49.86	62.3
Rajpo12469	mks1	17.4	0.73	3.53	3.13	8.95	13.4	3.59	4.33
Rajpo18067	LOW QUALITY PROTEIN: multidrug resistance-associated protein 5-like (A)	17.37	5.13	14	11.03	12.19	17.38	14.48	5.58
Rajpo04668	LOW QUALITY PROTEIN: protein kinase C-binding protein 1-like (A)	17.36	3.45	3.7	3.55	14.71	33.76	10.82	10.51
Rajpo04638	plekha7b	17.35	32.02	2.58	3.07	38.76	15.35	6.29	0.74
Rajpo05852	si:dkey-91m11.5	17.34	8.31	0.82	0.38	8.78	8.87	3.61	2.47
Rajpo06926	osbpl11	17.33	5.02	4.81	5.61	31.97	10.49	37.39	4.99
Rajpo04323	mrc2	17.33	1.12	2.83	1.73	1.2	0.43	7.11	11.02
Rajpo22922	aqr	17.32	6.89	12.1	13.96	34.08	26.2	30.21	8.41
Rajpo09007	tsnax	17.3	4.61	11.63	17.74	38.78	18.1	39.8	13.67
Rajpo12102	pdpk1	17.29	7.37	4.37	1.53	24.71	7.83	6.19	5.64
Rajpo19028	utp3	17.29	15.68	15.31	27.13	52.92	44.95	64.56	35.61
Rajpo05813	LOW QUALITY PROTEIN: follistatin-related protein 5-like (A)	17.29	0	0	0	0.02	0	0	0
Rajpo00477	hip1r	17.29	16.52	8.69	14.89	7.45	45.11	37.84	10.4
Rajpo06933	itgb5	17.28	1.68	4.02	1.76	4.55	0.41	5.74	7.15
Rajpo02167	trappc13	17.28	5.5	9.53	19.83	67.87	16.71	28.75	8.3
Rajpo01692	pdzd8	17.27	4.43	6.05	6.43	41.57	15.81	13.06	3.47
Rajpo07044	ints4	17.24	9.03	13.79	9.09	37	30.31	19.53	23.53
Rajpo09173	MBD2	17.23	19.01	23.61	37.95	68.12	80.56	144.52	25.07
Rajpo06225	fars2	17.2	9.83	28.38	18.74	117.61	15.02	33.99	16.75
Rajpo15812	nuclear receptor ROR-beta-like (A)	17.19	0.44	0.62	1.52	1.55	0	9.91	4.56
Rajpo08512	spryd3	17.18	9.36	18.14	10.78	36.11	9.05	13.55	18.8
Rajpo07876	psme4b	17.17	6.58	11.8	5.88	5.96	19.61	12.18	16.94
Rajpo03599	casp7	17.17	7.44	20.16	32.35	32.64	1.74	132.81	12.73
Rajpo21897	PHD finger-like domain-containing protein 5A isoform X1 (A)	17.15	3.46	5.6	3	37.05	3.03	24.35	4.88
Rajpo11066	ryk	17.13	14.23	13.79	20.91	109.93	34.99	45.43	19.55
Rajpo13186	scfd2	17.13	9.47	16.59	15.1	50.47	51.49	20.8	18.21
Rajpo02015	slc25a25b	17.13	163.22	4.27	3.56	29.84	1.17	4.43	11.61
Rajpo05597	cblb	17.1	16.18	5.66	1.95	112.78	18.81	7.91	5.18
Rajpo01753	msh2	17.09	3.73	7.1	4.66	50.68	12.69	36.54	7.79
Rajpo07693	gk5	17.06	20.56	4.01	3.93	14.25	6.67	10.15	8.12
Rajpo14873	arsb	17.06	15.56	2.92	1.5	3.71	8.02	2.06	5.62
Rajpo00325	vps16	17.05	3.61	10.41	10.38	37.64	25.02	17.18	14.5
Rajpo10462	slc30a9	17.05	7.59	10.28	12.46	37.89	18.37	23.26	15.82
Rajpo12064	shoc2	17.04	10.21	3.08	1.51	13.16	5.35	4.54	4.68
Rajpo21091	EXOC6B	17.04	5.59	3.05	1.31	1.82	9	6.74	4.82
Rajpo09975	LOW QUALITY PROTEIN: AP-1 complex subunit beta-1 (A)	17.03	4.49	1.82	0.9	13.59	4.4	12.92	3.22
Rajpo18459	lpgat1	17.02	1.49	5.95	6.05	11.75	1.26	26.2	6.16
Rajpo08288	glycerol-3-phosphate acyltransferase 1, mitochondrial-like (A)	17.02	11.3	5.63	5.38	83.87	20.66	11.84	6.66
Rajpo20540	LOW QUALITY PROTEIN: probable E3 ubiquitin-protein ligase HECTD4 (A)	17	3.68	4.98	1.37	9.44	35.54	2.23	4.72
Rajpo18108	LOW QUALITY PROTEIN: ankyrin-2-like (A)	16.98	0.02	3.28	0.94	2.6	1.02	0.19	0.85
Rajpo18024	scyl2	16.98	15.98	11.49	14.7	52.29	27.53	28.79	5.83
Rajpo11534	washc5	16.96	19.76	10.04	11.77	54.2	20.07	30.39	10.25
Rajpo12182	dnajc10	16.95	2.46	8.05	12.97	17.91	17.51	36.7	5.7
Rajpo16905	LOW QUALITY PROTEIN: mediator of RNA polymerase II transcription subunit 13-like (A)	16.91	6.03	3.77	2.19	8.58	24.35	5.38	6.92
Rajpo19098	atxn7l3	16.9	6.71	4.6	3.91	7	7.54	6.89	10.04
Rajpo02476	taok1	16.89	6.24	4.4	2.07	12.01	3.85	5.17	6.8
Rajpo08477	OSTF1	16.89	15.44	8.06	23.54	16.11	12.61	90.84	6.92
Rajpo07601	orc3	16.88	8.78	27.33	22.5	106.9	39.16	31.71	23.76
Rajpo01361	ogfod3	16.87	20.33	6.1	5.08	20.2	40.37	11.5	5.22
Rajpo02664	jarid2	16.86	3.68	2.66	1.76	27.21	9.01	7.32	3.37
Rajpo12002	sprouty-related, EVH1 domain-containing protein 2 (A)	16.85	14.9	5.89	2.53	21.48	3.65	14.86	6.44
Rajpo16717	dcaf12	16.85	6.99	14.44	26.71	64.47	16.75	41.63	14.72
Rajpo04452	rasal2	16.81	3	11.29	6.29	13.57	11.27	9.25	14.19
Rajpo00257	suclg2	16.8	98.11	20.35	17.43	13.36	40.37	32.96	32.16
Rajpo02160	fat1	16.78	10.43	2.13	1.22	21.26	5.16	5.81	4.05
Rajpo21562	ltbp1	16.77	4.29	1.97	1.32	3.63	2.26	10.88	3.05
Rajpo01789	aass	16.77	49.93	153.81	83.72	28.83	110.47	86.13	52.77
Rajpo04482	pcsk1	16.76	0	0.51	1.25	0.12	0	6.84	0.27
Rajpo04294	kcnh6a	16.67	0.47	2.5	1.2	13.12	4.2	4.16	0.56
Rajpo03642	LOW QUALITY PROTEIN: dystrobrevin alpha-like (A)	16.66	0.05	35	25.28	2.89	13.8	2.07	43.22
Rajpo20273	GRIA2	16.61	0	0.19	0	0.36	0	0.39	0.03
Rajpo00637	kctd10	16.61	9.56	5.35	5.39	17.22	20.64	23.55	16.45
Rajpo20173	scara3	16.61	0.08	1.25	0.81	2.64	7.41	12.98	6.47
Rajpo16417	pcgf1	16.6	4.14	4.55	4.06	54.66	30.28	7.28	16.22
Rajpo20594	nol6	16.59	13.36	9.89	12.26	47.52	29.03	36.54	8.69
Rajpo14718	eif5b	16.59	15.66	38.43	46.76	168.03	143.67	68.32	33.97
Rajpo10320	tigger transposable element-derived protein 1-like isoform X1 (A)	16.58	10.94	19.55	10.68	94.48	43.07	12.26	40.02
Rajpo14542	larp1b	16.56	13.03	8.44	4.94	33.12	82.68	5.79	9.16
Rajpo05578	mlycd	16.54	6.89	15.13	11.87	39.81	18.65	16.46	15.66
Rajpo06941	pgbd5	16.53	7.62	10.8	24.42	42.76	18.41	45.31	4.41
Rajpo21974	CACNG3	16.52	0.47	3.26	1.33	3.05	13.83	0.81	0.42
Rajpo04127	LOW QUALITY PROTEIN: plasma membrane calcium-transporting ATPase 1-like (A)	16.49	3.57	5.1	1.71	1.53	6.75	1.27	5.65
Rajpo08952	b9d1	16.48	7.86	5.59	5.21	12.23	20.95	14.19	13.31
Rajpo13180	cysteine-rich hydrophobic domain-containing protein 2 (A)	16.47	16.72	6.98	15.15	21.97	19.37	26.79	5.4
Rajpo06157	LOW QUALITY PROTEIN: acetyl-coenzyme A synthetase 2-like, mitochondrial (A)	16.45	27.53	15.8	8.47	2.06	10.68	6.53	36.47
Rajpo21411	wdr47	16.45	2.26	5.04	3.4	48.4	13.82	4.77	6.82
Rajpo12007	sodium/potassium/calcium exchanger 2-like (A)	16.44	0	0.2	0.24	15.38	0	0	0.28
Rajpo22292	mef2cb	16.43	20.12	183.41	87	13.7	14.4	1.74	371.98
Rajpo04379	furin	16.43	225.62	10.61	3.23	43.41	6.25	9.22	12.76
Rajpo13790	ttc17	16.41	29.08	13.08	32.09	67.6	9.73	74.5	10.22
Rajpo15068	gabrb3	16.39	0	0.18	0.2	0.09	0	0	0
Rajpo02092	nup54	16.37	31.81	11.41	11.15	58.67	12.68	27.21	14.36
Rajpo10348	chromodomain-helicase-DNA-binding protein 5-like (A)	16.32	0.08	0.98	0.31	15.1	0.95	0.92	1.14
Rajpo22856	abcg4a	16.32	0.07	0.14	0.19	0.07	0.07	0	0
Rajpo14242	arid2	16.31	6.91	3.76	3.91	38.97	20.56	9.23	5.9
Rajpo04631	protein scribble homolog (A)	16.31	9.81	9.75	3	11.08	20.14	4.9	10.3
Rajpo16456	interferon-related developmental regulator 2-like isoform X1 (A)	16.29	14.05	5.06	7.55	15.65	14.4	30.07	3.27
Rajpo09753	rab11 family-interacting protein 1-like (A)	16.28	17.45	2.78	1.69	6.01	7.47	6.17	4.78
Rajpo05915	top3b	16.28	2.86	10.04	8.59	52.54	14.33	12.08	8.59
Rajpo03988	cyclic AMP-responsive element-binding protein 1-like (A)	16.26	20.77	8.75	13.22	90.06	19.33	42.46	20.79
Rajpo15643	ift122	16.25	3.67	4.55	5.47	19.09	24.08	8.91	6.02
Rajpo10597	las1l	16.25	5.45	17.42	32.52	48.76	17.45	56.66	19.69
Rajpo09394	nck1	16.25	10.48	11.68	33.95	51.74	3.27	95.69	8.71
Rajpo11163	LOW QUALITY PROTEIN: serine/threonine-protein phosphatase 2A 55 kDa regulatory subunit B delta isoform-like (A)	16.22	9.78	11.23	19.57	55.4	14.18	39.77	15.96
Rajpo13336	mib1	16.21	6.06	3.54	3.08	20.41	5.54	8.56	10.56
Rajpo10754	ivd	16.19	20.16	105.66	30.57	31.46	31.99	19.64	45.92
Rajpo22419	stx18	16.19	11.46	21.7	37.64	63.77	30.02	83.87	32.25
Rajpo20345	samd4a	16.18	4.84	15.49	7.66	16.22	8.69	2.87	15.68
Rajpo16119	csnk2a2b	16.15	3.43	23.33	33.66	78.75	14.99	34.23	22.92
Rajpo20344	cgrrf1	16.14	6.37	10.87	9.82	13.65	30.68	13.47	24.81
Rajpo21908	rnf216	16.14	14.96	18.43	9.55	81.87	31.53	11.73	38.83
Rajpo10413	bap1	16.14	8.6	5.78	6.34	73.43	20.48	11.78	10.62
Rajpo22487	iron-sulfur protein NUBPL-like (A)	16.13	4.6	7.65	6.93	5.41	13.72	9.78	8.96
Rajpo12475	hip1	16.12	6.33	2.74	1.55	12.31	22.4	6.33	6.7
Rajpo18910	rhophilin-1-like (A)	16.12	5.58	0.69	1.42	0.56	3.05	1.15	0.66
Rajpo21286	usp32	16.11	7	2.98	2.78	8.23	4.74	10.55	7.38
Rajpo21470	histone deacetylase complex subunit SAP30L-like isoform X1 (A)	16.09	4.06	12.43	12.6	252.02	58.24	27.34	19.75
Rajpo09542	E2F-associated phosphoprotein-like (A)	16.09	6.95	12.96	15.8	38.55	25.87	22.73	33.7
Rajpo07012	naglu	16.08	16.23	11.05	10.33	4.73	26.33	31.35	8.19
Rajpo16446	PDE4D	16.08	3.59	6.64	2.17	6.8	1.04	5.42	1.08
Rajpo19881	dcaf13	16.06	10.72	22.09	39.47	49.63	26.25	99.53	27.25
Rajpo01534	dcp1a	16.04	7.62	13.64	12.26	39.74	18.61	11.71	28.16
Rajpo19106	BMP and activin membrane-bound inhibitor homolog (A)	16.03	0.17	0.78	0	12.62	90.44	3.05	0.3
Rajpo19672	hapln1b	16.03	6.06	1.32	1.85	0.82	0.15	12.81	8.08
Rajpo15590	galnt2	16.02	15.02	2.28	5.13	11.08	1.14	27.18	5.37
Rajpo15976	vcla	15.99	6.08	13.19	4.71	21.01	7	15.18	10.78
Rajpo06725	dapk3	15.97	8.63	2.21	2.21	58.09	6.52	11.63	2.52
Rajpo12648	paqr3a	15.96	3.27	11.26	12.27	41.32	3.37	19.88	13.34
Rajpo19511	F-box/LRR-repeat protein 20 (A)	15.93	2.66	3.18	2.14	27.12	2.4	10.84	2.43
Rajpo22892	TBCEL	15.92	5.67	5.65	4.82	34.21	13.02	6.34	10.44
Rajpo22860	DSCAML1	15.92	0.02	0.29	0.16	12.33	3.67	0.27	0.03
Rajpo12949	LOW QUALITY PROTEIN: transforming growth factor beta receptor type 3-like (A)	15.9	3.48	4.48	1.48	5.66	8.27	5.14	19.58
Rajpo12757	trip4	15.89	4.9	7.88	6.12	51.6	17.46	18.08	6.11
Rajpo20439	LOW QUALITY PROTEIN: serine/threonine-protein kinase DCLK1-like (A)	15.87	0	0	0.11	22.24	0.9	1.67	0
Rajpo05058	WD repeat-containing protein 20 (A)	15.86	5.18	3.86	4.98	59.05	12.66	18.13	6.19
Rajpo10155	rbl2	15.84	6.61	4.46	1.9	2.81	20.13	6.34	9.14
Rajpo04937	smarcal1	15.84	4.84	6.6	5.39	25.81	14.77	9.83	12.36
Rajpo10324	NACHT, LRR and PYD domains-containing protein 12-like isoform X1 (A)	15.79	13.52	8.75	5.74	5.74	20.79	13.89	13.9
Rajpo12168	gas8	15.78	11.49	13.77	52.06	40.47	32.97	48.84	19.12
Rajpo05093	LOW QUALITY PROTEIN: coiled-coil and C2 domain-containing protein 1A-like (A)	15.77	9.6	4.6	2.43	8.91	8.35	6.76	5.28
Rajpo02325	mtx2	15.77	10.29	35.12	47.81	30.91	31.78	42.63	55.74
Rajpo08278	stam2	15.75	7.82	4.55	1.67	23.97	9.41	10.89	4.18
Rajpo16141	mitochondrial sodium/hydrogen exchanger 9B2-like (A)	15.75	2.36	0.8	0.22	3.68	1.04	1.06	2.7
Rajpo01970	adamts18	15.72	0.05	0.17	0	0.02	0.15	0.35	0
Rajpo00211	agtpbp1	15.66	2.37	6.26	4.94	14.54	8.04	3.17	2.29
Rajpo17312	kelch-like protein 13 isoform X1 (A)	15.62	2.85	5.49	4.95	40.13	3.33	8.85	6.27
Rajpo05336	det1	15.62	4.87	8.84	5.16	37.29	10.69	8.24	11.11
Rajpo19907	slc9a1	15.62	4.03	1.24	1.47	48.94	6.23	13.61	3.68
Rajpo14610	nsd2	15.61	3.51	4.56	5.17	29.02	16.54	10.75	6.31
Rajpo13092	zc3h14	15.6	8.98	6.29	6.82	57.18	28.36	22.02	8.45
Rajpo16356	adam9	15.6	2.66	1.72	0.79	4.96	2.85	3.75	2.94
Rajpo17248	gpat4	15.58	8.06	16.2	5.62	20.88	15	8.72	32.63
Rajpo01385	armt1	15.58	7.75	19.89	25.88	41.07	31.16	35.79	21.35
Rajpo00351	zinc finger and BTB domain-containing protein 47 isoform X1 (A)	15.56	5.69	2.71	1.06	4.01	3.73	1.71	5.09
Rajpo17168	tamm41	15.56	9.28	23.75	35.93	14.51	37.71	31.18	33.85
Rajpo20824	cdc16	15.54	7.21	14.29	16.26	62.19	27.29	22.5	19.65
Rajpo06745	receptor-type tyrosine-protein phosphatase delta isoform X2 (A)	15.53	12.1	4.46	1.18	1.87	12.37	0.22	2.02
Rajpo10695	glypican-1-like (A)	15.53	4.84	5.61	7.9	1.88	1.58	44.55	17.27
Rajpo11162	echinoderm microtubule-associated protein-like 4 isoform X1 (A)	15.52	7.79	12.64	24.11	37.84	7.52	24.06	11.58
Rajpo14317	chd2	15.51	8.79	18.41	3.51	3.58	14.25	3.83	5.83
Rajpo03880	slc6a9	15.51	38.55	1.53	1.34	0.08	1.15	0	1.62
Rajpo00285	sentrin-specific protease 2-like isoform X1 (A)	15.51	4.63	18.51	27.7	41.96	35.13	24.35	34.63
Rajpo00022	skiv2l2	15.5	6.49	9.45	13.06	33.73	15.51	25.81	9.35
Rajpo21705	sox13	15.47	21.62	5.23	3.13	10.38	8.69	14.91	2.27
Rajpo18161	zgc:63587	15.47	6.35	2.9	2.59	6.12	6.36	29.67	5.1
Rajpo15009	mpp1	15.41	6.54	12.31	12.03	0.86	3.75	4.64	101.94
Rajpo02278	probable E3 ubiquitin-protein ligase MID2 (A)	15.41	5.5	3.16	1.21	52.82	2.39	7.38	5.1
Rajpo03871	sestrin-3-like (A)	15.4	1	3.3	1.96	6.13	1.5	1.81	14.45
Rajpo15434	dync2li1	15.39	6.19	14.38	21.26	15.89	73.43	15.62	17.74
Rajpo11212	NIPBL	15.39	7.44	7.69	6.25	21.7	17.97	13.31	9.28
Rajpo02604	btaf1	15.36	4.94	5.8	8.64	34.59	10.87	17.91	6.03
Rajpo03662	thoc1	15.36	7.55	14.16	23.32	106.82	22.32	55.92	13.26
Rajpo20368	mitochondrial import receptor subunit TOM20 homolog (A)	15.34	18.23	89.26	132.01	194.04	85.22	114.16	201.92
Rajpo02787	LOW QUALITY PROTEIN: sodium-driven chloride bicarbonate exchanger (A)	15.34	0	0	0	2.75	0	0.01	0
Rajpo01360	hexd	15.33	10.86	9.78	19	23.54	16.14	18.61	13.95
Rajpo12647	antxr2a	15.33	11.49	1.83	1.39	8.57	1.51	9.09	17.06
Rajpo05478	insig2	15.32	4.72	6.12	13.51	36.18	11.37	24.14	12.62
Rajpo07370	anapc5	15.32	4.73	4.55	4.23	17.71	13.51	13.35	9.1
Rajpo08482	rorb	15.32	0.04	0.75	0.17	0.45	0	0	0.07
Rajpo04088	cunh12orf4	15.31	10.62	4.15	5.98	28	10.5	12.03	4.8
Rajpo14908	emid1	15.31	0.7	0.96	0.52	8.65	0	1.35	2.48
Rajpo19003	mfsd14a	15.3	7.62	9.73	8.46	21.64	30.74	18.95	5.74
Rajpo16276	LOW QUALITY PROTEIN: protein CBFA2T1-like (A)	15.3	1.14	5.02	2.41	6.96	0.54	2.29	6.88
Rajpo16989	dhtkd1	15.3	66.71	53.9	23.14	65.56	61.45	16.43	17.25
Rajpo13811	calcr	15.29	0	0.13	0	0.07	0	0	0
Rajpo01151	anks1ab	15.29	9.76	7.18	7.48	42.79	18.29	10.21	4.12
Rajpo18216	ift74	15.28	4.55	10.41	11.48	73.32	63.95	8.64	17.31
Rajpo07317	KCTD16	15.28	0	0.08	0	0.2	0.24	0.39	0.07
Rajpo01144	fance	15.26	4.98	45.49	40.15	61.19	18.96	19.97	60.71
Rajpo10212	loxl4.L	15.22	5.13	14.71	7.01	18.33	2.54	21.06	29.42
Rajpo06274	heca	15.21	3.33	6.8	5.51	11.18	4.77	6.24	14.5
Rajpo09313	transmembrane protein 87B-like isoform X1 (A)	15.21	4.76	7.75	7.87	16.22	12.68	13.85	10.95
Rajpo10099	rictor	15.19	3.9	3.31	1.49	12.21	7.16	3.4	4.4
Rajpo05637	slc25a15	15.17	235.08	240.42	157.98	145.26	72.2	238.54	31.1
Rajpo14602	cunh18orf25	15.17	3.96	2.55	2.61	17.42	2.96	11.22	4.21
Rajpo08407	mapk8ip3	15.17	0.89	0.39	0.3	19.89	1.4	0.52	0.35
Rajpo10407	grip2b	15.14	0	0	0.02	0.17	0.04	0	0
Rajpo13568	tnks2	15.14	2.41	6.27	4.92	36.34	8.85	10.17	6.12
Rajpo21739	fundc1	15.14	4.13	20.56	12.57	25.98	18.53	18.99	7.68
Rajpo09765	adck1	15.11	2.25	6.66	2.2	2.69	6.33	4.96	2.35
Rajpo16564	gmcl1	15.1	3.62	7.86	12.74	18.01	43.06	21.9	10.63
Rajpo02108	arhgap24	15.09	2.92	12.9	7.41	23.82	67.73	2.14	12.43
Rajpo01420	LOW QUALITY PROTEIN: sister chromatid cohesion protein PDS5 homolog B (A)	15.07	5.2	6.88	5.55	29.52	23.23	9.7	18.32
Rajpo06704	eps15l1	15.06	13.28	7.09	6.54	28.34	15.12	22.87	11.05
Rajpo01068	transmembrane emp24 domain-containing protein 5-like (A)	15.04	45.02	8.68	5.15	19.04	11.06	9.99	21.33
Rajpo10928	uxs1	15.02	3.81	28.71	52.27	19.34	6.05	205.29	18.35
Rajpo19910	rnf19b	15.01	0.8	0.62	0.54	8.54	4.71	0.99	0.42
Rajpo19153	mre11a	15.01	8.64	8.85	8.45	41.53	31.07	22.34	16.63
Rajpo14537	gab1	14.96	17.36	8.08	11.87	18.99	18.82	24.62	10.83
Rajpo02824	casz1	14.94	0.02	3.16	0.82	0.58	0.29	0.12	4.05
Rajpo18509	LOW QUALITY PROTEIN: talin-2-like (A)	14.93	5.18	3.39	2.16	6.94	3.46	5.29	3.91
Rajpo08707	kctd18	14.92	3.45	8.95	10.76	27.39	9.21	15.92	15.67
Rajpo06030	pde3b	14.88	16	3.21	3.35	18.76	18.33	5.97	3.85
Rajpo11757	lgi2	14.86	16.68	1.27	1.7	2.59	0.28	0	0
Rajpo15076	inosine-uridine preferring nucleoside hydrolase-like (A)	14.84	0.47	34.96	32.05	2.92	0	11.11	12.55
Rajpo05039	sos2	14.83	13.29	15.23	8.74	53.57	23.96	16.71	15.87
Rajpo14813	AIDA	14.83	13.29	25.73	24.89	52.64	15.13	20.65	70.99
Rajpo07739	supt3h	14.8	8.46	13.47	12.78	113.53	25.13	20	23.43
Rajpo06707	ap1m1	14.8	9.7	4.57	2.24	20.14	9.26	12.7	6.25
Rajpo10283	LOW QUALITY PROTEIN: RNA-binding protein 26-like (A)	14.77	10.32	8.06	5.44	75.98	43.28	11.42	4.74
Rajpo11123	ror2	14.77	8.3	3.22	1.26	3.18	1.42	3.38	3.25
Rajpo06786	taf1b	14.76	5.08	8.52	15.24	95.48	18.92	34.66	19.78
Rajpo07798	tapt1	14.74	8.63	28.6	25.13	16.22	33.23	19.73	75.24
Rajpo00483	si:dkeyp-14d3.1	14.74	1.59	0.62	0.71	8.63	0.71	1.91	0.89
Rajpo02474	git1	14.74	6.64	3.35	1.05	22.05	6.1	5.56	2.11
Rajpo17850	myot	14.73	0	215.31	60.77	0.06	0	0.72	522.24
Rajpo18647	LOW QUALITY PROTEIN: Friend leukemia integration 1 transcription factor-like (A)	14.72	7.36	12.29	2.25	5.28	5.44	8	15.55
Rajpo06994	hdx	14.71	4.7	9.61	8.35	58.23	5.29	8.03	13.53
Rajpo20602	celf4	14.69	0.22	0	0	3.01	0.09	0.03	0
Rajpo18139	paaf1	14.68	9.55	31.46	44.95	36.97	26.73	36.47	24.25
Rajpo10409	SRGAP3	14.62	0.17	9.99	3.22	4.72	0.81	2.57	3.43
Rajpo10771	hdac5	14.62	4.37	18.24	7.31	9.15	7.51	6.22	14.4
Rajpo14632	tbc1d19	14.59	1.11	6.05	8.03	11.24	7.36	6.79	10.02
Rajpo00053	iqgap1	14.56	4.8	6.26	2.55	26.63	33.92	40.48	6.64
Rajpo18607	xpot	14.53	9.53	11.1	10.87	21.17	25.19	18.26	12.07
Rajpo09988	S-adenosyl-L-methionine-dependent tRNA 4-demethylwyosine synthase-like (A)	14.52	7.8	11.21	7.53	46.97	26.75	18.59	20.39
Rajpo01029	kcnn3	14.52	2.98	3.94	1.12	1.53	6.78	1.92	4.95
Rajpo03567	mboat1	14.51	0.32	5.26	5.63	39.55	342.29	6.61	10.31
Rajpo09122	abtb1	14.5	2.29	8.16	7.73	6.98	13.57	10.71	17.25
Rajpo22805	LOW QUALITY PROTEIN: protein FAM171A2-like (A)	14.5	1.39	1.2	0.51	1.89	0.45	1.5	3.41
Rajpo15321	uck2	14.49	49.91	7.14	13.65	255.67	63.86	52.57	5.37
Rajpo03231	MAGUK p55 subfamily member 6-like isoform X1 (A)	14.47	1.1	1.2	1.13	5.94	0.18	5.29	0.61
Rajpo06017	ndst1b	14.47	1.99	1.61	0.98	1.42	5.28	1.42	5.85
Rajpo00789	tbck	14.46	6.68	17.45	13.16	25.42	31.87	24.67	17.77
Rajpo00759	TANGO6	14.45	6.15	7.95	5.95	15.17	23.65	6.9	10.57
Rajpo22057	spopla	14.45	4.22	5.29	6.6	34.02	10.15	15.7	7.83
Rajpo15295	cytoplasmic dynein 1 intermediate chain 1 isoform X1 (A)	14.45	5.62	0.88	0.28	106.02	0.68	0.41	0.14
Rajpo09507	gad2	14.43	0.03	0.05	0	0	0.17	0.27	0.1
Rajpo14450	lrba	14.42	5.85	1.79	2.37	9.77	11.25	13.65	1.34
Rajpo20580	alpha-actinin-2 isoform X2 (A)	14.42	0.22	75.47	10.56	0.66	2.76	0.08	3.53
Rajpo00879	cat eye syndrome critical region protein 2 isoform X1 (A)	14.37	8.13	5.39	6.81	31.77	7.3	16.58	2.59
Rajpo20573	mmab	14.36	7.98	31.2	21.01	58.26	23.71	39.54	14.48
Rajpo04264	trim33	14.34	6.78	7.09	6.13	26.47	11.42	9.89	5.84
Rajpo20180	kpna5	14.33	5.43	6.55	4.59	59.74	4.7	11.66	10.48
Rajpo17865	lisH domain and HEAT repeat-containing protein KIAA1468 homolog (A)	14.3	7.09	6.33	9.16	21.41	17.43	18.36	6.04
Rajpo11207	acaca	14.3	0.76	7.56	2.7	7.87	9.16	5.01	5.37
Rajpo03444	man2b1	14.28	41.18	6.04	3.09	91.43	31.12	8.34	27.9
Rajpo01152	taf11	14.28	12.96	14.65	17.18	35.19	12.89	18.67	18.86
Rajpo21063	unc5b	14.26	2.94	2.8	1.33	4.11	61.59	5.67	14.96
Rajpo11836	epc2	14.25	5.19	4.76	4.66	34.72	10.11	8.86	7.24
Rajpo12338	KCTD1	14.25	1	1.67	0.94	17.56	2.1	1.33	1.47
Rajpo00155	palmitoyl-protein thioesterase ABHD10, mitochondrial (A)	14.23	6.41	2.88	1.79	12.2	11.54	4.42	5.03
Rajpo06394	abcb8	14.23	8.36	6.37	4.71	7.11	12.33	12.95	6.33
Rajpo05491	mgat5	14.23	1.55	3.53	6.39	9.45	1.59	12.52	3.83
Rajpo00383	dctd	14.22	22.08	76.47	89.46	138.48	75.65	90.97	113.65
Rajpo08885	rbm18	14.22	8.03	9.58	9.64	33.32	9.27	28.62	10.05
Rajpo09058	transmembrane protein 189-like (A)	14.22	9.73	2.25	4.27	48.87	8.67	20.45	7.77
Rajpo05080	tolloid-like protein 1 (A)	14.21	0.13	0.11	0.03	3.39	0.11	0.2	0.3
Rajpo20638	solute carrier family 2, facilitated glucose transporter member 5-like (A)	14.21	42.62	15.97	17.65	28.04	18.12	18.16	4.5
Rajpo03943	wls	14.21	1.85	9.65	8.58	44.98	11.45	58.93	9.28
Rajpo09605	swap70b	14.18	22.06	5.24	3.99	13.63	7.77	15.93	9.04
Rajpo20997	ccndbp1	14.18	7.03	17.03	16.12	13.9	25.97	19.21	29.25
Rajpo21055	mix23	14.18	16.41	25.53	16.1	42.1	6.57	44.77	4.02
Rajpo22964	cpne4b	14.18	0.03	0.85	0.09	3.78	0	0.16	0.05
Rajpo06468	cnot8	14.17	8.49	9.82	9.44	25.29	10.32	29.94	10.18
Rajpo22334	dock1	14.16	14.78	7.16	12.65	22.05	66.14	39.37	9.15
Rajpo05275	kif2a	14.15	2.88	6.23	6.11	24.15	6.46	11.48	11.76
Rajpo06970	transcription factor IIIA-like (A)	14.14	12.29	12.98	20.71	60.59	33.91	39.91	28.12
Rajpo01087	potassium voltage-gated channel subfamily B member 2 (A)	14.12	0.02	0.64	0.03	0.97	0.05	0.02	0.07
Rajpo13731	med14	14.11	6.17	9.29	7.4	38.35	27.1	21.77	9.02
Rajpo19578	bbox1	14.11	7.21	43.58	16.6	21.09	33.08	14.55	12.57
Rajpo19985	polr1b	14.1	7.42	14.56	8.4	34.25	28.26	13.62	26.83
Rajpo09584	nat10	14.09	6.57	9.9	12.84	49.49	15.45	29.91	10.47
Rajpo09883	nr2c1	14.08	4.96	8.32	8.7	27.74	18.11	13.79	17.63
Rajpo01016	rfc4	14.06	4.52	11.04	17.4	57.77	16.7	37.5	14.83
Rajpo19333	lratb.1	14.02	25.65	15.23	7.17	18.76	40.58	5.18	13.61
Rajpo08564	DHX57	14.01	4.04	6.91	4.4	41.53	8.89	6.81	5.54
Rajpo18104	ndst3	14.01	15.09	1.13	0.68	18.25	2	0.48	3.74
Rajpo21738	kdm6a	14	5.87	4.85	5.9	24.13	23.16	12.98	6.84
Rajpo18100	sec24d	13.98	22.75	5.5	2.43	7.01	27.66	11.73	3.47
Rajpo12468	bcl7b	13.98	10.49	8.48	6.62	6.54	11	22.43	9.93
Rajpo11596	klhdc3	13.98	17.72	100.75	58.08	77.91	19.72	25.95	119.96
Rajpo22937	RBMS3	13.97	3.32	5.28	1.97	6.27	0.48	10.87	9.94
Rajpo02072	LOW QUALITY PROTEIN: neural cell adhesion molecule 2 (A)	13.97	0.1	1.57	0.53	1.94	0.29	1.42	2.23
Rajpo03650	garem	13.95	5.76	3.33	5.8	69.03	7.73	15.66	6
Rajpo00955	rfc5	13.94	4.35	15.77	27.74	201.84	9.52	69.69	6.03
Rajpo01622	inactive phospholipase C-like protein 2 (A)	13.93	2.04	16.19	8	2.52	1.07	2.05	33.24
Rajpo16277	triqk	13.91	30.97	9.43	7.5	11.01	1.56	12.47	5.59
Rajpo00337	uncharacterized protein LOC109912772 (A)	13.9	0.2	8.87	13.83	22.3	13.89	14.48	28.18
Rajpo19407	LOW QUALITY PROTEIN: receptor-type tyrosine-protein phosphatase mu (A)	13.9	1	3.51	1.16	2.95	1.6	0.58	6.17
Rajpo19081	fam135a	13.9	4.41	0.64	1.05	6.9	13.05	8.72	3.41
Rajpo09617	st5	13.89	3.11	2.01	2.26	34.56	1.07	10.24	4.6
Rajpo06664	mitochondrial coenzyme A transporter SLC25A42 (A)	13.89	52.25	25.49	9.63	15.36	13.15	5.87	10.35
Rajpo21742	amine oxidase [flavin-containing] B-like (A)	13.87	54.93	2.54	1.78	3.21	1.5	2.23	6.45
Rajpo21347	qrsl1	13.86	3.28	50.61	27.34	41.46	24	16.16	67.61
Rajpo21270	ube3c	13.86	5.41	6.11	5.82	25.97	11.81	17.48	12.96
Rajpo16193	NOVA2	13.85	0.48	2.62	1.85	1.94	1.68	0.97	3.48
Rajpo14568	exosc9	13.83	2.98	9.69	5.89	24.14	18.74	26.55	13.32
Rajpo01304	triple functional domain protein isoform X1 (A)	13.83	3.21	3.69	3.68	2.47	6.29	9.19	6.63
Rajpo17198	dis3l2	13.81	5.49	7.13	6.78	27.8	12.92	14.37	6.39
Rajpo12047	SFXN3	13.79	2.6	5.6	0.95	13.18	2.3	3.31	1.22
Rajpo19684	ankrd27	13.78	5.45	3.63	3.54	29.17	16.32	7.12	8.78
Rajpo03653	protein EFR3 homolog A isoform X1 (A)	13.78	5.81	2.05	1.54	14.68	4	7.6	2.63
Rajpo00209	ntrk2a	13.77	0.04	0.22	0.6	4.64	0.11	8.75	0.81
Rajpo05759	med27	13.76	8.66	7.64	9.24	36.55	14.62	33.65	8.85
Rajpo21332	Krueppel-like factor 12 isoform X1 (A)	13.76	3.05	5.9	8.34	49.09	4.17	90.74	8.99
Rajpo11446	LOW QUALITY PROTEIN: protein KIAA0100 homolog (A)	13.74	2.77	5.18	2.83	12.08	8.03	7.99	5.44
Rajpo01456	spg11	13.74	8.01	5.18	4.55	7.42	11.02	4.97	5.78
Rajpo19640	trpm3	13.71	0.02	0.22	0	0.4	0.34	0.01	0.17
Rajpo13501	bromodomain-containing protein 7-like isoform X1 (A)	13.71	8.84	17.01	18.48	76.88	24.04	30.07	12.38
Rajpo22009	coronin-7 isoform X1 (A)	13.7	9.31	6.06	6.84	33.01	18.01	19.54	5.55
Rajpo04672	sbf1	13.68	3.08	3.32	2.48	10.42	1.63	9.9	4.99
Rajpo18987	keap1	13.67	26.41	14.66	13.72	35.73	22.09	28.71	15.12
Rajpo08673	hspa14	13.66	4.72	13.4	10.45	62.14	26.08	25.49	25.21
Rajpo08938	tnfaip1	13.64	6.32	5.58	10.45	56.88	9.17	28.96	4.55
Rajpo09896	armc9	13.63	7.32	5.4	4.48	15.37	11.61	7.83	3.58
Rajpo22927	cpvl	13.62	137.35	25.5	10.43	11.54	9.79	10.69	39.07
Rajpo08533	itsn1	13.59	7.82	10.27	9.67	15.8	6.3	23.47	8.03
Rajpo02022	pomt1	13.58	10.83	18.21	13.38	78.77	21.34	9.5	18.15
Rajpo17604	sv2	13.56	13.21	22.17	25.3	30.72	23.32	23.61	35.93
Rajpo21608	ipo13b	13.56	2.03	4.09	4.82	33.45	11.37	9.01	4.65
Rajpo13078	proton-coupled amino acid transporter 1-like (A)	13.53	2.82	3.4	5.3	7.9	6.51	21.31	8.05
Rajpo17702	rbbp5	13.51	8.48	7.63	7.88	28.51	19.15	17.09	13.32
Rajpo04994	scin	13.5	2.65	19.7	20.68	10.58	14.54	44.04	11.9
Rajpo11243	LOW QUALITY PROTEIN: adenylate cyclase type 1-like (A)	13.48	0	0	0.04	2.48	0.04	0	0.03
Rajpo02400	cpamd8	13.48	1.56	0.21	0.09	4.71	11.49	0.73	0.64
Rajpo07109	fam212a	13.48	0.31	12.44	24.94	16.22	3.19	260.37	8.77
Rajpo21348	rtn4ip1	13.46	7.84	37.91	26.4	59.85	15.97	23.77	32.37
Rajpo13032	ESYT1	13.46	1.52	2.34	1.62	3.1	4.96	16.27	6.12
Rajpo04466	cds2	13.45	6.03	1.09	1.15	8.36	2.9	9.55	1.2
Rajpo17278	arl5a	13.45	5.31	6.48	10.37	46.98	9.47	27.08	7.56
Rajpo04111	GRB2	13.44	13.16	8.61	5.31	21.64	9.07	19.9	15.45
Rajpo15127	lats2	13.43	1.66	6.81	3.9	8.64	4.88	12.3	59.39
Rajpo14181	slc13a5a	13.41	0.03	1.42	1.09	1.51	2.82	0.63	9.96
Rajpo08545	ltbp1	13.38	11.49	0.64	0.74	8.24	2.81	3.92	4.1
Rajpo05695	regulator of nonsense transcripts 3B-like (A)	13.38	6.41	21.86	18.58	118.47	23.36	22.31	11.23
Rajpo00292	FAM117B	13.37	4.56	3.75	3.55	125.81	39.3	6.31	2.25
Rajpo05551	mitogen-activated protein kinase 11 (A)	13.35	1.73	4.16	6.97	46.28	3.01	48.95	3.65
Rajpo16110	brpf3	13.34	3.7	4.46	4.5	40.51	9.03	4.83	8.59
Rajpo14098	uncharacterized protein KIAA0895 homolog isoform X1 (A)	13.34	0.5	0.06	0.57	19.24	6.05	1.41	1.09
Rajpo04422	iqgap2	13.34	40.03	1.96	1.31	11.76	31.15	8.22	1.01
Rajpo00814	fam160a2	13.33	2.6	19.14	7.73	25.58	10.37	11.61	12.31
Rajpo04698	phtf1	13.33	5.47	10.7	7.09	12.38	0.48	3.27	4.04
Rajpo00365	tex10	13.29	6.12	9.15	14.91	59.45	11.5	45.53	12.76
Rajpo02119	tubulin delta chain-like isoform X1 (A)	13.29	3.08	9.01	12.52	55.02	19.08	9.52	6.38
Rajpo15950	guanine nucleotide-binding protein G(q) subunit alpha (A)	13.28	3.98	5.31	5.49	9.09	8.52	13.64	3.94
Rajpo16998	tmem104	13.25	10.83	6.62	8.37	290.85	75.61	36.87	6.21
Rajpo12113	usp31	13.24	1.09	1.5	0.72	3.56	3.73	1.58	2.07
Rajpo12132	lmf1	13.24	17.09	5.28	2.09	20.07	16.87	9.07	2.91
Rajpo06489	prmt3	13.24	6.27	10.09	11.7	37.44	8.54	28.33	7.25
Rajpo20793	RCC1 and BTB domain-containing protein 2 isoform X1 (A)	13.22	6.1	7.23	12.79	65.31	11.47	30.31	5.92
Rajpo01477	dennd4a	13.22	0.99	10.86	1.79	15.6	1.2	4.15	4.33
Rajpo12682	rspry1	13.21	4.01	4.66	7.8	53.33	3.89	17.51	4.52
Rajpo09360	smap2	13.21	12.71	9.27	3.49	15.58	5.06	23.53	6.43
Rajpo22385	inpp5f	13.21	1.08	7.05	10.21	33.57	6	38.79	4.44
Rajpo04699	magi2	13.2	0.76	1.08	1.37	13.04	2.27	0.29	0.92
Rajpo11618	dhx38	13.19	6.72	18.28	15.4	23.25	9.59	21.55	10.61
Rajpo21604	zyg11b	13.18	1.81	2.95	2.73	31.11	7.85	5.91	3.9
Rajpo03335	edc3	13.14	5.02	1.82	0.98	41.03	2.43	3.31	5.31
Rajpo20262	ap1ar	13.14	11.68	24.57	36.86	100.71	35.44	59.55	23.67
Rajpo07018	azi2	13.13	5.52	5.6	6.59	20.1	13.1	21.95	11.65
Rajpo10837	LOW QUALITY PROTEIN: AP-1 complex subunit gamma-1-like (A)	13.12	3.76	3	2.26	24.25	6.83	9.03	4.97
Rajpo15218	dipeptidyl aminopeptidase-like protein 6 (A)	13.12	0.67	0	0.25	8.59	0	0	0
Rajpo12170	AFG3-like protein 2 (A)	13.12	8	11.32	12.14	43.05	12.72	22.96	3.67
Rajpo17003	llgl2	13.11	23.02	17.02	29.12	59.44	27.08	84.43	7.8
Rajpo04693	fam185a	13.11	6.22	13.92	12.99	17.25	14.35	33.07	20.36
Rajpo02492	LOW QUALITY PROTEIN: thioredoxin reductase 2, mitochondrial-like (A)	13.11	7.09	10.5	5.02	12.82	15.76	7.7	7.25
Rajpo06665	tmem161a	13.1	8.39	14.89	7.68	1.1	11.69	8.33	41.55
Rajpo12476	nuclear envelope pore membrane protein POM 121-like isoform X1 (A)	13.07	7.8	2.23	0.53	28.07	6.6	3.85	4.44
Rajpo14205	teneurin-2-like (A)	13.07	0.14	0	0	0.53	0	0.12	0
Rajpo16804	ras-related protein Rab-3D-like (A)	13.06	4.61	128.07	247.22	11.42	110.61	788.3	29.36
Rajpo04629	SCRIB	13.05	9.58	6.68	3.36	9.26	16.45	5.25	5.12
Rajpo22950	LOW QUALITY PROTEIN: transportin-3-like (A)	13.05	6.53	4.4	2.68	13.24	7.65	7.06	3.66
Rajpo09743	lman2l	13.03	3.8	7.69	18.17	43.01	37.06	25.05	11.02
Rajpo04210	ZBTB16	13.02	12.94	8.57	2.04	22.59	3.04	1.81	9.05
Rajpo13552	fynb	13.02	0.75	7.4	3.52	9.57	1.15	6.38	6.62
Rajpo01215	phf21b	13.01	1	0.91	1.09	5.48	1.98	1.14	1.74
Rajpo02726	cerkl	13	1.43	0.35	0.72	15.98	2.97	1.79	0.28
Rajpo16633	tlk1a	13	12.91	6.58	6.88	45.36	12.39	14.29	7.25
Rajpo02816	transducin-like enhancer protein 4 isoform X1 (A)	12.99	0.28	1.17	1.26	25.55	3.59	1.02	1.71
Rajpo10438	ccdc88a	12.99	1.14	4.39	2.25	7.5	3.59	2.01	2.87
Rajpo12207	svila	12.98	3.52	26.21	11.42	21.93	0.8	5.97	58.58
Rajpo01597	rho-related GTP-binding protein RhoN-like (A)	12.97	14.87	7.86	15.91	9.71	8.83	67.5	3.79
Rajpo05590	mospd2	12.96	22.49	8.5	10.24	42.44	14.6	14.91	7.8
Rajpo08282	adcy5	12.93	4.69	4.91	0.8	10.12	9.46	2.07	2.42
Rajpo14114	trmt1l	12.92	4	4.4	6.36	46.46	5.11	20.95	4.14
Rajpo18904	epsin-2-like isoform X1 (A)	12.9	4.65	3.52	1.65	17.62	1.79	2.49	4.99
Rajpo11880	arhgap1	12.9	10.14	7.4	5.89	47.89	16.03	38.77	10.72
Rajpo10139	rnf150a	12.89	1.17	2.71	3.52	16.53	14.59	3.2	3.26
Rajpo08144	p4htmb	12.88	2.08	0.75	1.06	6.31	4.44	0.45	1.71
Rajpo06060	b4galt6	12.87	1.63	1.53	0.63	8.42	2.77	5.55	1.96
Rajpo00248	pyruvate dehydrogenase (acetyl-transferring) kinase isozyme 2, mitochondrial-like (A)	12.86	7.73	10.94	11.91	53.97	10.27	47.4	6.92
Rajpo01644	rnf180	12.85	1.97	2.11	1.79	9.38	2.53	0.25	2.95
Rajpo00896	protocadherin-1-like isoform X1 (A)	12.84	8.67	1.33	1.11	15.34	10.38	8.55	1.11
Rajpo14252	lrig3	12.81	10.39	5.3	6.07	23.53	3.75	9.74	2.04
Rajpo17130	rabl3	12.81	4.96	12.5	10.85	47.1	12.19	17.9	5.13
Rajpo00819	kinesin-like protein KIF3C isoform X2 (A)	12.79	0.26	0.69	0.5	12.39	0.19	1.67	1.02
Rajpo20072	CDP-diacylglycerol--glycerol-3-phosphate 3-phosphatidyltransferase, mitochondrial (A)	12.79	12.03	15.96	12.56	23.86	17.71	17.21	37.47
Rajpo13238	isocitrate dehydrogenase [NADP], mitochondrial (A)	12.78	0.53	7.31	18.18	110.56	50.32	71.15	5.3
Rajpo21427	cdkl5	12.77	4.63	2.78	5.41	14.69	5.47	9.37	3.29
Rajpo14162	Cachd1	12.77	0.29	5.01	4.3	9.64	17.08	11.11	5.54
Rajpo07946	klf12	12.75	5.51	1.95	1.28	0.8	1.09	3.5	3.53
Rajpo02509	faah2	12.74	21.18	2.75	1.62	24.45	6.89	4.26	1.79
Rajpo02538	tripeptidyl-peptidase 2 (A)	12.72	9.49	7.22	3.75	21.79	21.55	13.81	8.77
Rajpo13452	kcnn2	12.71	0	0.39	0.35	23.57	0.2	0.38	0.91
Rajpo17958	protoheme IX farnesyltransferase, mitochondrial (A)	12.7	6.27	16.45	12.81	14.71	14.85	28.57	11.36
Rajpo10964	AT-rich interactive domain-containing protein 2-like isoform X1 (A)	12.7	3.2	1.54	0.7	11.37	4.71	2.04	2.64
Rajpo07635	pex7	12.7	4.16	13.84	13.68	28.74	23.33	13.52	13.75
Rajpo07167	MFSD1	12.68	12.03	6.83	15.62	16.55	47.37	34.99	11.12
Rajpo20417	senp6a	12.68	5.98	7.63	6.24	50.8	11.22	16.9	6.7
Rajpo15107	kdm7a	12.67	7.81	13.09	20.14	30.14	11.36	27.41	21.65
Rajpo01398	slc24a3	12.67	3.01	4.1	0.83	1.82	0.37	0.16	7.09
Rajpo20783	LOW QUALITY PROTEIN: RCC1 and BTB domain-containing protein 1-like (A)	12.66	2.75	3.55	5.97	42.57	9.98	16.5	2.84
Rajpo03493	slc45a4	12.65	3.97	1.73	2.87	13.49	5.05	9.31	1.99
Rajpo02564	hao2	12.64	50.35	22.59	17.94	8.02	77.68	26.76	5.56
Rajpo09376	tmtc2	12.63	1.12	0.22	0.09	1.24	0.11	0.62	0.28
Rajpo19794	slx9	12.61	6.04	19.42	24.46	59.87	20.92	61.84	9.86
Rajpo07418	pcdh17	12.56	0.24	0.44	0.11	5.96	8.17	0.67	0.28
Rajpo13839	cAMP-dependent protein kinase catalytic subunit alpha-like isoform X1 (A)	12.55	0.39	16.44	17.52	12.92	2.64	3.89	1.95
Rajpo21925	probable phospholipid-transporting ATPase IIA (A)	12.54	2.44	0.91	1.52	11.07	1.62	11.93	0.68
Rajpo09111	wdr19	12.54	0.72	2.56	4.37	5.41	10.93	5.09	1.69
Rajpo15313	uap1	12.54	9.36	10.86	11.75	3.5	13.78	46.59	7.73
Rajpo03601	nhlrc2	12.54	8	19.23	18.3	9.88	13.75	45.77	14.58
Rajpo21067	gbf1	12.54	7.59	5.57	5.34	18.32	28.82	16.46	5.67
Rajpo03344	sorbitol dehydrogenase-like isoform X1 (A)	12.52	1547.76	82.63	45.8	73.73	36.47	67.89	143.29
Rajpo05680	LOW QUALITY PROTEIN: malignant fibrous histiocytoma-amplified sequence 1 homolog (A)	12.48	5.08	5.08	3.78	16.04	14.17	3.05	12.74
Rajpo06967	ubiquitin carboxyl-terminal hydrolase 12-like (A)	12.46	7.73	3.23	3.97	9.27	13.93	22.05	5.97
Rajpo01776	ADP-ribosylation factor-like protein 8B-A (A)	12.46	7.54	2.79	3.15	4.39	12.13	7.54	11.01
Rajpo04927	lyar	12.45	21.06	40.54	83.15	192.12	69.32	109.12	32.18
Rajpo22373	plekha1	12.39	5.69	10.22	11.23	19.99	20.87	35.14	9.02
Rajpo04079	cog5	12.39	8.24	12.03	17.47	41.6	23.66	42.02	26.92
Rajpo02679	ksr1	12.38	3.86	3.33	1.49	3.17	10.56	19.15	3.88
Rajpo17720	stonin-1 (A)	12.35	0.36	1.06	0.47	14.98	5.56	0.94	9.38
Rajpo16360	golga7	12.34	3.07	4.64	3.76	17.57	4.73	18.49	1.29
Rajpo17759	LOW QUALITY PROTEIN: LIM and cysteine-rich domains protein 1-like (A)	12.34	12.99	12.9	3.86	1.18	3.04	1.25	10.79
Rajpo09129	eefsec	12.32	9.37	16	10.5	70.95	24.12	18.67	18.64
Rajpo13956	dis3	12.3	5.66	10.53	20.07	47.48	23.73	27.65	12.19
Rajpo17745	LOW QUALITY PROTEIN: MAGUK p55 subfamily member 2-like (A)	12.3	1.03	0.99	0.48	0.06	2.71	0.14	0.06
Rajpo21685	oxysterol-binding protein 1 (A)	12.3	0.15	0.82	0.42	1.4	1.27	0.13	2.67
Rajpo02459	MYO18A	12.25	4.62	18.07	8.01	8.57	2.23	8.2	27.53
Rajpo16338	cAMP-responsive element modulator isoform X1 (A)	12.25	16.15	5.62	13.89	31.56	6.51	43.86	4.43
Rajpo15624	RFT1	12.23	5.13	10.66	12.07	23.71	17.83	10.86	3.06
Rajpo20454	snx17	12.22	9.36	2.08	1.17	7.83	2.81	17.5	5.81
Rajpo04387	E3 ubiquitin-protein ligase TRIM39-like (A)	12.21	18.99	6.26	2.02	9.37	13.33	9.47	7.92
Rajpo01271	fructose-1,6-bisphosphatase 1-like (A)	12.2	713.64	39.96	79.14	34.75	17.46	191.71	13.34
Rajpo06331	ranbp10	12.2	8.86	4.72	2.82	16.55	4.99	8.23	9.17
Rajpo09201	potassium voltage-gated channel subfamily C member 1 isoform X1 (A)	12.19	0	0	0	0	0	0.04	0
Rajpo15160	chd7	12.19	7.07	4.56	2.47	12.8	2.33	0.9	1.6
Rajpo14176	cop1	12.16	4.96	5.02	8.24	58.62	7.62	30.2	14.79
Rajpo22513	von Willebrand factor A domain-containing protein 8-like (A)	12.16	4.85	13.84	7	7.07	22.29	6.26	8.56
Rajpo17423	timm21	12.14	10.5	11.4	10.04	43.34	8.08	17.85	7.57
Rajpo09940	st3gal3a	12.14	0	0.83	1.36	4.29	0.26	1.86	2.64
Rajpo19232	atg2a	12.12	4.3	3.4	1.38	6.49	10.39	2.33	8.18
Rajpo19049	fibroblast growth factor 1-like (A)	12.12	0.87	1.14	5.77	13.67	62.53	1.29	3.54
Rajpo22859	cep164	12.11	2.53	9.77	8.49	31.43	41.48	8.73	11.84
Rajpo05280	FSD1-like protein isoform X1 (A)	12.1	7.85	13.14	8.41	12.45	4.94	5.49	19.8
Rajpo18795	med16	12.1	7.39	9.53	15.47	50.53	19.38	21.26	7.2
Rajpo19080	fam135a	12.09	2.63	2.13	2.72	4.43	12.42	10.28	2.7
Rajpo22602	dipk2ab	12.08	2.79	2.42	2.48	15.22	2.69	4.83	3.13
Rajpo14764	anapc1	12.07	3.84	7.75	6.47	35.71	8.13	12.48	7.58
Rajpo15163	LOW QUALITY PROTEIN: aspartyl/asparaginyl beta-hydroxylase-like (A)	12.07	13.26	7.49	5.34	3.3	10.22	10.81	6.42
Rajpo01704	smarcd1	12.06	4.6	3.83	1.87	26.99	5.62	14.43	4.2
Rajpo10574	yipf6	12.06	11.17	8.23	6.86	21.03	26.8	38.26	7.78
Rajpo19497	med24	12.06	3.18	4.18	5.02	13.18	5.37	9.8	6.59
Rajpo05229	GTPase KRas isoform X1 (A)	12.05	8.54	12.48	9.19	17.27	12.22	24.49	12.33
Rajpo18993	slc30a7	12.04	17.54	5.55	4.62	21.34	89.33	45.67	4.68
Rajpo22405	elp4	12.03	4.05	15.64	17.49	39.66	14.4	12.36	17.56
Rajpo18870	MMAA	12.03	7.81	16.23	20.72	24.48	21.66	20.06	10.82
Rajpo08372	tdp2	12.03	11.98	7.9	18.09	43.77	13.08	22.88	16.35
Rajpo04922	rffl	12.02	4.25	5.23	4.13	29.41	13.04	14.73	3.33
Rajpo04921	rfc2	12.01	4.63	13.53	22.9	35.52	12.25	33.14	10.9
Rajpo10936	vill	12	4.31	3.19	0.91	1.13	21.42	41.93	0.18
Rajpo11386	nf1a	12	4.68	2.11	1	8.6	6.32	3.12	4.56
Rajpo16115	kif21b	11.98	0.17	0.8	0.48	1.62	0.88	0.25	0.03
Rajpo02833	LOW QUALITY PROTEIN: TBC1 domain family member 14-like (A)	11.98	5.53	3.87	3.34	26.42	7.54	9.34	4.17
Rajpo18062	LOW QUALITY PROTEIN: GDNF family receptor alpha-1-like (A)	11.95	0	0	0	4.46	0	1.77	0.38
Rajpo17715	exportin-5 isoform X1 (A)	11.94	5.45	10.17	7.65	29.42	13.14	11.9	10.69
Rajpo22572	mitochondrial inner membrane protein COX18 isoform X1 (A)	11.94	8.5	8.12	7.09	54.52	28.24	14.58	8.5
Rajpo12591	blzf1	11.92	5.14	6.38	5.23	38.37	25.32	17.88	5.35
Rajpo15891	segment polarity protein dishevelled homolog DVL-1 (A)	11.91	2.03	2.61	1.92	8.32	16.52	4.26	2.55
Rajpo13924	lysine-specific demethylase 4C isoform X1 (A)	11.89	5.18	11.02	12.9	23.43	18.79	21.42	12.5
Rajpo02540	mcf2a	11.89	0.03	9.16	2.84	0.33	1.53	0.3	9.13
Rajpo14327	TECRL	11.89	0	50.04	24.56	0.12	0.56	0	37.89
Rajpo12540	neto1l	11.88	0.14	0	0	0.59	0	0	0
Rajpo10120	RAB40B	11.88	10.38	4.38	2.73	19.73	13.97	10.6	4.55
Rajpo15740	H(+)/Cl(-) exchange transporter 4 (A)	11.84	0.09	1.28	0.62	0.94	0.56	0.15	1.73
Rajpo15124	palmitoyltransferase ZDHHC20-B isoform X1 (A)	11.84	6.5	3.25	11.17	5.83	7.49	25.72	6.34
Rajpo20064	MAP2K6	11.84	1.74	3.92	0.88	6.84	5.69	0.57	3.52
Rajpo09528	trim62	11.83	7.27	1.42	1.33	14.06	11.48	3.99	1.75
Rajpo10465	atp8a1	11.83	1.86	2.14	2.46	11.33	8.84	3.32	5.11
Rajpo15925	spectrin beta chain, non-erythrocytic 1 (A)	11.82	0.63	12.15	6.25	2.85	6.17	0.42	14.61
Rajpo07855	cog4	11.82	2.62	3.3	2.13	13.15	9.65	9.54	6.12
Rajpo18871	smad1	11.82	8.32	5.86	4.25	42.2	5.4	9.76	8.28
Rajpo05472	ccdc138	11.82	1.73	5.51	5.8	45.47	19.74	5.65	6.51
Rajpo21668	synaptotagmin-B (A)	11.81	0	0	0	1.06	0	0	0.22
Rajpo20944	metabotropic glutamate receptor 7 (A)	11.81	0.16	0.79	0.9	10.68	0.56	2.04	1.02
Rajpo07815	pxylp1	11.81	8.79	6.25	13	82.46	35.86	11.18	1.77
Rajpo21044	reep3b	11.8	1.67	17.76	54.78	11.95	7.62	123.35	11
Rajpo10757	tyro3	11.79	0.41	11.85	11.04	2.37	6.49	66.3	1.87
Rajpo15028	CLK4-associating serine/arginine rich protein-like (A)	11.73	4.94	16.08	3.35	6.37	17.62	4.49	7.24
Rajpo20993	fam210b	11.72	3.1	3.17	0.65	1.82	3.1	2.5	1.53
Rajpo14850	lpcat1	11.71	0.57	1.18	1.84	22.89	4.75	19.58	0.85
Rajpo11696	GRIA3	11.71	0.02	0.27	0.11	0.15	0.46	0.06	0.06
Rajpo15425	mertka	11.71	0.88	1.71	0.78	7.08	5.37	3.08	4.17
Rajpo00818	ASXL2	11.7	10.22	4.31	2.31	5.81	8.11	11.22	5.98
Rajpo05154	zfc3h1	11.69	4.92	8.88	9.75	9.7	17.94	13.24	7.17
Rajpo08717	itpr1b	11.69	7.25	2.77	1.56	13.96	3.62	1.59	4.04
Rajpo14544	MFSD8	11.68	1.46	2.19	1.35	6.08	11.69	2.5	1.41
Rajpo06459	cpd	11.68	7.2	3.98	3.03	14.39	27.4	27.58	8.59
Rajpo04395	timm50	11.68	6.16	9.16	5.47	30.41	11.49	17.13	7.26
Rajpo07877	nfxl1	11.67	7.52	4.41	5.14	32.19	8.58	9.64	11.17
Rajpo09225	ebf1a	11.67	1.49	3.47	0.73	3.55	1.14	3.09	5.72
Rajpo18739	prdm10	11.66	4.92	5.22	2.37	36.33	17.12	5.77	4.45
Rajpo05691	tmem255a	11.65	0.6	15.33	12	21.36	0.69	0.1	8.35
Rajpo12112	hs3st2	11.62	0.27	0.58	1.09	11.73	0.39	0.86	0
Rajpo06361	drg2	11.62	7.27	7.64	9.58	72.48	3.37	35.62	7.45
Rajpo08993	grik1a	11.61	0.02	0.52	1.29	0.4	4.34	0.02	0.09
Rajpo18201	atg4a	11.6	4.49	11.16	10.86	18.36	14.18	17.97	41.91
Rajpo08221	tbc1d30	11.58	0.34	6.15	10.43	68.93	77.63	12.22	1.29
Rajpo02541	atp11c	11.58	65.85	6.17	14.59	6.6	9.79	20.29	4.69
Rajpo15164	asph	11.57	2.42	291.3	332.71	2.09	2.98	7.91	144.54
Rajpo19739	pqlc1	11.56	9.99	1.06	1.4	54.38	22	13.75	3.95
Rajpo05853	specc1la	11.54	6.95	2.16	1.35	31.83	7.06	8.89	5.58
Rajpo16349	vrk1	11.53	7.68	6.41	9.17	134.47	16.27	37.11	10.18
Rajpo18969	low-density lipoprotein receptor-related protein 8-like (A)	11.5	4.9	2.75	1.61	4.8	0.71	21.7	0.4
Rajpo08878	rc3h2	11.5	3.62	2.98	1.37	4.56	5.92	3.43	3.64
Rajpo11810	atrn	11.5	2.91	1.82	0.87	10.74	3.69	2.38	2.06
Rajpo22613	protein mono-ADP-ribosyltransferase PARP12 (A)	11.5	14.78	11.37	15.2	11.45	11.18	71.11	9.14
Rajpo03607	fam160b1	11.49	8.99	5.37	5.44	26.84	21.87	17.86	12.8
Rajpo06239	LOW QUALITY PROTEIN: elongin-A-like (A)	11.47	12.48	8.6	6.16	15.77	11.6	23.98	9.12
Rajpo06744	KDM4B	11.45	5.25	3.79	2.87	16.95	4.84	8.14	7.12
Rajpo18577	cunh12orf29	11.44	0.95	6.59	5.07	50.75	13.41	11.72	1.71
Rajpo05470	LIM and senescent cell antigen-like-containing domain protein 1 isoform X1 (A)	11.42	3.29	31.26	32.45	25.72	7.41	79.15	34.61
Rajpo08730	LOW QUALITY PROTEIN: phosphoinositide 3-kinase adapter protein 1-like (A)	11.42	11.9	4.11	3.52	10.68	11.55	8.07	3.31
Rajpo17575	nmt2	11.41	3.63	9.44	9.9	18.45	9.24	11.62	8.14
Rajpo07534	usp3	11.4	1.38	3.31	1.92	16.46	5.77	6.48	5.27
Rajpo12684	cpne2	11.4	0.9	0	0.14	2.5	2.69	0.44	1.62
Rajpo19874	pik3c2a	11.34	6.68	2.89	1.3	18.39	6.62	3.87	3.45
Rajpo11832	ACVR2A	11.34	2.13	0.24	0.5	6.57	3.75	1.95	6.64
Rajpo06075	ttc21b	11.33	2.24	3.92	2.38	6.59	5.56	3.3	6.74
Rajpo04421	sv2ca	11.33	0.02	0	0	0	0.07	0	0
Rajpo17396	rrn3	11.32	6.09	2.88	3.94	5.79	30.7	9.9	5.68
Rajpo04803	hps3	11.31	4.75	5.43	1.89	1.22	16.37	3.16	1.97
Rajpo11587	uncharacterized protein LOC109934850 (A)	11.3	0.99	2.86	3.47	25.26	0.71	9.94	0.89
Rajpo14870	ap3b1a	11.3	11.3	7.44	4.85	72.63	28.04	25.45	13.58
Rajpo05945	pdcd11	11.29	5.81	4.83	3.92	26.66	12.71	8.22	6.27
Rajpo16012	zswim8	11.29	6.3	3.36	1	7.76	9.26	2.7	2.88
Rajpo10235	SLIT1	11.26	0.04	1.95	0.63	2.29	0.04	0	0.55
Rajpo09566	gba2	11.24	5.69	1.77	3.67	21.78	11.09	16.32	2.19
Rajpo06211	lrrc1	11.24	6.32	2.15	4.08	10.66	22.79	21.05	0.65
Rajpo01436	katanin p60 ATPase-containing subunit A-like 1 (A)	11.21	0.58	1.4	1.2	36.09	3.76	2.95	2.64
Rajpo02317	sdr16c5b	11.19	59.47	9.07	17.9	70.35	69.61	53.79	6.88
Rajpo17905	striatin-3-like (A)	11.17	4.96	3.55	2.51	11.89	12.36	9.29	9.07
Rajpo17928	stx6	11.11	3.15	4.19	2.87	17.79	11.25	6.26	14.22
Rajpo05538	polr3f	11.1	3.69	13.56	16.47	71.97	28.05	15.43	22.13
Rajpo09252	dnajc1	11.09	12.63	21.81	28.39	91.57	61.94	39.75	23.03
Rajpo21931	cyld	11.08	3.54	7.44	6.47	15.74	8.52	10.94	6.91
Rajpo05976	catenin alpha-3 (A)	11.07	0.06	3.56	0.94	0.53	0	0.05	4.2
Rajpo08238	G protein-coupled receptor kinase 5-like (A)	11.07	16.35	3.9	1.55	13.71	6.95	9.82	4.95
Rajpo10027	ino80	11.07	9	5.98	3.24	20.27	8.96	7.51	10.4
Rajpo06909	voltage-dependent L-type calcium channel subunit alpha-1S-like isoform X1 (A)	11.04	0.56	289.54	186.76	2.78	2.23	0.49	339.22
Rajpo00246	integrin alpha-3-like (A)	11.02	2.91	2.26	0.41	12.5	1.38	26.68	1.47
Rajpo03169	pfkfb2	11	3.27	10.23	5.91	4.24	12.72	9.45	4.99
Rajpo20440	dclk1a	10.98	0	0	0	36.86	0	0.13	0
Rajpo10335	mtbp	10.98	4.54	5.65	4.36	12.94	16.65	10.28	5.86
Rajpo19559	cfap36	10.97	3.1	5.93	10.79	33.59	28.86	15.69	10.47
Rajpo20356	peli2	10.96	3.35	2.17	1.9	22.57	4.32	3.54	3.58
Rajpo21179	bbs9	10.93	1.44	1.08	0.81	22.94	4.44	1.48	1.63
Rajpo01414	dab2ip	10.92	8.32	4.35	3.14	8.59	0.66	3.82	5.14
Rajpo04762	cnppd1	10.91	2.41	10.12	2.57	1.13	5.51	8.9	3.68
Rajpo20686	myosin light chain kinase, smooth muscle (A)	10.9	3.44	1.17	1.09	1.48	1.17	2.35	0.86
Rajpo00134	tomoregulin-1 (A)	10.9	0	1.67	0.55	1.42	0	0	1.93
Rajpo03678	dlgap1	10.89	0	0.65	0	0.39	0	0	0.14
Rajpo09772	ak7	10.89	5.05	5.58	4.65	25.1	23.95	16.11	12.56
Rajpo08585	trmt11	10.83	4.67	4.37	5.97	14.05	23.96	12.69	6.34
Rajpo12181	pde1a	10.83	0.79	0.69	0.35	12.23	5.67	3.47	0.77
Rajpo11683	atxn7l1	10.82	5.59	2.42	1.82	10.5	12.14	5.09	6.2
Rajpo01490	trpm7	10.78	10.55	2.8	2.73	6.27	10.75	7.26	4.6
Rajpo04670	nuclear receptor coactivator 3 isoform X1 (A)	10.77	7.85	1.12	0.43	3.84	3.35	3.4	2.3
Rajpo19123	ikzf2	10.77	0.58	0.88	3	9.36	10.76	4.62	0.59
Rajpo12649	bmp2k	10.76	4.12	3.28	2.83	41.67	96.95	8.18	5.09
Rajpo07541	tbc1d2b	10.76	4.25	2.56	1.74	48.88	5.7	4.69	2.79
Rajpo08391	ercc4	10.76	3.67	3.71	5.27	15.79	10.21	16.83	8.27
Rajpo14749	cunh8orf82	10.74	5.78	14.25	14.34	45.28	30.99	12.38	16.99
Rajpo17973	LOW QUALITY PROTEIN: dystrophin-like (A)	10.73	5.17	13.79	6.34	12.13	2.25	1.16	37.79
Rajpo09302	axl	10.72	15.1	5.1	1.62	9.52	1.16	8.78	8.9
Rajpo06631	LOW QUALITY PROTEIN: RNA-binding E3 ubiquitin-protein ligase MEX3C-like (A)	10.72	2.59	4.5	6.83	22.1	7.76	19.48	5.82
Rajpo04316	ace	10.71	1.1	28.92	20.36	2.74	5.98	3.66	8.02
Rajpo20960	atcay	10.7	0.06	0.48	0	3.52	0.56	0	1.28
Rajpo00250	ppp1r9b	10.7	0.61	1.08	0.48	22.83	0.21	7.04	1.03
Rajpo17270	gli2a	10.7	0.21	1.17	0.86	4.88	0.46	1.8	8.36
Rajpo05655	bifunctional 3'-phosphoadenosine 5'-phosphosulfate synthase 2-like (A)	10.68	46.73	1.41	0.93	4.81	10.6	10.47	1.4
Rajpo20120	neurocalcin-delta (A)	10.68	0.62	0.77	0.16	8.21	1.5	0.18	4.25
Rajpo01991	cercam	10.68	0.39	18.07	6.65	1.99	2.89	10.8	27.21
Rajpo17495	nuclear receptor ROR-alpha A (A)	10.66	0.95	0.48	0.45	1.26	1.06	0.9	0.59
Rajpo00254	tut1	10.66	5.53	23.59	42.16	51.43	20.47	63.02	17.4
Rajpo02427	efl1	10.65	3.51	3.57	2.73	43.31	23.48	7.23	7.66
Rajpo09931	protein unc-80 homolog (A)	10.64	0.03	0.01	0.01	14.78	9.21	0.01	0
Rajpo11434	bcas3	10.64	10.29	4.6	1.76	27.57	8.99	4.48	7.49
Rajpo17923	retinoic acid receptor RXR-gamma-A isoform X1 (A)	10.64	9.4	14.76	10.51	7.05	1.4	0.51	28.21
Rajpo21032	tyrosine-protein kinase Src-2 isoform X1 (A)	10.63	6.74	2.39	1.48	8.54	9.54	13.6	0.84
Rajpo12159	histone PARylation factor 1 isoform X1 (A)	10.61	2.3	7.32	12.7	104.04	6.21	14.58	2.82
Rajpo18484	PRKCE	10.6	0.55	6.34	4.56	8.58	0.95	0.92	3.56
Rajpo18429	PDZ domain-containing protein GIPC1-like (A)	10.6	14	16.12	14.3	56.64	51.21	84.69	6.27
Rajpo16139	LOW QUALITY PROTEIN: ectonucleoside triphosphate diphosphohydrolase 6-like (A)	10.6	3.25	11.69	10.58	4.85	20.57	26.83	7.06
Rajpo08467	guanine nucleotide-binding protein G(q) subunit alpha (A)	10.58	0.1	0.37	0.08	23.94	3.03	1.39	0.72
Rajpo21107	atad2	10.58	6.39	6.65	7.67	48.96	21.1	13.69	9.36
Rajpo20833	FGF14	10.57	0	0.15	0.24	0.23	0	0.07	3.28
Rajpo01572	ctnna2	10.57	0	0.51	0.14	0.61	0.93	0	0.16
Rajpo21065	sgpl1	10.56	12.33	1.44	0.15	9.76	18.62	3.28	3.3
Rajpo03649	klhl14	10.54	1.38	0	0.48	4.88	6.59	0.04	0.09
Rajpo22289	dync2h1	10.54	0.45	1.05	0.17	4.93	4.94	2.06	0.61
Rajpo16503	multiple PDZ domain protein isoform X1 (A)	10.53	2.03	1.46	0.52	5.27	3.18	0.85	3.72
Rajpo14538	ints10	10.53	9.04	3.25	4.98	18.13	8.67	14.52	3.53
Rajpo04351	mospd1	10.5	6.1	13.88	7.3	23.98	7.43	8.8	12.7
Rajpo12968	ATP-binding cassette sub-family D member 2 (A)	10.49	3.85	1.5	1.54	7.43	3.93	3.13	4.45
Rajpo19649	ptar1	10.49	2.69	9.13	9.37	34.18	5.23	27.73	6.22
Rajpo09035	ric1	10.46	3.08	2.9	2.18	8.91	5.08	5.54	3.1
Rajpo11750	adgra3	10.42	5.82	10.98	7.87	40.41	7.05	5.8	7.16
Rajpo16341	nrp1a	10.41	5.47	3.86	0.61	0.72	7.3	2.03	2.1
Rajpo18740	nfrkb	10.41	5.22	8.52	5.8	46.28	36.45	8.67	6.23
Rajpo16650	slc25a22a	10.39	8.64	0.1	0	1.17	0.16	0	0
Rajpo13654	slc24a5	10.38	0	0.31	0.3	7.17	0.19	0.32	0.89
Rajpo03873	slc16a2	10.38	9.4	1.1	2.06	3.3	1.4	1.98	0
Rajpo04094	gramd4	10.38	2.47	6.77	5.11	21.23	10.32	9.25	10.54
Rajpo08509	smarcc2	10.36	5.69	10.13	8.08	8.93	5.94	5.88	3.08
Rajpo13481	glra2	10.36	0	0	0	0.1	0	0	0
Rajpo14897	scarf2	10.35	1.32	2.55	0.7	1.22	1.06	3.86	3.69
Rajpo04345	bard1	10.35	2.19	3.73	4.27	47.14	7.1	11.45	3.4
Rajpo18325	amacr	10.33	24.72	4.7	7.21	37.44	92.87	10.61	14.47
Rajpo16679	iars1	10.33	5.48	6.45	6.99	13.54	6.97	38.22	9.04
Rajpo17523	LOW QUALITY PROTEIN: organic solute transporter subunit alpha-like (A)	10.31	1.03	13.25	20.99	5.74	1	13.43	15.34
Rajpo22465	cacna2d3	10.3	0.15	0.77	0.41	5.5	0.21	2.61	1.66
Rajpo20574	ube3b	10.29	2.92	3.77	2.37	12.13	18.99	4.71	5.17
Rajpo02919	mmp15	10.29	0.6	3.51	1.75	2.45	2.83	1.26	20.45
Rajpo12857	dop1a	10.28	1.95	3.14	3.64	15.4	8.66	5.57	3.58
Rajpo17070	ras-related protein Rab-26-like isoform X1 (A)	10.27	0.38	1.57	1.87	60.33	0.67	1.67	0.96
Rajpo08063	CRTC1	10.26	4.07	5.58	1.47	7.09	4.19	0.98	3.54
Rajpo17909	fam20b	10.25	4.77	3.5	6.2	16.12	9.75	8.81	4.37
Rajpo11428	ints2	10.25	3.45	5.22	5.62	50.48	14.37	10.39	5.23
Rajpo15844	atad3a	10.25	10.2	7.41	1.91	11.8	7.85	4.67	2.64
Rajpo09056	ptpn1	10.24	10.23	1.43	3.95	14.99	8.52	30.48	5
Rajpo02422	endophilin-A3-like (A)	10.23	0.84	49.61	53.53	75.94	0.31	4.14	11.49
Rajpo16405	vps35l	10.22	3.65	3.68	2.16	29.05	8.61	8.24	5.71
Rajpo10916	mier3	10.21	2.45	0.9	1.14	5.77	5.22	3.04	4
Rajpo16478	brpf1	10.21	4.08	4.35	3.74	13.86	8.16	7.85	4.74
[truncated: 1,523 more rows]
